# Supplementary material for: Effect of hypoxia and reoxygenation on the nervous system of the Mediterranean mussel Mytilus galloprovincialis
Source: Research Square preprint supplement (doi:10.21203/rs.3.rs-8775360/v1), 2026-02-16
Supplement: Supplementary file 1 [file 1ea9cf5ac558d63d546b77b2.xlsx]

## Sheet: Foglio1
Hypoxia vs normoxia UNIQUE				hypoxia vs normoxia SHARED				reoxygenation vs normoxia UNIQUE				reoxygenation vs normoxia SHARED
gene_id	log2FoldChange	sseqid		gene_id	log2FoldChange	sseqid		gene_id	log2FoldChange	sseqid		gene_id	log2FoldChange	sseqid
MGAL_10B040989	-1.77	UNC22_CAEEL		MGAL_10B000134	1.83	EGLN1_RAT		MGAL_10B001237	4.58	TM218_BOVIN		MGAL_10B000134	1.87	EGLN1_RAT
MGAL_10B069968	-8.08			MGAL_10B006736	6.69	CRBL2_MOUSE		MGAL_10B003569	5.11	SYCC_MOUSE		MGAL_10B006736	5.77	CRBL2_MOUSE
MGAL_10B064486	-7.66			MGAL_10B009328	2.59	LEG2_HUMAN		MGAL_10B004162	-6.65	TIF1B_RAT		MGAL_10B009328	2.15	LEG2_HUMAN
MGAL_10NCA026463	-7.52			MGAL_10B013199	3.64	PIAP_PIG		MGAL_10B004209	1.88			MGAL_10B013199	2.94	PIAP_PIG
MGAL_10B031473	-7.33			MGAL_10B016724	3.38	AOX_ASPNG		MGAL_10B007055	-7.2	POLR_DROME		MGAL_10B016724	3.13	AOX_ASPNG
MGAL_10NCA032127	-7.24			MGAL_10B021844	7.02	HSP74_ANOAL		MGAL_10B008181	-1.69	CC2_RAT		MGAL_10B021844	7.58	HSP74_ANOAL
MGAL_10NCA067630	-7.15			MGAL_10B023412	8.94	BIRC7_XENTR		MGAL_10B010226	3.59	HDHD5_HUMAN		MGAL_10B023412	7.95	BIRC7_XENTR
MGAL_10B072821	-6.98			MGAL_10B032861	1.64	ADH_SULAC		MGAL_10B010251	-4.33	TITIN_MOUSE		MGAL_10B032861	1.63	ADH_SULAC
MGAL_10NCA044731	-6.94			MGAL_10B034053	7.74	BIR7A_XENLA		MGAL_10B011144	-2.88	HMCN1_MOUSE		MGAL_10B034053	6.86	BIR7A_XENLA
MGAL_10B008563	-6.92			MGAL_10B039675	6.33	WSCD2_ARTBC		MGAL_10B013155	6.94			MGAL_10B039675	6.84	WSCD2_ARTBC
MGAL_10NCA069865	-6.71			MGAL_10B049913	2.18	DAR1_DROME		MGAL_10B018297	-4.09	K1958_MOUSE		MGAL_10B049913	2.13	DAR1_DROME
MGAL_10NCA018539	-6.59			MGAL_10B055888	3.19	HSP74_ANOAL		MGAL_10B019324	7.67	KIF1A_HUMAN		MGAL_10B055888	4.19	HSP74_ANOAL
MGAL_10B056433	-6.43			MGAL_10B062935	2.06			MGAL_10B020490	1.69	ZN112_HUMAN		MGAL_10B062935	2.4
MGAL_10NCA042840	-6.33			MGAL_10B064361	1.27	HXK2_DROME		MGAL_10B020848	7.51	PIF1_SCHPO		MGAL_10B064361	0.97	HXK2_DROME
MGAL_10B049888	-6.28			MGAL_10B064973	1.93			MGAL_10B030033	-4.95			MGAL_10B064973	2.21
MGAL_10B008080	-6.21			MGAL_10B064992	9.26	CRBL2_MOUSE		MGAL_10B031596	4.39			MGAL_10B064992	8.81	CRBL2_MOUSE
MGAL_10B067403	-6.03			MGAL_10B065504	1.12	UBC_RAT		MGAL_10B031983	1.52			MGAL_10B065504	1.38	UBC_RAT
MGAL_10B011186	-5.41	Y2049_STAEQ		MGAL_10B065958	6.46	CRBL2_DANRE		MGAL_10B035923	2.92	MTR1A_MOUSE		MGAL_10B065958	5.4	CRBL2_DANRE
MGAL_10NCA040161	-5.09			MGAL_10B066001	3.49	TM205_DANRE		MGAL_10B037680	-1.98	SON_HUMAN		MGAL_10B066001	3.75	TM205_DANRE
MGAL_10B061541	-5.07			MGAL_10B067232	1.1	BTG1_MOUSE		MGAL_10B038367	4.55	TITIN_MOUSE		MGAL_10B067232	0.92	BTG1_MOUSE
MGAL_10B075010	-4.96	PGCB_MOUSE		MGAL_10B075012	1.57	KLF10_RAT		MGAL_10B038596	-5.02			MGAL_10B075012	1.34	KLF10_RAT
MGAL_10NCA068400	-4.84			MGAL_10B077170	2.31	DNJB4_HUMAN		MGAL_10B040329	-1.78	VRTN_MOUSE		MGAL_10B077170	2.35	DNJB4_HUMAN
MGAL_10NCA051870	-4.73			MGAL_10B084045	1.58	TRIB2_BOVIN		MGAL_10B043323	-4.79			MGAL_10B084045	1.27	TRIB2_BOVIN
MGAL_10B039612	-4.31			MGAL_10B084459	1.34			MGAL_10B046177	-8.91	POL2_DROME		MGAL_10B084459	1.38
MGAL_10NCA073438	-4.09			MGAL_10B085157	8.12	BIR7A_XENLA		MGAL_10B048292	-2.29	CASP2_RAT		MGAL_10B085157	7.32	BIR7A_XENLA
MGAL_10B056338	-4.04			MGAL_10B087023	1.94	C1QT6_RAT		MGAL_10B049370	1.54	CELE_ACET2		MGAL_10B087023	1.88	C1QT6_RAT
MGAL_10B084610	-3.97			MGAL_10B087440	5.92			MGAL_10B052072	-6.55	GU_CALSA		MGAL_10B087440	7.38
MGAL_10NCA044119	-3.92			MGAL_10B087938	-7.36			MGAL_10B053624	1.75	MT13_MYTED		MGAL_10B087938	-5.13
MGAL_10B002808	-3.88	OTUD3_MOUSE		MGAL_10B088438	4.44	DIAP2_DROME		MGAL_10B055014	-2.78	CENPI_CHICK		MGAL_10B088438	4.45	DIAP2_DROME
MGAL_10NCA028240	-3.68			MGAL_10B090333	1.49	EF2K_HUMAN		MGAL_10B057070	-7.52			MGAL_10B090333	1.79	EF2K_HUMAN
MGAL_10B072183	-3.62	DER_CHICK		MGAL_10B091521	3.33	DIAP2_DROME		MGAL_10B058380	1.76	PROX_ACESD		MGAL_10B091521	2.35	DIAP2_DROME
MGAL_10B092454	-3.6			MGAL_10B092187	2.12			MGAL_10B064192	0.92	KTU_XENLA		MGAL_10B092187	2
MGAL_10NCA061751	-3.55			MGAL_10B092325B	2.36	BAG4_HUMAN		MGAL_10B065166	-5.03	CLZ9_COCLU		MGAL_10B092325B	2.49	BAG4_HUMAN
MGAL_10B068937	-3.49			MGAL_10B092385	3.8			MGAL_10B067717	-0.92	AURK_EREGS		MGAL_10B092385	3.34
MGAL_10NCA015245	-3.37			MGAL_10B092649	2.82	CRBL2_XENTR		MGAL_10B069457	3.24			MGAL_10B092649	2.58	CRBL2_XENTR
MGAL_10NCA018926	-3.3			MGAL_10B093323	2.24	NFIL3_RAT		MGAL_10B075402	3.4			MGAL_10B093323	1.84	NFIL3_RAT
MGAL_10NCA062448	-3.28			MGAL_10B093598	1.99	NR0B1_MOUSE		MGAL_10B080736	-7.24			MGAL_10B093598	1.78	NR0B1_MOUSE
MGAL_10NCA015822	-3.24			MGAL_10B093873	5.1	CRBL2_BOVIN		MGAL_10B085023	-7.21			MGAL_10B093873	4.1	CRBL2_BOVIN
MGAL_10NCA028281	-3.23			MGAL_10B094162	2.07	NFIL3_RAT		MGAL_10B087040	-2.82			MGAL_10B094162	1.61	NFIL3_RAT
MGAL_10NCA024364	-3			MGAL_10NCA000170	7.96			MGAL_10B090326	2.63	ANK1_MOUSE		MGAL_10NCA000170	6.75
MGAL_10NCA036169	-2.97			MGAL_10NCA001703	2.06			MGAL_10B091779	-6.41	THAP9_HUMAN		MGAL_10NCA001703	1.99
MGAL_10NCA016978	-2.97			MGAL_10NCA004834	6.2			MGAL_10B092376	0.99	KTU_DROMO		MGAL_10NCA004834	6.32
MGAL_10B039843	-2.81			MGAL_10NCA006914	6.93			MGAL_10B092407	1.78	HES4A_XENLA		MGAL_10NCA006914	6.83
MGAL_10NCA021148	-2.6			MGAL_10NCA006917	6.71			MGAL_10B092866	-7.44			MGAL_10NCA006917	6.9
MGAL_10B083553	-2.56			MGAL_10NCA009151	5.42			MGAL_10NCA000247	7.67			MGAL_10NCA009151	5.53
MGAL_10NCA054213	-2.5			MGAL_10NCA010621	1.73			MGAL_10NCA003480	-4.45			MGAL_10NCA010621	1.41
MGAL_10NCA027284	-2.43			MGAL_10NCA011601	7.17			MGAL_10NCA005505	7.25			MGAL_10NCA011601	6.99
MGAL_10B037200	-2.42			MGAL_10NCA014929	7.84			MGAL_10NCA019010	-7.06			MGAL_10NCA014929	8.53
MGAL_10NCA056921	-2.4			MGAL_10NCA018847	1.32			MGAL_10NCA025628	-5.07			MGAL_10NCA018847	1.42
MGAL_10B038750	-2.34	CRLS1_DROME		MGAL_10NCA019120	2.28			MGAL_10NCA031244	-4.01			MGAL_10NCA019120	2.73
MGAL_10B084348	-2.33	SIAE_MOUSE		MGAL_10NCA023811	6.12			MGAL_10NCA031443	4.6			MGAL_10NCA023811	4.46
MGAL_10NCA056919	-2.18			MGAL_10NCA029489	2.17			MGAL_10NCA052027	-7.57			MGAL_10NCA029489	1.93
MGAL_10B064247	-2.15	VWDE_MOUSE		MGAL_10NCA031246	-9.43			MGAL_10NCA065652	-7.03			MGAL_10NCA031246	-9.6
MGAL_10B086448	-2.12	TMM_PELU1		MGAL_10NCA033599	4.78			MGAL_10NCA070228	-7.36			MGAL_10NCA033599	3.5
MGAL_10NCA045797	-1.9			MGAL_10NCA034137	7.87			MGAL_10NCA070680	4.2			MGAL_10NCA034137	6.53
MGAL_10B089013	-1.41	LRP_CAEEL		MGAL_10NCA034138	9.36							MGAL_10NCA034138	6.59
MGAL_10B066786	-1.25	MSIR6_DROME		MGAL_10NCA042239	7.89							MGAL_10NCA042239	6.2
MGAL_10NCA053182	-1.19			MGAL_10NCA044579	2							MGAL_10NCA044579	1.81
MGAL_10B006120	-1.14	DGCR8_MOUSE		MGAL_10NCA073437	-2.59							MGAL_10NCA073437	-2.16
MGAL_10B093224	0.86	MKX_HUMAN
MGAL_10B002921	0.93	AKIR2_XENLA
MGAL_10B017722	1	CHRB_DROPS
MGAL_10B094176	1.04	JUN_CHICK
MGAL_10B047900	1.13	DUS7_RAT
MGAL_10B070715	1.14	IKBA_CHICK
MGAL_10B007947	1.16	LIN41_CHICK
MGAL_10B010130	1.23	MT22_MYTED
MGAL_10B073736	1.28	PIM3_COTJA
MGAL_10NCA034582	1.28
MGAL_10B088399	1.37	KCNH6_CHICK
MGAL_10B028657	1.39	IER5_MOUSE
MGAL_10B078608	1.45	COL12_HUMAN
MGAL_10B079981	1.49	DUS10_MOUSE
MGAL_10B018255	1.49	PCR10_ARATH
MGAL_10B083666	1.5	GEN_HUMAN
MGAL_10NCA015087	1.53
MGAL_10B066992	1.64	SOX14_DROME
MGAL_10NCA019132	1.77
MGAL_10NCA007280	1.8
MGAL_10B004905	1.8	TRI56_BOVIN
MGAL_10B079867	1.9
MGAL_10B029737	2.04	CC175_RAT
MGAL_10NCA010893	2.18
MGAL_10B043819	2.3	CFA58_MOUSE
MGAL_10B006548	2.98	SIR7_BOVIN
MGAL_10NCA010076	3.15
MGAL_10NCA010624	3.19
MGAL_10B049865	3.33
MGAL_10B077142	3.54
MGAL_10NCA041135	3.59
MGAL_10B012690	3.89	TRMO_HUMAN
MGAL_10B048530	3.89	TRMO_HUMAN
MGAL_10B041630	4.29	BIRC7_XENTR
MGAL_10NCA065878	4.57
MGAL_10B060682	5	CCAPR_DROME
MGAL_10B085500	5.05	COCA1_HUMAN
MGAL_10NCA001578	5.07
MGAL_10B056680	5.09	DIAP1_DROME
MGAL_10B044400	5.75	VF232_IIV3
MGAL_10B050198	6.07
MGAL_10B084672	6.4	ATSL_BOMMO
MGAL_10B092530	6.64	CRBL2_MOUSE
MGAL_10NCA053809	6.69
MGAL_10B076496	6.92
MGAL_10NCA014633	6.99
MGAL_10B069620	7.15	NPHN_MOUSE
MGAL_10NCA042238	7.47
