# Supplementary material for: Effect of hypoxia and reoxygenation on the nervous system of the Mediterranean mussel Mytilus galloprovincialis
Source: Research Square preprint supplement (doi:10.21203/rs.3.rs-8775360/v1), 2026-02-16
Supplement: Supplementary file 2 [file 269f54b32e1ba61004bd4660.xlsx]

## Sheet: RNA-Seq gene list HvsN
Table S1- Genes identified by RNA-Seq comparing HvsN
RESPONSE TO HYPOXIA
MGAL_ID	baseMean	log2FoldChange	lfcSE	stat	pvalue	padj	(human) ortholog Gene Name	OFFICIAL_GENE_SYMBOL
MGAL_10B000134	372.26	1.83	0.38	4.89	1.00748e-06	0.000628473	egl-9 family hypoxia inducible factor 1	EGLN1
MGAL_10B064361	1263.94	1.27	0.24	5.36	8.30658e-08	7.06377e-05	hexokinase 2	HK2
MGAL_10B016724	257.78	3.38	0.59	5.68	1.37443e-08	1.41925e-05	Alternative oxidase, mitochondrial	AOX1
MGAL_10B056680	21.39	5.09	1.34	3.81	0.000140307	0.0315765	diaphanous related formin 1	DIAPH1
MGAL_10B091521	124.95	3.33	0.6	5.53	3.17759e-08	2.96367e-05	diaphanous related formin 2	DIAPH2
MGAL_10B088438	449.5	4.44	0.51	8.67	4.24964e-18	1.36522e-14	diaphanous related formin 2	DIAPH2
HOMEOSTASIS
MGAL_ID	baseMean	log2FoldChange	lfcSE	stat	pvalue	padj	(human) ortholog Gene Name	OFFICIAL_GENE_SYMBOL
MGAL_10B064361	1263.94	1.27	0.24	5.36	8.30658e-08	7.06377e-05	hexokinase 2	HK2
MGAL_10B056680	21.39	5.09	1.34	3.81	0.000140307	0.0315765	diaphanous related formin 1	DIAPH1
MGAL_10B091521	124.95	3.33	0.6	5.53	3.17759e-08	2.96367e-05	diaphanous related formin 2	DIAPH2
MGAL_10B088438	449.5	4.44	0.51	8.67	4.24964e-18	1.36522e-14	diaphanous related formin 2	DIAPH2
MGAL_10B079981	383.36	1.49	0.27	5.6	2.09673e-08	2.09044e-05	dual specificity phosphatase 10	DUSP10
MGAL_10B000134	372.26	1.83	0.38	4.89	1.00748e-06	0.000628473	egl-9 family hypoxia inducible factor 1	EGLN1
MGAL_10B089013	207.13	-1.41	0.38	-3.7	0.000219534	0.0421925	LDL receptor related protein 5	LRP5
MGAL_10B010130	1534.43	1.23	0.32	3.81	0.000136974	0.0311836	metallothionein 1F	MT1F
MGAL_10B073736	3352.36	1.28	0.24	5.23	1.7049e-07	0.000123235	Pim-3 proto-oncogene, serine/threonine kinase	PIM3
REGULATION OF PROTEOLYSIS
MGAL_ID	baseMean	log2FoldChange	lfcSE	stat	pvalue	padj	(human) ortholog Gene Name	OFFICIAL_GENE_SYMBOL
MGAL_10B041630	48.48	4.29	0.94	4.59	4.41703e-06	0.00214969	baculoviral IAP repeat containing 7	BIRC7
MGAL_10B034053	19.24	7.74	1.7	4.55	5.41974e-06	0.00255639	baculoviral IAP repeat containing 7	BIRC7
MGAL_10B085157	24.67	8.12	1.54	5.29	1.20916e-07	9.20014e-05	baculoviral IAP repeat containing 7	BIRC7
MGAL_10B023412	292.27	8.94	0.84	10.64	1.91484e-26	9.22729e-23	baculoviral IAP repeat containing 7	BIRC7
MGAL_10B055888	147.37	3.19	0.53	5.98	2.17302e-09	2.61786e-06	heat shock protein family A (Hsp70) member 4	HSPA4
MGAL_10B021844	139.11	7.02	0.9	7.77	8.02139e-15	1.36425e-11	heat shock protein family A (Hsp70) member 4	HSPA4
MGAL_10B002808	56.12	-3.88	0.82	-4.73	2.20903e-06	0.00118277	OTU deubiquitinase 3	OTUD3
MGAL_10B084045	572.02	1.58	0.33	4.8	1.60832e-06	0.000949009	tribbles pseudokinase 2	TRIB2
MGAL_10B065504	3835.95	1.12	0.28	4.03	5.56269e-05	0.0169184	ubiquitin C	UBC
CELL DEATH
	baseMean	log2FoldChange	lfcSE	stat	pvalue	padj	(human) ortholog Gene Name	OFFICIAL_GENE_SYMBOL
MGAL_10B092325B	228.61	2.36	0.56	4.23	2.35608e-05	0.00830748	BAG cochaperone 4	BAG4
MGAL_10B041630	48.48	4.29	0.94	4.59	4.41703e-06	0.00214969	baculoviral IAP repeat containing 7	BIRC7
MGAL_10B034053	19.24	7.74	1.7	4.55	5.41974e-06	0.00255639	baculoviral IAP repeat containing 7	BIRC7
MGAL_10B085157	24.67	8.12	1.54	5.29	1.20916e-07	9.20014e-05	baculoviral IAP repeat containing 7	BIRC7
MGAL_10B023412	292.27	8.94	0.84	10.64	1.91484e-26	9.22729e-23	baculoviral IAP repeat containing 7	BIRC7
MGAL_10B040989	457.29	-1.77	0.35	-5.13	2.94001e-07	0.000207328	BRCA1 DNA repair associated	BRCA1
MGAL_10B067232	1301.73	1.1	0.24	4.51	6.40234e-06	0.00293827	BTG anti-proliferation factor 1	BTG1
MGAL_10B056680	21.39	5.09	1.34	3.81	0.000140307	0.0315765	diaphanous related formin 1	DIAPH1
MGAL_10B091521	124.95	3.33	0.6	5.53	3.17759e-08	2.96367e-05	diaphanous related formin 2	DIAPH2
MGAL_10B088438	449.5	4.44	0.51	8.67	4.24964e-18	1.36522e-14	diaphanous related formin 2	DIAPH2
MGAL_10B090333	428.67	1.49	0.39	3.81	0.000140955	0.0315765	eukaryotic elongation factor 2 kinase	EEF2K
MGAL_10B000134	372.26	1.83	0.38	4.89	1.00748e-06	0.000628473	egl-9 family hypoxia inducible factor 1	EGLN1
MGAL_10B094176	920.54	1.04	0.28	3.69	0.000225749	0.0425919	Jun proto-oncogene, AP-1 transcription factor subunit	JUN
MGAL_10B009328	197.15	2.59	0.52	5.03	5.02424e-07	0.00033015	galectin 2	LGALS2
MGAL_10B089013	207.13	-1.41	0.38	-3.7	0.000219534	0.0421925	LDL receptor related protein 5	LRP5
MGAL_10B070715	801.61	1.14	0.27	4.22	2.48693e-05	0.00866321	NFKB inhibitor alpha	NFKBIA
MGAL_10B013199	76.32	3.64	0.62	5.92	3.24356e-09	3.75125e-06	Putative inhibitor of apoptosis	PIAP
MGAL_10B073736	3352.36	1.28	0.24	5.23	1.7049e-07	0.000123235	Pim-3 proto-oncogene, serine/threonine kinase	PIM3
MGAL_10B084045	572.02	1.58	0.33	4.8	1.60832e-06	0.000949009	tribbles pseudokinase 2	TRIB2
CELLULAR RESPONSE TO CYTOKINES
	baseMean	log2FoldChange	lfcSE	stat	pvalue	padj	(human) ortholog Gene Name	OFFICIAL_GENE_SYMBOL
MGAL_10B002921	552.14	0.93	0.24	3.95	7.90004e-05	0.0205778	akirin 2	AKIRIN2
MGAL_10B092325B	228.61	2.36	0.56	4.23	2.35608e-05	0.00830748	BAG cochaperone 4	BAG4
MGAL_10B041630	48.48	4.29	0.94	4.59	4.41703e-06	0.00214969	baculoviral IAP repeat containing 7	BIRC7
MGAL_10B034053	19.24	7.74	1.7	4.55	5.41974e-06	0.00255639	baculoviral IAP repeat containing 7	BIRC7
MGAL_10B085157	24.67	8.12	1.54	5.29	1.20916e-07	9.20014e-05	baculoviral IAP repeat containing 7	BIRC7
MGAL_10B023412	292.27	8.94	0.84	10.64	1.91484e-26	9.22729e-23	baculoviral IAP repeat containing 7	BIRC7
MGAL_10B040989	457.29	-1.77	0.35	-5.13	2.94001e-07	0.000207328	BRCA1 DNA repair associated	BRCA1
MGAL_10B064361	1263.94	1.27	0.24	5.36	8.30658e-08	7.06377e-05	hexokinase 2	HK2
MGAL_10B094162	516.47	2.07	0.27	7.71	1.21659e-14	1.95418e-11	nuclear factor, interleukin 3 regulated	NFIL3
MGAL_10B093323	238.74	2.24	0.39	5.76	8.6573e-09	9.62725e-06	nuclear factor, interleukin 3 regulated	NFIL3
MGAL_10B070715	801.61	1.14	0.27	4.22	2.48693e-05	0.00866321	NFKB inhibitor alpha	NFKBIA
MGAL_10B004905	84.73	1.8	0.49	3.66	0.000252395	0.0454992	tripartite motif containing 56	TRIM56
REGULATION OF PROLIFERATION
	baseMean	log2FoldChange	lfcSE	stat	pvalue	padj	(human) ortholog Gene Name	OFFICIAL_GENE_SYMBOL
MGAL_10B002921	552.14	0.93	0.24	3.95	7.90004e-05	0.0205778	akirin 2	AKIRIN2
MGAL_10B075010	40.7	-4.96	1.32	-3.75	0.000175004	0.0374806	brevican	BCAN
MGAL_10B041630	48.48	4.29	0.94	4.59	4.41703e-06	0.00214969	baculoviral IAP repeat containing 7	BIRC7
MGAL_10B034053	19.24	7.74	1.7	4.55	5.41974e-06	0.00255639	baculoviral IAP repeat containing 7	BIRC7
MGAL_10B085157	24.67	8.12	1.54	5.29	1.20916e-07	9.20014e-05	baculoviral IAP repeat containing 7	BIRC7
MGAL_10B023412	292.27	8.94	0.84	10.64	1.91484e-26	9.22729e-23	baculoviral IAP repeat containing 7	BIRC7
MGAL_10B067232	1301.73	1.1	0.24	4.51	6.40234e-06	0.00293827	BTG anti-proliferation factor 1	BTG1
MGAL_10B006120	327.24	-1.14	0.29	-3.9	9.42786e-05	0.0232981	DGCR8 microprocessor complex subunit	DGCR8
MGAL_10B079981	383.36	1.49	0.27	5.6	2.09673e-08	2.09044e-05	dual specificity phosphatase 10	DUSP10
MGAL_10B047900	611.05	1.13	0.28	4.01	6.05928e-05	0.018061	dual specificity phosphatase 7	DUSP7
MGAL_10B090333	428.67	1.49	0.39	3.81	0.000140955	0.0315765	eukaryotic elongation factor 2 kinase	EEF2K
MGAL_10B028657	706.13	1.39	0.28	5.03	4.97452e-07	0.00033015	immediate early response 5	IER5
MGAL_10B094176	920.54	1.04	0.28	3.69	0.000225749	0.0425919	Jun proto-oncogene, AP-1 transcription factor subunit	JUN
MGAL_10B075012	497.41	1.57	0.36	4.36	1.30131e-05	0.00515407	KLF transcription factor 10	KLF10
MGAL_10B089013	207.13	-1.41	0.38	-3.7	0.000219534	0.0421925	LDL receptor related protein 5	LRP5
MGAL_10B070715	801.61	1.14	0.27	4.22	2.48693e-05	0.00866321	NFKB inhibitor alpha	NFKBIA
MGAL_10B084045	572.02	1.58	0.33	4.8	1.60832e-06	0.000949009	tribbles pseudokinase 2	TRIB2
MGAL_10B007947	763.8	1.16	0.27	4.38	1.19863e-05	0.00481335	tripartite motif containing 71	TRIM71
RNA METABOLIC PROCESS
	baseMean	log2FoldChange	lfcSE	stat	pvalue	padj	(human) ortholog Gene Name	OFFICIAL_GENE_SYMBOL
MGAL_10B002921	552.14	0.93	0.24	3.95	7.90004e-05	0.0205778	akirin 2	AKIRIN2
MGAL_10B092325B	228.61	2.36	0.56	4.23	2.35608e-05	0.00830748	BAG cochaperone 4	BAG4
MGAL_10B040989	457.29	-1.77	0.35	-5.13	2.94001e-07	0.000207328	BRCA1 DNA repair associated	BRCA1
MGAL_10B077170	4859.29	2.31	0.22	10.59	3.46146e-26	1.42973e-22	DnaJ heat shock protein family (Hsp40) member B4	DNAJB4
MGAL_10B094176	920.54	1.04	0.28	3.69	0.000225749	0.0425919	Jun proto-oncogene, AP-1 transcription factor subunit	JUN
MGAL_10B075012	497.41	1.57	0.36	4.36	1.30131e-05	0.00515407	KLF transcription factor 10	KLF10
MGAL_10B094162	516.47	2.07	0.27	7.71	1.21659e-14	1.95418e-11	nuclear factor, interleukin 3 regulated	NFIL3
MGAL_10B093323	238.74	2.24	0.39	5.76	8.6573e-09	9.62725e-06	nuclear factor, interleukin 3 regulated	NFIL3
MGAL_10B093598	2194.57	1.99	0.24	8.23	1.87564e-16	4.5192e-13	nuclear receptor subfamily 0 group B member 1	NR0B1
MGAL_10B006548	35.99	2.98	0.74	4.03	5.61743e-05	0.0169184	sirtuin 7	SIRT7
MGAL_10B066992	270.56	1.64	0.31	5.34	9.07491e-08	7.28841e-05	SRY-box transcription factor 14	SOX14
MGAL_10B007947	763.8	1.16	0.27	4.38	1.19863e-05	0.00481335	tripartite motif containing 71	TRIM71
MITOCHONDRIA
	baseMean	log2FoldChange	lfcSE	stat	pvalue	padj	(human) ortholog Gene Name	OFFICIAL_GENE_SYMBOL
MGAL_10B016724	257.78	3.38	0.59	5.68	1.37443e-08	1.41925e-05	Alternative oxidase, mitochondrial	AOX1
MGAL_10B092325B	228.61	2.36	0.56	4.23	2.35608e-05	0.00830748	BAG cochaperone 4	BAG4
MGAL_10B043819	40.96	2.3	0.62	3.69	0.000227962	0.0425919	cilia and flagella associated protein 58	CFAP58
MGAL_10B038750	65.34	-2.34	0.53	-4.39	1.13593e-05	0.00469189	cardiolipin synthase 1	CRLS1
MGAL_10B056680	21.39	5.09	1.34	3.81	0.000140307	0.0315765	diaphanous related formin 1	DIAPH1
MGAL_10B091521	124.95	3.33	0.6	5.53	3.17759e-08	2.96367e-05	diaphanous related formin 2	DIAPH2
MGAL_10B088438	449.5	4.44	0.51	8.67	4.24964e-18	1.36522e-14	diaphanous related formin 2	DIAPH2
MGAL_10B077170	4859.29	2.31	0.22	10.59	3.46146e-26	1.42973e-22	DnaJ heat shock protein family (Hsp40) member B4	DNAJB4
MGAL_10B064361	1263.94	1.27	0.24	5.36	8.30658e-08	7.06377e-05	hexokinase 2	HK2
MGAL_10B055888	147.37	3.19	0.53	5.98	2.17302e-09	2.61786e-06	heat shock protein family A (Hsp70) member 4	HSPA4
MGAL_10B021844	139.11	7.02	0.9	7.77	8.02139e-15	1.36425e-11	heat shock protein family A (Hsp70) member 4	HSPA4
MGAL_10B028657	706.13	1.39	0.28	5.03	4.97452e-07	0.00033015	immediate early response 5	IER5
MGAL_10B006548	35.99	2.98	0.74	4.03	5.61743e-05	0.0169184	sirtuin 7	SIRT7
MGAL_10B065504	3835.95	1.12	0.28	4.03	5.56269e-05	0.0169184	ubiquitin C	UBC

## Sheet: RNA-Seq gene list RvsN
Table S1- Genes identified by RNA-Seq comparing RvsN
RESPONSE TO HYPOXIA
MGAL_ID	baseMean	log2FoldChange	lfcSE	stat	pvalue	padj	(human) ortholog Gene Name	OFFICIAL_GENE_SYMBOL
MGAL_10B016724	257.78	3.13	0.59	5.27	1.36554e-07	0.000146229	Alternative oxidase, mitochondrial	AOX1
MGAL_10B091521	124.95	2.35	0.6	3.89	0.000101157	0.0332359	diaphanous related formin 2	DIAPH2
MGAL_10B088438	449.5	4.45	0.51	8.69	3.49268e-18	1.44263e-14	diaphanous related formin 2	DIAPH2
MGAL_10B000134	372.26	1.87	0.37	4.98	6.37278e-07	0.000614187	egl-9 family hypoxia inducible factor 1	EGLN1
MGAL_10B064361	1263.94	0.97	0.24	4.08	4.58648e-05	0.0195013	hexokinase 2	HK2
HOMEOSTASIS
MGAL_ID	baseMean	log2FoldChange	lfcSE	stat	pvalue	padj	(human) ortholog Gene Name	OFFICIAL_GENE_SYMBOL
MGAL_10B091521	124.95	2.35	0.6	3.89	0.000101157	0.0332359	diaphanous related formin 2	DIAPH2
MGAL_10B088438	449.5	4.45	0.51	8.69	3.49268e-18	1.44263e-14	diaphanous related formin 2	DIAPH2
MGAL_10B000134	372.26	1.87	0.37	4.98	6.37278e-07	0.000614187	egl-9 family hypoxia inducible factor 1	EGLN1
MGAL_10B064361	1263.94	0.97	0.24	4.08	4.58648e-05	0.0195013	hexokinase 2	HK2
MGAL_10B053624	1154.18	1.75	0.45	3.85	0.000115891	0.0364212	metallothionein 1H	MT1H
REGULATION OF PROTEOLYSIS
MGAL_ID	baseMean	log2FoldChange	lfcSE	stat	pvalue	padj	(human) ortholog Gene Name	OFFICIAL_GENE_SYMBOL
MGAL_10B034053	19.24	6.86	1.71	4.02	5.89401e-05	0.0243448	baculoviral IAP repeat containing 7	BIRC7
MGAL_10B085157	24.67	7.32	1.54	4.76	1.95727e-06	0.00158134	baculoviral IAP repeat containing 7	BIRC7
MGAL_10B023412	292.27	7.95	0.84	9.46	3.13643e-21	1.81367e-17	baculoviral IAP repeat containing 7	BIRC7
MGAL_10B055888	147.37	4.19	0.53	7.91	2.64549e-15	5.09928e-12	heat shock protein family A (Hsp70) member 4	HSPA4
MGAL_10B021844	139.11	7.58	0.9	8.4	4.54904e-17	1.09605e-13	heat shock protein family A (Hsp70) member 4	HSPA4
MGAL_10B084045	572.02	1.27	0.33	3.87	0.000110622	0.0354294	tribbles pseudokinase 2	TRIB2
MGAL_10B065504	3835.95	1.38	0.28	4.97	6.63826e-07	0.000619135	ubiquitin C	UBC
CELL DEATH
	baseMean	log2FoldChange	lfcSE	stat	pvalue	padj	(human) ortholog Gene Name	OFFICIAL_GENE_SYMBOL
MGAL_10B092325B	228.61	2.49	0.56	4.47	7.97878e-06	0.00501501	BAG cochaperone 4	BAG4
MGAL_10B034053	19.24	6.86	1.71	4.02	5.89401e-05	0.0243448	baculoviral IAP repeat containing 7	BIRC7
MGAL_10B085157	24.67	7.32	1.54	4.76	1.95727e-06	0.00158134	baculoviral IAP repeat containing 7	BIRC7
MGAL_10B023412	292.27	7.95	0.84	9.46	3.13643e-21	1.81367e-17	baculoviral IAP repeat containing 7	BIRC7
MGAL_10B067232	1301.73	0.92	0.24	3.77	0.000161138	0.0443712	BTG anti-proliferation factor 1	BTG1
MGAL_10B091521	124.95	2.35	0.6	3.89	0.000101157	0.0332359	diaphanous related formin 2	DIAPH2
MGAL_10B088438	449.5	4.45	0.51	8.69	3.49268e-18	1.44263e-14	diaphanous related formin 2	DIAPH2
MGAL_10B090333	428.67	1.79	0.39	4.58	4.59963e-06	0.00316641	eukaryotic elongation factor 2 kinase	EEF2K
MGAL_10B000134	372.26	1.87	0.37	4.98	6.37278e-07	0.000614187	egl-9 family hypoxia inducible factor 1	EGLN1
MGAL_10B009328	197.15	2.15	0.52	4.16	3.2125e-05	0.0154805	galectin 2	LGALS2
MGAL_10B013199	76.32	2.94	0.62	4.76	1.95252e-06	0.00158134	Putative inhibitor of apoptosis	PIAP
MGAL_10B037680	384.52	-1.98	0.5	-3.96	7.42455e-05	0.0275213	SON DNA and RNA binding protein	SON
MGAL_10B084045	572.02	1.27	0.33	3.87	0.000110622	0.0354294	tribbles pseudokinase 2	TRIB2
CELLULAR RESPONSE TO CYTOKINES
	baseMean	log2FoldChange	lfcSE	stat	pvalue	padj	(human) ortholog Gene Name	OFFICIAL_GENE_SYMBOL
MGAL_10B092325B	228.61	2.49	0.56	4.47	7.97878e-06	0.00501501	BAG cochaperone 4	BAG4
MGAL_10B034053	19.24	6.86	1.71	4.02	5.89401e-05	0.0243448	baculoviral IAP repeat containing 7	BIRC7
MGAL_10B085157	24.67	7.32	1.54	4.76	1.95727e-06	0.00158134	baculoviral IAP repeat containing 7	BIRC7
MGAL_10B023412	292.27	7.95	0.84	9.46	3.13643e-21	1.81367e-17	baculoviral IAP repeat containing 7	BIRC7
MGAL_10B064361	1263.94	0.97	0.24	4.08	4.58648e-05	0.0195013	hexokinase 2	HK2
MGAL_10B094162	516.47	1.61	0.27	5.99	2.15873e-09	2.60065e-06	nuclear factor, interleukin 3 regulated	NFIL3
MGAL_10B093323	238.74	1.84	0.39	4.71	2.51668e-06	0.00196661	nuclear factor, interleukin 3 regulated	NFIL3
REGULATION OF PROLIFERATION
	baseMean	log2FoldChange	lfcSE	stat	pvalue	padj	(human) ortholog Gene Name	OFFICIAL_GENE_SYMBOL
MGAL_10B034053	19.24	6.86	1.71	4.02	5.89401e-05	0.0243448	baculoviral IAP repeat containing 7	BIRC7
MGAL_10B085157	24.67	7.32	1.54	4.76	1.95727e-06	0.00158134	baculoviral IAP repeat containing 7	BIRC7
MGAL_10B023412	292.27	7.95	0.84	9.46	3.13643e-21	1.81367e-17	baculoviral IAP repeat containing 7	BIRC7
MGAL_10B067232	1301.73	0.92	0.24	3.77	0.000161138	0.0443712	BTG anti-proliferation factor 1	BTG1
MGAL_10B090333	428.67	1.79	0.39	4.58	4.59963e-06	0.00316641	eukaryotic elongation factor 2 kinase	EEF2K
MGAL_10B075012	497.41	1.34	0.36	3.73	0.000192858	0.0495798	KLF transcription factor 10	KLF10
MGAL_10B084045	572.02	1.27	0.33	3.87	0.000110622	0.0354294	tribbles pseudokinase 2	TRIB2
RNA METABOLIC PROCESS
	baseMean	log2FoldChange	lfcSE	stat	pvalue	padj	(human) ortholog Gene Name	OFFICIAL_GENE_SYMBOL
MGAL_10B092325B	228.61	2.49	0.56	4.47	7.97878e-06	0.00501501	BAG cochaperone 4	BAG4
MGAL_10B077170	4859.29	2.35	0.22	10.76	5.19477e-27	7.50982e-23	DnaJ heat shock protein family (Hsp40) member B4	DNAJB4
MGAL_10B075012	497.41	1.34	0.36	3.73	0.000192858	0.0495798	KLF transcription factor 10	KLF10
MGAL_10B094162	516.47	1.61	0.27	5.99	2.15873e-09	2.60065e-06	nuclear factor, interleukin 3 regulated	NFIL3
MGAL_10B093323	238.74	1.84	0.39	4.71	2.51668e-06	0.00196661	nuclear factor, interleukin 3 regulated	NFIL3
MGAL_10B093598	2194.57	1.78	0.24	7.34	2.08007e-13	3.16532e-10	nuclear receptor subfamily 0 group B member 1	NR0B1
MGAL_10B037680	384.52	-1.98	0.5	-3.96	7.42455e-05	0.0275213	SON DNA and RNA binding protein	SON
MGAL_10B004162	8.61	-6.65	1.76	-3.78	0.000159942	0.0443712	tripartite motif containing 28	TRIM28
MITOCHONDRIA
	baseMean	log2FoldChange	lfcSE	stat	pvalue	padj	(human) ortholog Gene Name	OFFICIAL_GENE_SYMBOL
MGAL_10B016724	257.78	3.13	0.59	5.27	1.36554e-07	0.000146229	Alternative oxidase, mitochondrial	AOX1
MGAL_10B092325B	228.61	2.49	0.56	4.47	7.97878e-06	0.00501501	BAG cochaperone 4	BAG4
MGAL_10B091521	124.95	2.35	0.6	3.89	0.000101157	0.0332359	diaphanous related formin 2	DIAPH2
MGAL_10B088438	449.5	4.45	0.51	8.69	3.49268e-18	1.44263e-14	diaphanous related formin 2	DIAPH2
MGAL_10B064361	1263.94	0.97	0.24	4.08	4.58648e-05	0.0195013	hexokinase 2	HK2
MGAL_10B055888	147.37	4.19	0.53	7.91	2.64549e-15	5.09928e-12	heat shock protein family A (Hsp70) member 4	HSPA4
MGAL_10B021844	139.11	7.58	0.9	8.4	4.54904e-17	1.09605e-13	heat shock protein family A (Hsp70) member 4	HSPA4
MGAL_10B020848	12.76	7.51	1.69	4.45	8.60656e-06	0.0052945	PIF1 5'-to-3' DNA helicase	PIF1
MGAL_10B065504	3835.95	1.38	0.28	4.97	6.63826e-07	0.000619135	ubiquitin C	UBC
