# Supplementary material for: Effect of hypoxia and reoxygenation on the nervous system of the Mediterranean mussel Mytilus galloprovincialis
Source: Research Square preprint supplement (doi:10.21203/rs.3.rs-8775360/v1), 2026-02-16
Supplement: Supplementary file 3 [file 57c565846057d75faae8d933.xlsx]

## Sheet: small RNA-Seq gene list HvsN
Table S2- miRNAs identified by miRNA-Seq comparing HvsN
miRNA	baseMean	log2FoldChange	lfcSE	stat	pvalue	padj
mga-nov-7	7744.46	-0.92449	0.28165	-3.28241	0.00102925	0.0684454
mga-miR-1989_5p	480.615	1.49226	0.432983	3.44646	0.000567993	0.0684454
mga-nov-14	1297.98	-1.14747	0.43567	-2.6338	0.00844358	0.374332
mga-miR-33-P1_5p	232.42	0.916551	0.364811	2.5124	0.0119912	0.398709
mga-denovo-3-3p	926.09	0.658088	0.30001	2.19355	0.0282676	0.62432
mga-miR-10-P6_5p-1	329.302	0.623653	0.290346	2.14796	0.0317166	0.62432
mga-miR-96-P3_5p	42.2389	-1.46596	0.687019	-2.1338	0.0328589	0.62432
mga-miR-10-P6_5p	2151.83	0.558477	0.268982	2.07626	0.0378695	0.62958
mga-miR-1994-P1_3p	2968.97	1.01577	0.598131	1.69825	0.0894615	0.865697
mga-miR-219_3p	5125.3	0.38655	0.230097	1.67994	0.0929689	0.865697
mga-denovo-2-5p	1621.57	0.529201	0.325645	1.62509	0.104144	0.865697
mga-miR-375_3p	419.343	0.676196	0.403273	1.67677	0.0935879	0.865697
mga-miR-1994-P1_3p-1	144.312	1.11062	0.679072	1.6355	0.101944	0.865697
mga-nov-18	194.152	-0.624531	0.380812	-1.64	0.101006	0.865697
mga-nov-20	227.389	-0.697302	0.41116	-1.69594	0.0898976	0.865697
mga-miR-242_5p	8.37154	-2.32727	1.32973	-1.75019	0.0800863	0.865697
mga-denovo-13-5p	1135.84	0.477423	0.305238	1.5641	0.117794	0.921561
mga-miR-1992_3p	944.255	0.457062	0.299023	1.52852	0.126384	0.933836
mga-miR-76_3p	930193	0.0474595	0.362063	0.131081	0.895711	0.990435
mga-let-7_5p	658994	-0.0999369	0.2997	-0.333456	0.73879	0.990435
mga-miR-10-P2_5p	614106	-0.135418	0.25754	-0.525813	0.599018	0.990435
mga-miR-87-o29_3p	349367	-0.0115311	0.246011	-0.0468724	0.962615	0.990435
mga-miR-67_3p	208864	-0.170303	0.344701	-0.494062	0.621263	0.990435
mga-Bantam_3p	210317	0.0413666	0.252385	0.163902	0.869808	0.990435
mga-miR-22-P1_3p	310878	0.0767219	0.266491	0.287897	0.773426	0.990435
mga-miR-315_5p	142870	-0.215318	0.318458	-0.676127	0.49896	0.990435
mga-miR-153-P1_3p	119295	0.114078	0.25152	0.453554	0.65015	0.990435
mga-miR-67_3p-1	127994	-0.0811301	0.279695	-0.290066	0.771766	0.990435
mga-miR-124_3p	90424.2	0.393701	0.294004	1.3391	0.180538	0.990435
mga-denovo-8-5p	88561.8	-0.197591	0.237056	-0.833521	0.404551	0.990435
mga-miR-71_5p	95878.9	-0.0921596	0.340803	-0.270419	0.786838	0.990435
mga-nov-2	57076.1	-0.143845	0.433024	-0.332188	0.739748	0.990435
mga-miR-2-P1-v1_3p	66174.1	-0.106725	0.240291	-0.444148	0.656935	0.990435
mga-miR-29-P2_3p	46818.7	-0.151265	0.285663	-0.529522	0.596443	0.990435
mga-miR-2-o54_3p	31333.8	0.33113	0.318264	1.04043	0.298142	0.990435
mga-miR-1_3p	21084.4	-0.268544	0.347337	-0.77315	0.439434	0.990435
mga-miR-8_3p	36171.6	-0.120053	0.26238	-0.457553	0.647274	0.990435
mga-miR-2-P12a_3p	32463.3	-0.0840918	0.246148	-0.341631	0.732628	0.990435
mga-nov-3	21893.9	0.296775	0.27184	1.09173	0.274953	0.990435
mga-miR-22-P2_3p	42880.9	0.121277	0.301096	0.402786	0.687106	0.990435
mga-miR-96-P1h_5p	29680	-0.153629	0.349041	-0.440144	0.659833	0.990435
mga-miR-7_5p	19987.9	-0.370549	0.353312	-1.04879	0.294276	0.990435
mga-miR-2-o24_3p	19787.7	-0.0405738	0.242246	-0.16749	0.866984	0.990435
mga-miR-67-v1_3p	16055.1	-0.0798369	0.323855	-0.24652	0.805279	0.990435
mga-miR-317-P8_3p	19779.9	-0.00281354	0.234684	-0.0119886	0.990435	0.990435
mga-miR-96-P1i_5p	12721.9	-0.0731605	0.287786	-0.254218	0.799327	0.990435
mga-miR-1984-P1_5p	15853.2	-0.162176	0.332211	-0.488172	0.625428	0.990435
mga-miR-34_5p	12638.1	-0.0506188	0.287624	-0.175989	0.860302	0.990435
mga-denovo-11-5p	10854.3	-0.146585	0.318118	-0.460787	0.644951	0.990435
mga-miR-96-P2_5p	10067.4	0.197017	0.324695	0.606773	0.544001	0.990435
mga-miR-2722_5p	6909.63	0.203207	0.252041	0.806248	0.4201	0.990435
mga-miR-190_5p	7736.62	0.471125	0.347424	1.35605	0.175082	0.990435
mga-miR-9-o18_3p	8379.71	-0.176823	0.288326	-0.613273	0.539696	0.990435
mga-miR-1984-P2_5p	7153.14	-0.0279779	0.243913	-0.114704	0.908679	0.990435
mga-nov-5	9545.79	0.0794861	0.261496	0.303967	0.761153	0.990435
mga-miR-67-P5_3p	5466.52	-0.0713356	0.321933	-0.221585	0.824637	0.990435
mga-miR-193-P1m_3p	6448.9	-0.268228	0.281409	-0.953161	0.340508	0.990435
mga-nov-6	4699.87	-0.0167581	0.261128	-0.0641758	0.94883	0.990435
mga-miR-750_3p	3932.05	-0.0488659	0.427376	-0.114339	0.908969	0.990435
mga-miR-1994-P2_3p	1540.13	1.01161	0.880927	1.14834	0.250826	0.990435
mga-miR-12_5p	2882.31	0.0286429	0.284146	0.100803	0.919707	0.990435
mga-miR-29-P1b-v1_3p	2233.55	0.329434	0.289637	1.1374	0.255371	0.990435
mga-miR-9-P10a_5p	4364.79	0.0955466	0.291918	0.327307	0.743436	0.990435
mga-miR-133_3p	1242.32	0.295113	0.565768	0.521615	0.601938	0.990435
mga-Novel-1_5p	3138.35	0.171221	0.27533	0.621874	0.534024	0.990435
mga-miR-279-P2_3p	2430.01	-0.416466	0.466825	-0.892125	0.372326	0.990435
mga-miR-29-P1b-v1_3p-1	2445.95	0.0669723	0.248723	0.269265	0.787726	0.990435
mga-miR-10-P1c-v1_5p	3980.09	-0.0432684	0.30927	-0.139905	0.888735	0.990435
mga-nov-8	4673.67	-0.371376	0.325881	-1.1396	0.254451	0.990435
mga-miR-2722_3p	4549.04	-0.302465	0.373305	-0.810235	0.417805	0.990435
mga-nov-10	3993.37	0.578353	0.479968	1.20498	0.22821	0.990435
mga-miR-153_5p	2056.09	0.0774874	0.280107	0.276635	0.78206	0.990435
mga-miR-137-P11_3p	1932.88	0.143458	0.299014	0.47977	0.631391	0.990435
mga-nov-12	1031.45	-0.0446688	0.415534	-0.107497	0.914394	0.990435
mga-miR-92-P3_3p	1123.89	-0.178606	0.283093	-0.630908	0.528101	0.990435
mga-miR-1175_3p	796.73	-0.0117285	0.485083	-0.0241784	0.98071	0.990435
mga-miR-216-P1_5p	643.702	-0.146607	0.438967	-0.333982	0.738393	0.990435
mga-miR-216-P2d_3p	1228.89	-0.135404	0.284058	-0.47668	0.63359	0.990435
mga-miR-2-P1-v1_3p-1	562.621	0.387342	0.33006	1.17355	0.240575	0.990435
mga-miR-1990-P2_3p	1290.12	-0.0989	0.304502	-0.324793	0.745338	0.990435
mga-miR-2-P4-v1_3p	891.721	0.160141	0.264184	0.606174	0.544399	0.990435
mga-nov-15	1252.38	-0.240467	0.388129	-0.619554	0.535552	0.990435
mga-denovo-14-5p	595.613	0.107301	0.330382	0.324779	0.745348	0.990435
mga-miR-2-o36_3p	599.13	-0.110211	0.285206	-0.386425	0.699182	0.990435
mga-miR-92-o140_3p	576.435	-0.258305	0.337975	-0.764272	0.444705	0.990435
mga-miR-92-P4_3p	936.836	-0.453181	0.418979	-1.08163	0.279416	0.990435
mga-miR-219_5p	542.222	0.0657235	0.41621	0.157909	0.874528	0.990435
mga-nov-17	379.562	-0.132015	0.314755	-0.419421	0.674909	0.990435
mga-miR-96-P1_5p	416.807	0.319984	0.339031	0.943818	0.345263	0.990435
mga-miR-2001_5p	384.337	0.125582	0.470837	0.26672	0.789685	0.990435
mga-miR-216-P2c_5p	251.689	0.228765	0.365204	0.626403	0.53105	0.990435
mga-miR-1993_3p	139.191	0.0720896	0.646975	0.111426	0.911279	0.990435
mga-nov-19	141.322	-0.233467	0.478232	-0.488187	0.625417	0.990435
mga-miR-277_3p	106.413	0.445257	0.435809	1.02168	0.306932	0.990435
mga-nov-21	142.697	-0.0982747	0.480673	-0.204452	0.838	0.990435
mga-miR-29-P2_3p-1	77.5759	-0.300481	0.413923	-0.725934	0.467879	0.990435
mga-nov-22	99.6643	-0.408783	0.446702	-0.915113	0.360132	0.990435
mga-miR-10-P5_5p	125.767	-0.622554	0.44238	-1.40728	0.159344	0.990435
mga-denovo-4-5p	158.419	-0.977132	1.13779	-0.858799	0.390451	0.990435
mga-nov-24	72.6779	0.335363	0.492029	0.681593	0.495497	0.990435
mga-nov-25	29.1893	0.632469	1.09296	0.578676	0.562808	0.990435
mga-nov-26	23.175	0.270618	0.70762	0.382434	0.70214	0.990435
mga-nov-27	25.6486	-0.325111	0.720292	-0.45136	0.65173	0.990435
mga-nov-28	28.2888	0.0820682	0.610074	0.134522	0.89299	0.990435
mga-nov-29	23.3185	0.450083	0.715354	0.629175	0.529235	0.990435
mga-nov-30	29.6864	-0.984669	0.677139	-1.45416	0.145902	0.990435
mga-nov-31	23.6222	-0.0602128	0.638013	-0.0943755	0.924811	0.990435
mga-nov-32	24.0903	0.109785	0.668432	0.164243	0.86954	0.990435
mga-nov-33	19.5017	0.439213	0.722962	0.607519	0.543507	0.990435
mga-nov-34	17.1484	1.12175	1.06333	1.05494	0.291452	0.990435
mga-miR-281_3p	54.1646	0.316083	0.724626	0.436201	0.662691	0.990435
mga-denovo-7-3p	12.2175	0.270628	0.855888	0.316195	0.751854	0.990435
mga-denovo-1-5p	23.5691	1.18156	0.920225	1.284	0.199143	0.990435
mga-nov-37	18.3245	-0.597401	0.700806	-0.852448	0.393965	0.990435
mga-miR-29-P1b-v1_3p-2	7.29325	0.0630845	1.00747	0.0626167	0.950072	0.990435
mga-nov-38	15.7118	-0.0156634	0.851799	-0.0183886	0.985329	0.990435
mga-denovo-10-5p	22.0079	-0.473877	1.18561	-0.399689	0.689385	0.990435
mga-miR-1986-P1_3p	5.62017	-0.142964	1.34809	-0.106049	0.915544	0.990435
mga-denovo-9-5p	9.4812	-0.465773	0.940279	-0.495356	0.620349	0.990435
mga-nov-41	11.0056	-0.510615	0.847825	-0.602264	0.546998	0.990435
mga-nov-42	4.03494	-0.734009	1.98745	-0.369323	0.711887	0.990435
mga-miR-96-P1i_5p-1	5.55408	0.043588	1.12038	0.0389046	0.968966	0.990435
mga-miR-29-P2_3p-2	7.47655	0.062878	1.04746	0.0600291	0.952132	0.990435
mga-miR-193-P1_3p	9.86206	0.0747184	0.927267	0.0805792	0.935777	0.990435
mga-nov-44	6.62701	-0.577101	1.07964	-0.53453	0.592975	0.990435
mga-miR-1-P1_3p	5.00244	0.0244975	1.24752	0.0196369	0.984333	0.990435
mga-denovo-6-5p	8.77867	-1.47026	1.09995	-1.33666	0.181334	0.990435
mga-denovo-6-3p	6.2625	-0.231743	1.28732	-0.180019	0.857137	0.990435
mga-denovo-5-5p	13.555	0.141035	0.987142	0.142872	0.886391	0.990435
mga-nov-49	5.3064	-1.9174	1.39565	-1.37384	0.16949	0.990435
mga-nov-50	4.13418	-0.534812	1.39258	-0.384043	0.700946	0.990435
mga-nov-51	5.30784	0.0772421	1.51173	0.0510953	0.95925	0.990435
mga-denovo-12-3p	3.81299	0.278615	1.40892	0.197751	0.84324	0.990435

## Sheet: small RNA-Seq gene list RvsN
Table S2- miRNAs identified by miRNA-Seq comparing RvsN
miRNA	baseMean	log2FoldChange	lfcSE	stat	pvalue	padj
mga-miR-1994-P1_3p	2968.97	1.56447	0.598056	2.61593	0.00889857	0.394503
mga-miR-1994-P1_3p-1	144.312	1.77722	0.677485	2.62326	0.00870935	0.394503
mga-miR-96-P3_5p	42.2389	-1.96197	0.696901	-2.81528	0.00487351	0.394503
mga-nov-7	7744.46	-0.694675	0.281602	-2.46687	0.01363	0.453197
mga-miR-76_3p	930193	0.0257181	0.362063	0.0710321	0.943372	0.998063
mga-let-7_5p	658994	-0.123696	0.2997	-0.412733	0.679802	0.998063
mga-miR-10-P2_5p	614106	-0.190446	0.25754	-0.739479	0.459616	0.998063
mga-miR-87-o29_3p	349367	-0.0079711	0.246011	-0.0324015	0.974152	0.998063
mga-miR-67_3p	208864	-0.231731	0.344701	-0.672267	0.501414	0.998063
mga-Bantam_3p	210317	0.0644919	0.252385	0.25553	0.798314	0.998063
mga-miR-22-P1_3p	310878	0.00809354	0.266491	0.0303707	0.975771	0.998063
mga-miR-315_5p	142870	0.0460039	0.318456	0.144459	0.885138	0.998063
mga-miR-153-P1_3p	119295	-0.00738411	0.251521	-0.0293578	0.976579	0.998063
mga-miR-67_3p-1	127994	-0.0408407	0.279695	-0.146019	0.883907	0.998063
mga-miR-124_3p	90424.2	0.486042	0.294003	1.65319	0.0982926	0.998063
mga-denovo-8-5p	88561.8	-0.103539	0.237054	-0.436774	0.662275	0.998063
mga-miR-71_5p	95878.9	-0.0603889	0.340803	-0.177196	0.859354	0.998063
mga-nov-2	57076.1	-0.310303	0.433025	-0.716593	0.473625	0.998063
mga-miR-2-P1-v1_3p	66174.1	-0.191798	0.240292	-0.798188	0.424762	0.998063
mga-miR-29-P2_3p	46818.7	-0.0415885	0.28566	-0.145588	0.884247	0.998063
mga-miR-2-o54_3p	31333.8	0.18756	0.318266	0.589317	0.555649	0.998063
mga-miR-1_3p	21084.4	0.332695	0.347314	0.957908	0.338109	0.998063
mga-miR-8_3p	36171.6	-0.00511027	0.262376	-0.019477	0.984461	0.998063
mga-miR-2-P12a_3p	32463.3	-0.0841287	0.246146	-0.341784	0.732514	0.998063
mga-nov-3	21893.9	0.295999	0.271837	1.08888	0.276205	0.998063
mga-miR-22-P2_3p	42880.9	-0.0075296	0.301097	-0.0250072	0.980049	0.998063
mga-miR-96-P1h_5p	29680	-0.0459088	0.349037	-0.13153	0.895356	0.998063
mga-miR-7_5p	19987.9	0.080744	0.353292	0.228547	0.819221	0.998063
mga-miR-2-o24_3p	19787.7	-0.205393	0.242251	-0.84785	0.396522	0.998063
mga-miR-67-v1_3p	16055.1	-0.165589	0.323857	-0.511303	0.609139	0.998063
mga-miR-317-P8_3p	19779.9	0.0281355	0.234679	0.119889	0.904571	0.998063
mga-miR-96-P1i_5p	12721.9	0.0318687	0.287775	0.110742	0.911821	0.998063
mga-miR-1984-P1_5p	15853.2	0.0275854	0.332198	0.0830391	0.93382	0.998063
mga-miR-34_5p	12638.1	0.195259	0.287602	0.678919	0.497189	0.998063
mga-denovo-11-5p	10854.3	-0.0426477	0.318105	-0.134068	0.893349	0.998063
mga-miR-96-P2_5p	10067.4	0.102345	0.324698	0.315201	0.752609	0.998063
mga-miR-2722_5p	6909.63	0.0900415	0.252048	0.357239	0.720913	0.998063
mga-miR-190_5p	7736.62	0.121199	0.347452	0.348821	0.727224	0.998063
mga-miR-9-o18_3p	8379.71	-0.0330638	0.288304	-0.114684	0.908696	0.998063
mga-miR-1984-P2_5p	7153.14	-0.0760249	0.243911	-0.311691	0.755275	0.998063
mga-nov-5	9545.79	-0.155816	0.261515	-0.59582	0.551295	0.998063
mga-miR-67-P5_3p	5466.52	-0.0657879	0.321923	-0.204359	0.838073	0.998063
mga-miR-193-P1m_3p	6448.9	-0.408436	0.281421	-1.45133	0.146688	0.998063
mga-nov-6	4699.87	0.0963239	0.261092	0.368927	0.712182	0.998063
mga-miR-750_3p	3932.05	0.0193074	0.427354	0.045179	0.963965	0.998063
mga-miR-219_3p	5125.3	0.277798	0.230107	1.20725	0.227334	0.998063
mga-miR-1994-P2_3p	1540.13	1.72836	0.880803	1.96225	0.0497329	0.998063
mga-miR-12_5p	2882.31	0.43972	0.284002	1.5483	0.121551	0.998063
mga-miR-29-P1b-v1_3p	2233.55	0.283288	0.289631	0.978099	0.328025	0.998063
mga-miR-9-P10a_5p	4364.79	0.28377	0.291869	0.972252	0.330925	0.998063
mga-miR-133_3p	1242.32	0.626081	0.565635	1.10686	0.268353	0.998063
mga-Novel-1_5p	3138.35	0.0755535	0.275341	0.2744	0.783777	0.998063
mga-miR-279-P2_3p	2430.01	0.240959	0.466613	0.5164	0.605575	0.998063
mga-miR-29-P1b-v1_3p-1	2445.95	0.128495	0.248672	0.516724	0.605349	0.998063
mga-miR-10-P1c-v1_5p	3980.09	0.0214378	0.309244	0.0693232	0.944732	0.998063
mga-nov-8	4673.67	-0.39309	0.325874	-1.20626	0.227716	0.998063
mga-miR-2722_3p	4549.04	-0.217526	0.373282	-0.58274	0.560069	0.998063
mga-denovo-2-5p	1621.57	0.361631	0.325692	1.11035	0.26685	0.998063
mga-miR-10-P6_5p	2151.83	0.29206	0.269067	1.08545	0.277722	0.998063
mga-nov-10	3993.37	-0.505178	0.48016	-1.0521	0.292752	0.998063
mga-miR-153_5p	2056.09	-0.0227546	0.280125	-0.0812301	0.935259	0.998063
mga-miR-137-P11_3p	1932.88	0.199636	0.298963	0.66776	0.504287	0.998063
mga-denovo-13-5p	1135.84	0.292454	0.305326	0.957843	0.338142	0.998063
mga-miR-1992_3p	944.255	0.441419	0.298986	1.47639	0.13984	0.998063
mga-nov-12	1031.45	-0.137874	0.415559	-0.33178	0.740055	0.998063
mga-miR-92-P3_3p	1123.89	-0.114648	0.282986	-0.405135	0.685379	0.998063
mga-miR-1175_3p	796.73	-0.192915	0.485174	-0.39762	0.69091	0.998063
mga-miR-216-P1_5p	643.702	0.0601258	0.438711	0.137051	0.890991	0.998063
mga-denovo-3-3p	926.09	0.535846	0.300062	1.78578	0.0741345	0.998063
mga-miR-216-P2d_3p	1228.89	0.032411	0.283883	0.11417	0.909103	0.998063
mga-nov-14	1297.98	-0.883252	0.435431	-2.02845	0.0425141	0.998063
mga-miR-2-P1-v1_3p-1	562.621	0.278585	0.330123	0.843882	0.398736	0.998063
mga-miR-1990-P2_3p	1290.12	0.123434	0.304296	0.405639	0.685008	0.998063
mga-miR-2-P4-v1_3p	891.721	-0.033241	0.264333	-0.125754	0.899926	0.998063
mga-nov-15	1252.38	-0.0955195	0.388	-0.246184	0.80554	0.998063
mga-denovo-14-5p	595.613	0.138108	0.330266	0.418172	0.675822	0.998063
mga-miR-375_3p	419.343	0.501617	0.403434	1.24337	0.213732	0.998063
mga-miR-2-o36_3p	599.13	-0.0613636	0.285039	-0.215282	0.829548	0.998063
mga-miR-92-o140_3p	576.435	-0.117677	0.337692	-0.348474	0.727484	0.998063
mga-miR-92-P4_3p	936.836	-0.0342675	0.418598	-0.0818627	0.934756	0.998063
mga-miR-219_5p	542.222	0.0442342	0.416167	0.10629	0.915353	0.998063
mga-miR-1989_5p	480.615	-0.017016	0.434913	-0.0391252	0.968791	0.998063
mga-nov-17	379.562	0.309506	0.313681	0.986692	0.323794	0.998063
mga-miR-96-P1_5p	416.807	0.105635	0.339308	0.311326	0.755553	0.998063
mga-miR-10-P6_5p-1	329.302	0.317865	0.290965	1.09245	0.274636	0.998063
mga-nov-18	194.152	-0.357625	0.379454	-0.942473	0.345951	0.998063
mga-miR-2001_5p	384.337	-0.11487	0.471188	-0.243788	0.807395	0.998063
mga-miR-216-P2c_5p	251.689	0.264914	0.364946	0.725898	0.467901	0.998063
mga-miR-1993_3p	139.191	0.429107	0.645752	0.664508	0.506365	0.998063
mga-miR-33-P1_5p	232.42	0.613844	0.365479	1.67956	0.0930424	0.998063
mga-nov-19	141.322	-0.536111	0.479273	-1.11859	0.263314	0.998063
mga-nov-20	227.389	-0.472373	0.41022	-1.15151	0.249523	0.998063
mga-miR-277_3p	106.413	0.520403	0.435086	1.19609	0.231661	0.998063
mga-nov-21	142.697	0.298892	0.478784	0.624274	0.532448	0.998063
mga-miR-29-P2_3p-1	77.5759	-0.112508	0.411858	-0.273171	0.784721	0.998063
mga-nov-22	99.6643	-0.421972	0.446407	-0.945263	0.344525	0.998063
mga-miR-10-P5_5p	125.767	-0.664221	0.442288	-1.50178	0.133153	0.998063
mga-denovo-4-5p	158.419	-0.530088	1.13676	-0.466314	0.640991	0.998063
mga-nov-24	72.6779	0.00584513	0.493973	0.0118329	0.990559	0.998063
mga-nov-25	29.1893	0.464074	1.09376	0.424292	0.671353	0.998063
mga-nov-26	23.175	0.0698551	0.709747	0.0984226	0.921597	0.998063
mga-nov-27	25.6486	-0.434506	0.721112	-0.602551	0.546808	0.998063
mga-nov-28	28.2888	0.560119	0.602543	0.929592	0.352582	0.998063
mga-nov-29	23.3185	-0.163407	0.723604	-0.225823	0.821339	0.998063
mga-nov-30	29.6864	-0.931637	0.675301	-1.37959	0.167714	0.998063
mga-nov-31	23.6222	-0.861874	0.652659	-1.32056	0.186649	0.998063
mga-nov-32	24.0903	-0.130028	0.671594	-0.193611	0.84648	0.998063
mga-nov-33	19.5017	0.0311848	0.729066	0.0427737	0.965882	0.998063
mga-nov-34	17.1484	0.532737	1.07149	0.497192	0.619054	0.998063
mga-miR-281_3p	54.1646	-0.749851	0.735296	-1.01979	0.307826	0.998063
mga-denovo-7-3p	12.2175	-0.285246	0.868082	-0.328593	0.742463	0.998063
mga-denovo-1-5p	23.5691	-0.380778	0.938548	-0.405709	0.684956	0.998063
mga-nov-37	18.3245	-0.0334441	0.686373	-0.0487258	0.961138	0.998063
mga-miR-242_5p	8.37154	-0.915809	1.26834	-0.722055	0.470261	0.998063
mga-miR-29-P1b-v1_3p-2	7.29325	0.355538	0.995092	0.357291	0.720874	0.998063
mga-nov-38	15.7118	0.247419	0.845288	0.292704	0.769748	0.998063
mga-denovo-10-5p	22.0079	-0.16635	1.1778	-0.141238	0.887682	0.998063
mga-miR-1986-P1_3p	5.62017	1.03595	1.30298	0.795062	0.426578	0.998063
mga-denovo-9-5p	9.4812	0.0344462	0.923282	0.0373085	0.970239	0.998063
mga-nov-41	11.0056	-0.33219	0.840684	-0.395143	0.692738	0.998063
mga-nov-42	4.03494	1.36861	1.90281	0.719258	0.471982	0.998063
mga-miR-96-P1i_5p-1	5.55408	-0.28498	1.13264	-0.251608	0.801344	0.998063
mga-miR-29-P2_3p-2	7.47655	0.385281	1.03395	0.372629	0.709425	0.998063
mga-miR-193-P1_3p	9.86206	-0.293521	0.936681	-0.313363	0.754005	0.998063
mga-nov-44	6.62701	-0.344669	1.06778	-0.322791	0.746854	0.998063
mga-miR-1-P1_3p	5.00244	-0.604324	1.2727	-0.474837	0.634903	0.998063
mga-denovo-6-5p	8.77867	-0.217583	1.05111	-0.207002	0.836008	0.998063
mga-denovo-6-3p	6.2625	-0.0467315	1.27863	-0.0365481	0.970845	0.998063
mga-denovo-5-5p	13.555	-0.463213	0.998282	-0.46401	0.64264	0.998063
mga-nov-49	5.3064	-1.44412	1.3634	-1.05921	0.289504	0.998063
mga-nov-51	5.30784	-1.69327	1.60577	-1.05449	0.291658	0.998063
mga-denovo-12-3p	3.81299	-0.910601	1.47346	-0.618004	0.536573	0.998063
mga-nov-50	4.13418	0.000392244	1.36306	0.000287766	0.99977	0.99977
