# Supplementary material for: Effect of hypoxia and reoxygenation on the nervous system of the Mediterranean mussel Mytilus galloprovincialis
Source: Research Square preprint supplement (doi:10.21203/rs.3.rs-8775360/v1), 2026-02-16
Supplement: Supplementary file 4 [file f583093b515497fcb0a1aa05.xlsx]

## Sheet: Prost! output
Dataset 3. Prost! output of mature miRNAs identified in M. galloprovincialis
					bona fide novel miRNA
Loc_idx	BinStarter	Locations	CIGARs_5pto3p	Designations	mga_miRNA	other_species_miRNA	N1	N2	N3	R1	R2	R3	H1	H2	H3	N1_norm	N2_norm	N3_norm	R1_norm	R2_norm	R3_norm	H1_norm	H2_norm	H3_norm
gl2323	TTCGTTGTCGTCGAAACCTGCC	UYJE01003459.1:79955-79934	22=	1	mga-miR-76_3p	Agr-Mir-76_3p,Cte-Mir-76_3p,Eba-Mir-76_3p,Esc-Mir-76_3p,Hru-Mir-76_3p,Lan-Mir-76-P1_3p,Lan-Mir-76-P2_3p,Lgi-Mir-76_3p,Lpo-Mir-76-P5_3p,Lpo-Mir-76-P6_3p,Lpo-Mir-76-P7_3p,Lpo-Mir-76-P8_3p,Mgi-Mir-76_3p,Mom-Mir-76_3p,Obi-Mir-76_3p,Ofu-Mir-76_3p,Ovu-Mir-76_3p,Pdu-Mir-76_3p,Pve-Mir-76_3p,Rph-Mir-76_3p,Snu-Mir-76_3p,War-Mir-76_3p,cte-miR-981,esc-miR-76_3p,lgi-miR-981,obi-miR-76-3p,ovu-miR-76-3p	1235128	935334	827036	834063	1251947	599385	1466337	1294786	371602	158934	173469	175910	137779	220275	160206	214198	197744	103474
gl1376	AACCCGTAGATCCGAACTTG	UYJE01010499.1:156005-156024	20=	1	mga-miR-10-P2_5p	Aae-Mir-10-P2_5p,Aca-Mir-10-P2b_5p,Aca-Mir-10-P2d_5p,Adi-Mir-10_5p,Aga-Mir-10-P2_5p,Agr-Mir-10-P2_5p,Ami-Mir-10-P2b_5p,Ami-Mir-10-P2d_5p,Asp-Mir-10_5p,Asu-Mir-10-P2o3_5p,Asu-Mir-10-P2o5_5p,Bfl-Mir-10-P2-v1_5p,Bge-Mir-10-P2_5p,Bla-Mir-10-P2-v1_5p,Bta-Mir-10-P2d_5p,Cja-Mir-10-P2d_5p,Cli-Mir-10-P2d_5p,Cmi-Mir-10-P2d_5p,Cpi-Mir-10-P2b_5p,Cpi-Mir-10-P2d_5p,Cpo-Mir-10-P2d_5p,Csc-Mir-10-P2r1_5p,Csc-Mir-…	1086801	638743	532356	793769	702598	330655	883075	769985	264504	139847	118463	113232	131123	123619	88378.6	128997	117595	73651.9
gl2537	TGAGGTAGTAGGTTGTATAGT	UYJE01010499.1:157065-157085	21=	1	mga-let-7_5p	Aae-Let-7_5p,Aca-Let-7-P1b_5p,Aca-Let-7-P1c_5p,Aca-Let-7-P1d_5p,Aca-Let-7-P2a1_5p,Aca-Let-7-P2a2_5p,Aca-Let-7-P2a3_5p,Aca-Let-7-P2b1_5p,Aca-Let-7-P2b4_5p,Aga-Let-7_5p,Agr-Let-7_5p,Ami-Let-7-P1b_5p,Ami-Let-7-P1c_5p,Ami-Let-7-P1d_5p,Ami-Let-7-P2a1_5p,Ami-Let-7-P2a2_5p,Ami-Let-7-P2a3_5p,Ami-Let-7-P2b1_5p,Ami-Let-7-P2b4_5p,Asu-Let-7-P5_5p,Bfl-Let-7-P3_5p,Bfl-Let-7-P4_5p,Bge-Let-7_5p,Bla-Let-7-P3_5p,B…	912045	785472	582075	712857	764450	408404	865273	899612	307605	117360	145675	123807	117757	134502	109160	126396	137392	85653.5
gl697	GTGAGCAAAGTTTCAGGTGTA	UYJE01005634.1:22432-22452	21=	1	mga-miR-87-o29_3p	Agr-Mir-87-o29_3p,Asu-Mir-87-o4_3p,Ava-Mir-87-o34_3p,Ava-Mir-87-o35_3p,Bge-Mir-87-P1_3p,Bge-Mir-87-P2a_3p,Bge-Mir-87-P2b_3p,Cbr-Mir-87-o1_3p,Cel-Mir-87-o1_3p,Csc-Mir-87-P2l_3p,Cte-Mir-87-P1_3p,Cte-Mir-87-P2_3p,Dgr-Mir-87-P1_3p,Dlo-Mir-87-P1_3p,Dlo-Mir-87-P2_3p,Dma-Mir-87-o5a_3p,Dma-Mir-87-o5b_3p,Dpu-Mir-87-o5a_3p,Dpu-Mir-87-o5b_3p,Eba-Mir-87-o29_3p,Efe-Mir-87-o12_3p,Egr-Mir-87-o28_3p,Esc-Mir-87-o…	519437	321039	333279	478219	355386	215016	461339	459937	188237	66840	59540.6	70888.4	78997.2	62528.8	57470.2	67391	70243.2	52415.1
gl1086	AGCTGCCTGATGAAGAGCTGTCC	UYJE01006077.1:31890-31868	23=	1	mga-miR-22-P1_3p	Agr-Mir-22-P1_3p,Eba-Mir-22-P1_3p,Esc-Mir-22-P1_3p,Hru-Mir-22-P1_3p,Lgi-Mir-22-P1_3p,Lhy-Mir-22-P1_3p,Mgi-Mir-22-P1_3p,Mom-Mir-22-P1_3p,Npo-Mir-22-P1_3p,Obi-Mir-22-P1_3p,Ovu-Mir-22-P1_3p,Pve-Mir-22-P1_3p,Rph-Mir-22-P1_3p,War-Mir-22-P1_3p,esc-miR-22-P1_3p,lgi-miR-745a,npo-miR-22-P1-3p,obi-miR-22-P1-3p,ovu-miR-22-P1-3p	508077	307130	233026	400316	371865	185816	481660	402697	135946	65378.2	56961	49564.6	66128.4	65428.2	49665.5	70359.4	61501.3	37854.5
gl1061	TCACAACCTCCTTGAATGAGTG	UYJE01005908.1:31305-31326	22=	1	mga-miR-67_3p	Dpu-Mir-67_3p,Lpo-Mir-67-P10_3p,Lpo-Mir-67-P11_3p,Lpo-Mir-67-P7_3p,Lpo-Mir-67-P8_3p,Lpo-Mir-67-P9_3p,Mgi-Mir-67-P5_3p,Tur-Mir-67_3p,tur-miR-307-3p	400577	287261	117135	289391	183456	136092	183299	217920	163762	51545.4	53276.1	24914.6	47804.6	32278.4	36375.1	26775.8	33281.5	45600
gl2483	TGAGATCATTGTGAAAACTGA	UYJE01010326.1:327659-327679	21=	1	mga-Bantam_3p	Agr-Bantam_3p,Bge-Bantam_3p,Bko-Bantam_3p,Bpl-Bantam_3p,Csc-Bantam-P16_3p,Csc-Bantam-P17_3p,Cte-Bantam_3p,Dgr-Bantam_3p,Dlo-Bantam_3p,Dma-Bantam_3p,Dpu-Bantam_3p,Eba-Bantam_3p,Efe-Bantam-P6_3p,Esc-Bantam_3p,Gsp-Bantam_3p,Hru-Bantam_3p,Isc-Bantam-P9a_3p,Isc-Bantam-P9b_3p,Lan-Bantam_3p,Lhy-Bantam_3p,Llo-Bantam_3p,Lpo-Bantam-P10_3p,Lpo-Bantam-P11_3p,Lpo-Bantam-P12_3p,Lpo-Bantam-P13_3p,Mgi-Bantam_3p,…	360956	204689	152395	304703	240742	110030	223324	283664	144425	46447	37962.1	32414.4	50334	42357.6	29409.2	32622.5	43322.2	40215.5
gl2031	TCACAACCTGCATGAATGAGGGC	UYJE01001606.1:320407-320429	23=	1	mga-miR-67_3p	Cte-Mir-67_3p,Dgr-Mir-67_3p,Hru-Mir-67_3p,Lgi-Mir-67_3p,Mgi-Mir-67-P6_3p,Pdu-Mir-67_3p,cte-miR-67,lgi-miR-67	219659	108117	122595	140018	109307	103841	182420	142073	72744	28265.2	20051.6	26075.9	23129.6	19232.1	27755	26647.4	21697.9	20255.8
gl68	TTTTGATTGTTGCTCAGAAAGCC	UYJE01000804.1:267576-267598	23=	1	mga-miR-315_5p	Aae-Mir-315_5p,Aga-Mir-315_5p,Agr-Mir-315_5p,Ava-Mir-315-P7_5p,Ava-Mir-315-P8_5p,Bge-Mir-315_5p,Bko-Mir-315_5p,Bpl-Mir-315_5p,Csc-Mir-315_5p,Cte-Mir-315_5p,Dan-Mir-315_5p,Dgr-Mir-315-P1_5p,Dgr-Mir-315-P2_5p,Dlo-Mir-315_5p,Dma-Mir-315_5p,Dme-Mir-315_5p,Dmo-Mir-315_5p,Dpu-Mir-315_5p,Dsi-Mir-315_5p,Dya-Mir-315_5p,Eba-Mir-315_5p,Gpa-Mir-315_5p,Hru-Mir-315_5p,Isc-Mir-315_5p,Lan-Mir-315_5p,Lgi-Mir-315_…	167953	146143	159514	138678	157310	77243	182487	210166	86318	21611.8	27104	33928.6	22908.3	27678.1	20645.8	26657.1	32097.3	24035.5
gl2586	TTGCATAGTCACAAAAGTGATC	UYJE01007505.1:149058-149037	22=	1	mga-miR-153-P1_3p	Aca-Mir-153-P1_3p,Aca-Mir-153-P2_3p,Agr-Mir-153_3p,Ami-Mir-153-P1_3p,Ami-Mir-153-P2_3p,Asu-Mir-153_3p,Bta-Mir-153-P1_3p,Bta-Mir-153-P2_3p,Cfa-Mir-153-P1_3p,Cfa-Mir-153-P2_3p,Cja-Mir-153-P1_3p,Cja-Mir-153-P2_3p,Cli-Mir-153-P1_3p,Cli-Mir-153-P2_3p,Cmi-Mir-153-P1_3p,Cmi-Mir-153-P2_3p,Cmi-Mir-153-P4_3p,Cpi-Mir-153-P1_3p,Cpi-Mir-153-P2_3p,Cpo-Mir-153-P1_3p,Cte-Mir-153_3p,Dgr-Mir-153_3p,Dma-Mir-153_3p,…	160007	113135	109485	154048	117530	92750	109502	149406	85633	20589.4	20982.3	23287.5	25447.3	20678.9	24790.5	15995.7	22817.8	23844.7
gl439	TCGCTGAGACAAAGAATTCTAC	UYJE01005027.1:13975-13996	22=	1	mga-denovo-8-5p		158611	86212	80762	123384	81426	48651	110045	124820	47078	20409.7	15989.1	17178.1	20381.9	14326.6	13003.6	16075	19062.9	13109
gl2508	TAAGGCACGCGGTGAATGCCA	UYJE01005499.1:21919-21939	21=	1	mga-miR-124_3p	Aae-Mir-124_3p,Aca-Mir-124-P1-v1_3p,Aca-Mir-124-P2-v1_3p,Aca-Mir-124-P3-v1_3p,Aca-Mir-124-P4-v1_3p,Aga-Mir-124_3p,Agr-Mir-124_3p,Ami-Mir-124-P1-v1_3p,Ami-Mir-124-P2-v1_3p,Ami-Mir-124-P3-v1_3p,Ami-Mir-124-P4-v1_3p,Asu-Mir-124_3p,Bta-Mir-124-P1-v1_3p,Bta-Mir-124-P2-v1_3p,Bta-Mir-124-P3-v1_3p,Cbr-Mir-124-P9_3p,Cel-Mir-124_3p,Cfa-Mir-124-P1-v1_3p,Cfa-Mir-124-P2-v1_3p,Cfa-Mir-124-P3-v1_3p,Cin-Mir-124-…	133070	61096	61589	153106	69547	67855	156410	103892	60309	17123.2	11331	13100	25291.6	12236.5	18136.5	22847.9	15866.8	16793.2
gl128	TGAAAGACATGGGTAGTGAGA	UYJE01008245.1:143275-143295	21=	1	mga-miR-71_5p	Aae-Mir-71_5p,Agr-Mir-71_5p,Asu-Mir-71_5p,Ava-Mir-71-P20_5p,Ava-Mir-71-P21_5p,Bfl-Mir-71_5p,Bge-Mir-71_5p,Bla-Mir-71_5p,Cbr-Mir-71_5p,Cel-Mir-71_5p,Cte-Mir-71_5p,Dgr-Mir-71_5p,Dlo-Mir-71_5p,Dma-Mir-71_5p,Dpu-Mir-71_5p,Efe-Mir-71-P1_5p,Efe-Mir-71-P2_5p,Esc-Mir-71_5p,Hru-Mir-71_5p,Isc-Mir-71_5p,Lan-Mir-71-P4_5p,Lan-Mir-71-P5_5p,Lhy-Mir-71_5p,Llo-Mir-71_5p,Lpo-Mir-71-P12_5p,Lpo-Mir-71-P9_5p,Mgi-Mir-…	131590	112939	81871	84457	129631	54638	131639	134872	45237	16932.7	20945.9	17414	13951.5	22808.1	14603.8	19229.4	20598.1	12596.4
gl145	TATCACAGCCAGCTTTGATGAGC	UYJE01004174.1:105337-105359;UYJE01008245.1:143745-143767;UYJE01008245.1:144372-144394;UYJE01008245.1:144571-144593;UYJE01008245.1:144877-144899	23=;23=;23=;23=;23=	1	mga-miR-2-P1-v1_3p	Aae-Mir-2-P1-v1_3p,Aae-Mir-2-P4-v1_3p,Aga-Mir-2-P1-v1_3p,Aga-Mir-2-P4-v1_3p,Agr-Mir-2-o85_3p,Agr-Mir-2-o86a-v1_3p,Agr-Mir-2-o87-v1_3p,Bge-Mir-2-P1-v1_3p,Bge-Mir-2-P3-v1_3p,Bge-Mir-2-P4-v1_3p,Csc-Mir-2-P3n_3p,Csc-Mir-2-P3o_3p,Csc-Mir-2-P4n_3p,Csc-Mir-2-P4o_3p,Dan-Mir-2-P4a-v1_3p,Dan-Mir-2-P4b-v1_3p,Dgr-Mir-2-o36_3p,Dgr-Mir-2-o37_3p,Dgr-Mir-2-o38_3p,Dlo-Mir-2-P1-v1_3p,Dlo-Mir-2-P3-v1_3p,Dlo-Mir-67-…	120994	68934	55415	79318	67471	45152	84194	72226	37251	15569.2	12784.6	11786.8	13102.6	11871.3	12068.4	12298.8	11030.6	10372.6
gl1220	TCACAACCTCCTTGAATGAGAT	UYJE01005908.1:32626-32647	22=	1	mga-miR-67-P5-3p	Mgi-Mir-67-P5-3p	106135	94139	25805	113206	45982	28427	40233	55507	44512	13657.2	17459.2	5488.72	18700.5	8090.35	7598.07	5877.11	8477.22	12394.5
gl1154	TAGCACCATTTGAAATCAGTT	UYJE01006404.1:121320-121340	21=	1	mga-miR-29-P2_3p	Agr-Mir-29-P2_3p,Cte-Mir-29-P2_3p,Eba-Mir-29-P2_3p,Ebu-Mir-29-P2e_3p,Esc-Mir-29-P2_3p,Hru-Mir-29-P2_3p,Lan-Mir-29-P2i_3p,Lan-Mir-29-P2j_3p,Lgi-Mir-29-P2_3p,Lhy-Mir-29-P2_3p,Llo-Mir-29-P2_3p,Mgi-Mir-29-P2_3p,Mom-Mir-29-P2_3p,Npo-Mir-29-P2_3p,Obi-Mir-29-P2_3p,Ofu-Mir-29-P2_3p,Ovu-Mir-29-P2_3p,Pdu-Mir-29-P2_3p,Pma-Mir-29-P1o1_3p,Pve-Mir-29-P2_3p,Snu-Mir-29-P2q_3p,War-Mir-29-P2_3p,cte-miR-29a,esc-miR…	81724	38301	46672	62887	31373	35096	66923	41741	33869	10516.1	7103.39	9927.13	10388.3	5519.96	9380.58	9775.91	6374.83	9430.92
gl1521	GAGCTGCCAAATGAAGGGC	UYJE01006077.1:30365-30347	19=	1	mga-miR-22-P2_3p	Agr-Mir-22-P2_3p,Esc-Mir-22-P2_3p,Hru-Mir-22-P2_3p,Lgi-Mir-22-P2_3p,Lhy-Mir-22-P2_3p,Mgi-Mir-22-P2_3p,Mom-Mir-22-P2_3p,Npo-Mir-22-P2_3p,Ovu-Mir-22-P2_3p,Pve-Mir-22-P2_3p,Rph-Mir-22-P2_3p,esc-miR-22-P2_3p,npo-miR-22-P2-3p,ovu-miR-22-P2-3p	62549	43595	33755	55798	50246	27685	65185	60182	16065	8048.67	8085.22	7179.69	9217.29	8840.59	7399.74	9522.03	9191.21	4473.34
gl593	TATCACAGCCTGCTTGGATCAG	UYJE01008245.1:143964-143985	22=	1	mga-miR-2-P12a_3p	Agr-Mir-2-P12a_3p,Agr-Mir-2-P12b_3p,Agr-Mir-2-P12e_3p,Dgr-Mir-2-P12_3p,Efe-Mir-2-P12g_3p,Esc-Mir-2-P12_3p,Hru-Mir-2-P12_3p,Lgi-Mir-2-P12a_3p,Lgi-Mir-2-P12b_3p,Lgi-Mir-2-P12c_3p,Lhy-Mir-2-P12_3p,Llo-Mir-2-P12_3p,Mgi-Mir-2-P12_3p,Mom-Mir-2-P12g_3p,Mom-Mir-2-P12i_3p,Mom-Mir-2-P12j_3p,Mom-Mir-2-P12k_3p,Npo-Mir-2-P12_3p,Obi-Mir-2-P12_3p,Ovu-Mir-2-P12_3p,Pau-Mir-2-P12_3p,Pve-Mir-2-P12_3p,Rph-Mir-2-P12_…	57351	32873	26514	42264	30499	21537	46393	32566	19895	7379.8	6096.7	5639.53	6981.61	5366.18	5756.48	6776.95	4973.59	5539.82
gl948	TAATACTGTCAGGTAAAGATGTC	UYJE01001235.1:130451-130429	23=	1	mga-miR-8_3p	Aae-Mir-8_3p,Aga-Mir-8_3p,Agr-Mir-8_3p,Ava-Mir-8-P16_3p,Ava-Mir-8-P17_3p,Bge-Mir-8_3p,Csc-Mir-8_3p,Cte-Mir-8_3p,Dan-Mir-8_3p,Dgr-Mir-8_3p,Dlo-Mir-8_3p,Dma-Mir-8_3p,Dme-Mir-8_3p,Dmo-Mir-8_3p,Dpu-Mir-8_3p,Dsi-Mir-8_3p,Dya-Mir-8_3p,Eba-Mir-8_3p,Efe-Mir-8-P4_3p,Efe-Mir-8-P5_3p,Esc-Mir-8_3p,Gpa-Mir-8_3p,Hme-Mir-8_3p,Hru-Mir-8_3p,Isc-Mir-8_3p,Lan-Mir-8_3p,Lgi-Mir-8_3p,Lhy-Mir-8_3p,Llo-Mir-8_3p,Lpo-Mir-…	48644	38317	34806	45372	38743	19544	51224	44220	21357	6259.4	7106.35	7403.23	7495.02	6816.68	5223.79	7482.65	6753.43	5946.92
gl1448	CTTGGCACTGGCGGAATAATCAC	UYJE01006110.1:48283-48261	23=	1	mga-miR-96-P1h_5p	Agr-Mir-96-P1h_5p,Dgr-Mir-96-P1n_5p,Eba-Mir-96-P1_5p,Hru-Mir-96-P1h_5p,Lgi-Mir-96-P1h_5p,Lhy-Mir-96-P1_5p,Mgi-Mir-96-P1h_5p,Mom-Mir-96-P1h_5p,Npo-Mir-96-P1h_5p,Ofu-Mir-96-P1q_5p,Pau-Mir-96-P1_5p,Pdu-Mir-96-P1v_5p,Pve-Mir-96-P1h_5p,Rph-Mir-96-P1h_5p,Snu-Mir-96-P1_5p,War-Mir-96-P1_5p,lgi-miR-96a,npo-miR-96-P1h-5p	39240	25037	36528	28761	33684	18127	42154	41309	13483	5049.32	4643.42	7769.5	4751.04	5926.57	4845.05	6157.73	6308.86	3754.38
gl394	TATCACAGCCAGCTTTGATGACA	UYJE01008245.1:145212-145234	23=	1	mga-miR-2-o54_3p	Hru-Mir-2-o54_3p,Mgi-Mir-2-o61_3p,Rph-Mir-2-o66_3p	36671	35953	18810	48088	34370	22023	29156	37254	25897	4718.74	6667.92	4000.89	7943.68	6047.27	5886.38	4259.02	5689.56	7211.09
gl952	TGGAATGTAAAGAAGTATGTA	UYJE01006951.1:57978-57998	21=	1	mga-miR-1_3p	Aae-Mir-1_3p,Aca-Mir-1-P1_3p,Aca-Mir-1-P3_3p,Aga-Mir-1_3p,Agr-Mir-1_3p,Ami-Mir-1-P1_3p,Ami-Mir-1-P3_3p,Asu-Mir-1_3p,Bfl-Mir-1_3p,Bge-Mir-1_3p,Bla-Mir-1_3p,Bta-Mir-1-P1_3p,Bta-Mir-1-P3_3p,Cbr-Mir-1_3p,Cel-Mir-1_3p,Cfa-Mir-1-P1_3p,Cfa-Mir-1-P3_3p,Cin-Mir-1_3p,Cja-Mir-1-P1_3p,Cja-Mir-1-P3_3p,Cli-Mir-1-P1_3p,Cli-Mir-1-P3_3p,Cmi-Mir-1-P1_3p,Cmi-Mir-1-P3_3p,Cmi-Mir-1-P4_3p,Cpi-Mir-1-P1_3p,Cpi-Mir-1-P3_…	36441	20641	14109	28307	16002	8847	20546	26995	25088	4689.15	3828.12	3000.98	4676.05	2815.49	2364.66	3001.3	4122.77	6985.82
gl434	TATCACAGCCTGCTTTGATGAGC	UYJE01008245.1:144745-144767	23=	1	mga-miR-2-o24_3p	Efe-Mir-2-o24_3p,Lan-Mir-2-o100_3p,Lan-Mir-2-o101a_3p,Lan-Mir-2-o101b_3p,Lan-Mir-2-o102_3p,Lan-Mir-2-o106a_3p,Lan-Mir-2-o106b_3p,Lan-Mir-2-o107_3p,Lhy-Mir-2-o81_3p,Lhy-Mir-2-o82_3p,Lhy-Mir-2-o84_3p,Llo-Mir-2-o118_3p,Llo-Mir-2-o119_3p,Llo-Mir-2-o120_3p,Llo-Mir-2-o121_3p,Mom-Mir-2-o89_3p,Npo-Mir-2-o49_3p,Obi-Mir-2-o49_3p,Ofu-Mir-2-o158_3p,Ovu-Mir-2-o49_3p,Pau-Mir-2-o111_3p,Pau-Mir-2-o112_3p,Pau-Mir…	36091	20173	16279	25257	19740	14373	24918	20074	11282	4644.11	3741.33	3462.54	4172.21	3473.18	3841.66	3639.95	3065.77	3141.5
gl309	CACAACCTGCTTGAATGAGG	UYJE01005908.1:31158-31177;UYJE01005908.1:32360-32379	20=;20=	1	mga-miR-67-v1_3p	Agr-Mir-67-v1_3p,Eba-Mir-67-v1_3p,Mgi-Mir-67-P4_3p,Mom-Mir-67-v1_3p,Npo-Mir-67_3p,Obi-Mir-67_3p,Ovu-Mir-67_3p,Pve-Mir-67-v1_3p,Rph-Mir-67-v1_3p,War-Mir-67-v1_3p,npo-miR-67-3p,obi-miR-67-3p,ovu-miR-67-3p	32753	19856	9206	29814	13644	8356	15055	18464	10971	4214.58	3682.54	1958.12	4924.99	2400.61	2233.42	2199.19	2819.89	3054.91
gl2529	TGAACACAGCTGGTGGTATCTTT	UYJE01010133.1:57622-57644	23=	1	mga-miR-317-P8_3p	Aae-Mir-317-P8_3p,Aae-Mir-317-P9_3p,Agr-Mir-317_3p,Bge-Mir-317_3p,Cte-Mir-317_3p,Dan-Mir-317_3p,Dgr-Mir-317-P3_3p,Dgr-Mir-317-P4_3p,Dlo-Mir-317_3p,Dma-Mir-317_3p,Dme-Mir-317_3p,Dmo-Mir-317_3p,Dpu-Mir-317_3p,Dsi-Mir-317_3p,Dya-Mir-317_3p,Eba-Mir-317_3p,Esc-Mir-317_3p,Hme-Mir-317_3p,Hru-Mir-317_3p,Isc-Mir-317_3p,Lan-Mir-317-P10_3p,Lan-Mir-317-P11_3p,Lgi-Mir-317_3p,Llo-Mir-317_3p,Lpo-Mir-317-P12_3p,…	30899	19194	16687	27831	19019	12341	26476	26894	10689	3976.02	3559.76	3549.32	4597.41	3346.32	3298.54	3867.53	4107.35	2976.38
gl809	TGCCCTATCCGTCAGTCGCTGC	UYJE01000044.1:184254-184275	22=	1	mga-miR-1984-P1_5p	Mgi-Mir-1984-P1_5p,Pve-Mir-1984-P1_5p,Rph-Mir-1984-P1_5p	28303	12788	15180	20021	13709	9707	31065	16600	7342	3641.97	2371.69	3228.78	3307.28	2412.04	2594.52	4537.88	2535.21	2044.4
gl1482	TGGAAGACTAGTGATTTTGTTGT	UYJE01001352.1:219206-219184	23=	1	mga-miR-7_5p	Aae-Mir-7_5p,Aca-Mir-7-P1_5p,Aca-Mir-7-P2_5p,Aca-Mir-7-P4_5p,Aga-Mir-7_5p,Agr-Mir-7_5p,Ami-Mir-7-P1_5p,Ami-Mir-7-P2_5p,Ami-Mir-7-P4_5p,Bfl-Mir-7_5p,Bge-Mir-7_5p,Bla-Mir-7_5p,Bta-Mir-7-P1_5p,Bta-Mir-7-P2_5p,Bta-Mir-7-P4_5p,Cfa-Mir-7-P1_5p,Cfa-Mir-7-P2_5p,Cfa-Mir-7-P4_5p,Cin-Mir-7_5p,Cja-Mir-7-P2_5p,Cja-Mir-7-P4_5p,Cli-Mir-7-P1_5p,Cli-Mir-7-P2_5p,Cli-Mir-7-P4_5p,Cmi-Mir-7-P1_5p,Cmi-Mir-7-P2_5p,Cmi-…	24725	20728	22665	15410	20264	10996	22430	35638	12121	3181.56	3844.26	4820.84	2545.58	3565.37	2939.05	3276.51	5442.76	3375.13
gl411	ACAAACTCTGTTCGGGTACACG	UYJE01007891.1:312071-312050	22=	1	mga-nov-3		24509	22690	15261	34127	23060	13984	24815	29711	16207	3153.76	4208.14	3246.01	5637.45	4057.32	3737.69	3624.9	4537.57	4512.88
gl582	GAATGCCCCTTGAAATCCTGTA	UYJE01001349.1:282710-282689	22=	1	mga-nov-7		21261	9224	7731	10499	6840	2097	8622	10530	2984	2735.82	1710.7	1644.38	1734.33	1203.47	560.493	1259.48	1608.18	830.903
gl2277	TGGCAGTGTGGTTAGCTGGTTG	UYJE01010133.1:71562-71583	22=	1	mga-miR-34_5p	Aae-Mir-34_5p,Aga-Mir-34_5p,Agr-Mir-34_5p,Asu-Mir-34_5p,Bge-Mir-34_5p,Cel-Mir-34_5p,Csc-Mir-34-P19a_5p,Csc-Mir-34-P19b_5p,Csc-Mir-34-P19c_5p,Csc-Mir-34-P20_5p,Cte-Mir-34_5p,Dan-Mir-34_5p,Dlo-Mir-34_5p,Dma-Mir-34_5p,Dme-Mir-34_5p,Dmo-Mir-34_5p,Dpu-Mir-34_5p,Dsi-Mir-34_5p,Dya-Mir-34_5p,Esc-Mir-34_5p,Gpa-Mir-34_5p,Hme-Mir-34-P11_5p,Hme-Mir-34-P12_5p,Hmi-Mir-34_5p,Hru-Mir-34_5p,Isc-Mir-34_5p,Lan-Mir-…	20399	11840	9771	12518	13466	7846	20816	18094	6664	2624.9	2195.87	2078.29	2067.85	2369.29	2097.11	3040.74	2763.38	1855.61
gl2051	TTTCGGACCGCTCTGGACCT	UYJE01004688.1:59452-59471	20=	1	mga-denovo-11-5p		18614	8923	10876	12197	7120	9703	16646	10121	6628	2395.21	1654.88	2313.32	2014.83	1252.74	2593.45	2431.6	1545.71	1845.59
gl2011	ATTTGGCACTTGTGGAATAATCA	UYJE01006198.1:110961-110983	23=	1	mga-miR-96-P1i_5p	Esc-Mir-96-P1i_5p,Hru-Mir-96-P1i_5p,Lgi-Mir-96-P1i_5p,Mgi-Mir-96-P1i_5p,Pve-Mir-96-P1i_5p,Rph-Mir-96-P1i_5p,esc-miR-96-P1i_5p,lgi-miR-96b	17701	11473	13222	13320	14536	7712	15752	17883	7458	2277.73	2127.81	2812.32	2200.34	2557.55	2061.29	2301	2731.15	2076.7
gl1598	TATCACAGTCTGCTATGATGAGC	UYJE01007273.1:29213-29235	23=	1	mga-miR-2-o99-3p	War-Mir-2-o99_3p	14382	11296	7144	13223	9939	6940	11813	11310	4676	1850.64	2094.98	1519.53	2184.31	1748.73	1854.95	1725.61	1727.3	1302.05
gl2411	AGATATGTTTGATATATT	UYJE01001692.1:39743-39760;UYJE01005813.1:550050-550033;UYJE01007447.1:3202-3185	18=;18=;18=	1	mga-miR-190_5p	Agr-Mir-190_5p,Cte-Mir-190_5p,Efe-Mir-190-P11_5p,Efe-Mir-190-P12_5p,Hru-Mir-190_5p,Mgi-Mir-190_5p,Mom-Mir-190_5p,Pau-Mir-190_5p,Pca-Mir-190_5p,Pdu-Mir-190_5p,Pve-Mir-190_5p,Rph-Mir-190_5p,Snu-Mir-190_5p,cte-miR-190	13511	6539	4287	16874	8769	4474	5359	11768	4757	1738.57	1212.74	911.845	2787.42	1542.87	1195.83	782.826	1797.25	1324.6
gl860	TACTGGCCTGCAAAATCCCAAA	UYJE01009915.1:166721-166700	22=	1	mga-miR-193-P1m_3p	Agr-Mir-193-P1m_3p,Hru-Mir-193-P1_3p,Lgi-Mir-193-P1_3p,Mgi-Mir-193-P1_3p,Mom-Mir-193-P1_3p,Npo-Mir-193-P1_3p,Pve-Mir-193-P1_3p,lgi-miR-193,npo-miR-193-P1-3p	13210	5959	6804	10998	5042	3584	8083	6141	3408	1699.83	1105.17	1447.21	1816.76	887.12	957.944	1180.74	937.875	948.967
gl1823	TTAAGTACTAGTGCCGCGGGAA	UYJE01006490.1:52202-52223	22=	1	mga-miR-252-P2-5p	Mgi-Mir-252-P2_5p	12527	4830	3328	4347	6137	2126	6015	6245	1796	1611.95	895.782	707.865	718.083	1079.78	568.245	878.653	953.758	500.101
gl2443	CTTGGCACTTGTAGAATTCACTGA	UYJE01001798.1:52930-52907;UYJE01007209.1:173662-173685	24=;24=	1	mga-miR-96-P2_5p	Eba-Mir-96-P2_5p,Efe-Mir-96-P2n_5p,Mgi-Mir-96-P2l_5p	11630	9979	8807	12103	13702	6125	10210	15894	5645	1496.52	1850.73	1873.25	1999.3	2410.81	1637.11	1491.45	2427.39	1571.87
gl2127	ATAAAGCTAGGTTACCAAAGGC	UYJE01009234.1:100644-100665	22=	1	mga-miR-9-o18_3p	Asu-Mir-9-o18_3p,Cbr-Mir-9-P15_3p,Cel-Mir-9-P15_3p,Eba-Mir-9_3p,Esc-Mir-9_3p,Llo-Mir-9_3p,Mom-Mir-9_3p,Npo-Mir-9_3p,Ovu-Mir-9_3p,Pau-Mir-9_3p,Pca-Mir-9-P31_3p,Pcr-Mir-9-P38_3p,Pfl-Mir-9-v1_3p,Sko-Mir-9-v1_3p,War-Mir-9_3p,asu-miR-79-3p,bma-miR-9-3p,cbn-miR-79,cbr-miR-79,cel-miR-79-3p,crm-miR-79-3p,dpu-miR-9-3p,esc-miR-9_3p,hco-miR-79,isc-miR-79,lgi-miR-9-3p,npo-miR-9-3p,ovu-miR-9-3p,ppc-miR-79,sko…	11060	7122	10473	10392	7307	5250	11629	10267	4744	1423.18	1320.86	2227.61	1716.66	1285.64	1403.24	1698.73	1568.01	1320.98
gl1084	TCACAACCTCCTTGAATGAG	UYJE01005908.1:31305-31324;UYJE01005908.1:32626-32645	20=;20=	1	mga-miR-67-P5_3p	Mgi-Mir-67-P5_3p	10619	6903	2954	9496	4769	2859	5566	6336	3933	1366.43	1280.25	628.316	1568.65	839.087	764.163	813.064	967.656	1095.15
gl315	AAAGGTGTTTCACAGGCGCTAC	UYJE01007032.1:102658-102679	22=	1	mga-miR-2722_5p	Mgi-Mir-2722_5p	10354	5910	5686	12213	5879	4735	7612	8381	4794	1332.33	1096.08	1209.41	2017.47	1034.39	1265.59	1111.94	1279.98	1334.9
gl682	TGCCATTTTTATCAGTCACTG	UYJE01000044.1:185487-185507	21=	1	mga-miR-1984-P2_5p	Hru-Mir-1984-P2_5p,Lgi-Mir-1984-P2_5p,Mgi-Mir-1984-P2_5p,Pve-Mir-1984-P2_5p,Rph-Mir-1984-P2_5p,hru-miR-1985,lgi-miR-1985	9584	7082	7332	9639	7403	4428	8582	7852	4714	1233.25	1313.44	1559.52	1592.27	1302.53	1183.53	1253.63	1199.19	1312.63
gl1311	CCAGATCTAACTCTTCCAGCTCA	UYJE01009482.1:614309-614331	23=	1	mga-miR-750_3p	Agr-Mir-750_3p,Bge-Mir-750_3p,Csc-Mir-750-P7_3p,Csc-Mir-750-P8_3p,Cte-Mir-750_3p,Dgr-Mir-750_3p,Eba-Mir-750_3p,Efe-Mir-750-P2_3p,Esc-Mir-750_3p,Hru-Mir-750_3p,Isc-Mir-750_3p,Lan-Mir-750_3p,Lgi-Mir-750_3p,Llo-Mir-750_3p,Lpo-Mir-750-P4_3p,Lpo-Mir-750-P5_3p,Lpo-Mir-750-P6_3p,Mgi-Mir-750_3p,Mom-Mir-750_3p,Npo-Mir-750_3p,Obi-Mir-750_3p,Ofu-Mir-750_3p,Ovu-Mir-750_3p,Pau-Mir-750_3p,Pca-Mir-750_3p,Pdu-Mi…	9154	3806	2146	8928	3781	1152	4853	3019	3169	1177.92	705.869	456.454	1474.82	665.252	307.91	708.912	461.072	882.417
gl137	ATACCACATACATCACATTTA	UYJE01007594.1:22538-22518;UYJE01008593.1:49385-49405	21=;21=	1	mga-nov-6		8474	3737	3946	7155	3763	2973	6531	5084	3397	1090.42	693.072	839.314	1181.94	662.085	794.634	954.029	776.446	945.904
gl1590	TGGCGCCGTGTAAACATCTCTC	UYJE01007032.1:102692-102713	22=	1	mga-miR-2722_3p	Agr-Mir-2722_3p,Eba-Mir-2722_3p,Esc-Mir-2722_3p,Lhy-Mir-2722_3p,Mom-Mir-2722_3p,Npo-Mir-2722_3p,Obi-Mir-2722_3p,Ovu-Mir-2722_3p,esc-miR-2722_3p,npo-miR-2722-3p,obi-miR-2722-3p,ovu-miR-2722-3p	7640	4660	4826	3397	4856	3165	6470	6370	1726	983.099	864.254	1026.49	561.152	854.394	845.952	945.118	972.849	480.61
gl1171	TGACTAGATCCACACTCATCC	UYJE01001812.1:31609-31589	21=	1	mga-miR-279-P2_3p	Aae-Mir-279-P2_3p,Aga-Mir-279-P2_3p,Agr-Mir-279_3p,Bge-Mir-279-P2_3p,Bge-Mir-279-o6_3p,Csc-Mir-279-P9a_3p,Csc-Mir-279-P9b_3p,Cte-Mir-279-o34_3p,Dan-Mir-279-P2_3p,Dlo-Mir-279-P2_3p,Dma-Mir-279-o9_3p,Dme-Mir-279-P2_3p,Dmo-Mir-279-P2_3p,Dpu-Mir-279-o9_3p,Dsi-Mir-279-P2_3p,Dya-Mir-279-P2_3p,Eba-Mir-279_3p,Efe-Mir-279-o41_3p,Gpa-Mir-279-P2_3p,Gsp-Mir-279_3p,Hme-Mir-279-o1_3p,Hru-Mir-279_3p,Isc-Mir-279…	7167	2984	676	3064	2927	526	2226	3531	1907	922.234	553.419	143.785	506.143	514.994	140.591	325.167	539.267	531.009
gl2596	AGAACTGTGTCTGGACATCAG	UYJE01004021.1:66441-66461;UYJE01008328.1:217086-217066	21=;21=	1	mga-miR-219_3p	Mom-Mir-219_3p,Pve-Mir-219_3p	6942	3955	3951	8055	5378	3718	6914	6604	3084	893.281	733.503	840.377	1330.61	946.238	993.76	1009.98	1008.59	858.748
gl1978	TACCCTGTAGATCCGAATTTG	UYJE01009579.1:11022-11042	21=	1	mga-miR-10-P1c-v1_5p	Aca-Mir-10-P1c-v1_5p,Agr-Mir-10-P1_5p,Ami-Mir-10-P1c-v1_5p,Bfl-Mir-10-P1-v1_5p,Bla-Mir-10-P1-v1_5p,Bta-Mir-10-P1c-v1_5p,Cfa-Mir-10-P1c-v1_5p,Cja-Mir-10-P1c-v1_5p,Cli-Mir-10-P1c-v1_5p,Cmi-Mir-10-P1c-v1_5p,Cpi-Mir-10-P1c-v1_5p,Csc-Mir-10-P1q1-v1_5p,Csc-Mir-10-P1q2-v1_5p,Csc-Mir-10-P1q3-v1_5p,Dno-Mir-10-P1c-v1_5p,Dre-Mir-10-P1c2-v1_5p,Eba-Mir-10-P1_5p,Eca-Mir-10-P1c-v1_5p,Efe-Mir-10-P1_5p,Ete-Mir-10…	6558	3124	3926	4424	4422	2504	6187	5221	1856	843.869	579.384	835.06	730.802	778.034	669.278	903.778	797.369	516.808
gl1988	CAGTGCCGATGGGAATGGCATA	UYJE01000044.1:185524-185545	22=	1	mga-nov-10		5739	4543	2062	4896	12349	1243	2117	4892	1127	738.482	842.555	438.587	808.772	2172.76	332.233	309.245	747.123	313.816
gl1672	AAATGCCCCCAAAAATCCTAAA	UYJE01006321.1:21256-21235	22=	1	mga-miR-193-P2-3p	Mgi-Mir-193-P2_3p	5558	1681	785	2270	530	325	1179	1395	566	715.191	311.762	166.969	374.982	93.2514	86.8671	172.225	213.049	157.604
gl1668	AGGCGAGCCTAAACGATTCCGC	UYJE01008157.1:103463-103442	22=	1	mga-Novel-1_5p	Mgi-Novel-1_5p	5225	3193	2006	5739	2599	2043	4325	3478	1912	672.342	592.181	426.676	948.028	457.284	546.06	631.783	531.172	532.402
gl1143	TCTTTGGTTATCTAGCTGTATGA	UYJE01009234.1:100605-100627	23=	1	mga-miR-9-P10a_5p	Aae-Mir-9-P10a_5p,Aae-Mir-9-P10b_5p,Aca-Mir-9-P1_5p,Aca-Mir-9-P2_5p,Aca-Mir-9-P4_5p,Aga-Mir-9-P10_5p,Agr-Mir-9_5p,Ami-Mir-9-P1_5p,Ami-Mir-9-P2_5p,Ami-Mir-9-P3_5p,Ami-Mir-9-P4_5p,Asu-Mir-9-o17_5p,Bfl-Mir-9_5p,Bge-Mir-9-P10_5p,Bla-Mir-9_5p,Bta-Mir-9-P1_5p,Bta-Mir-9-P2_5p,Bta-Mir-9-P3_5p,Cfa-Mir-9-P1_5p,Cfa-Mir-9-P2_5p,Cfa-Mir-9-P3_5p,Cja-Mir-9-P1_5p,Cja-Mir-9-P2_5p,Cja-Mir-9-P3_5p,Cli-Mir-9-P2_5p,C…	5118	3362	4494	6058	4607	2352	6208	6346	2710	658.573	623.524	955.873	1000.72	810.584	628.651	906.846	969.183	754.607
gl535	TGAGTATTACATCAGGTACTGA	UYJE01000058.1:99716-99737;UYJE01005590.1:14735-14714	22=;22=	1	mga-miR-12_5p	Aae-Mir-12_5p,Aga-Mir-12_5p,Agr-Mir-12_5p,Bge-Mir-12_5p,Cte-Mir-12_5p,Dan-Mir-12_5p,Dgr-Mir-12_5p,Dlo-Mir-12_5p,Dma-Mir-12_5p,Dme-Mir-12_5p,Dmo-Mir-12_5p,Dpu-Mir-12_5p,Dsi-Mir-12_5p,Eba-Mir-12_5p,Efe-Mir-12-P1_5p,Esc-Mir-12_5p,Gsp-Mir-12_5p,Hru-Mir-12_5p,Isc-Mir-12_5p,Lan-Mir-12-P3_5p,Lan-Mir-12-P4_5p,Lgi-Mir-12_5p,Llo-Mir-12_5p,Lpo-Mir-12-P5_5p,Lpo-Mir-12-P6_5p,Mgi-Mir-12_5p,Mom-Mir-12_5p,Npo-Mi…	4624	2407	1937	4050	2661	1400	3440	3832	2873	595.006	446.407	412	669.021	468.193	374.197	502.505	585.237	799.995
gl101	GAGCTTTTGTGATTTAGCAAT	UYJE01007505.1:149093-149073	21=	1	mga-miR-153_5p	Mom-Mir-153_5p	3593	1637	1811	3474	1793	1333	2630	2800	1008	462.339	303.602	385.2	573.872	315.471	356.289	384.182	427.626	280.68
gl2128	TTAAGTAGTGGTGCCGCGGGTA	UYJE01006490.1:45441-45462	22=	1	mga-miR-252-P1-5p	Ovu-Mir-252-P1_5p	3578	902	782	1202	1450	617	2060	1964	421	460.409	167.287	166.331	198.559	255.122	164.914	300.919	299.949	117.229
gl2070	TAGCACCATTTGAAATCAG	UYJE01006404.1:116979-116997;UYJE01006404.1:121320-121338	19=;19=	1	mga-miR-29-P1b-v1_3p	Aca-Mir-29-P1b-v1_3p,Aca-Mir-29-P1d-v1_3p,Aca-Mir-29-P2b_3p,Aca-Mir-29-P2d_3p,Agr-Mir-29-P1_3p,Agr-Mir-29-P2_3p,Ami-Mir-29-P1b-v1_3p,Ami-Mir-29-P1d-v1_3p,Ami-Mir-29-P2b_3p,Ami-Mir-29-P2d_3p,Bfl-Mir-29-P1_3p,Bge-Mir-29-P1k_3p,Bge-Mir-29-P1l_3p,Bta-Mir-29-P1b-v1_3p,Bta-Mir-29-P1d7-v1_3p,Bta-Mir-29-P1d8-v1_3p,Bta-Mir-29-P2d8_3p,Cfa-Mir-29-P1b-v1_3p,Cfa-Mir-29-P1d-v1_3p,Cfa-Mir-29-P2d7_3p,Cfa-Mir-29-…	3244	2030	2411	3314	1828	1967	3189	2527	1862	417.431	376.488	512.82	547.441	321.629	525.746	465.839	385.932	518.479
gl77	TGAGACAGTGTGTCCTCCC	UYJE01003527.1:24660-24678;UYJE01003527.1:24960-24978	19=;19=	1	mga-miR-1994-P1_3p	Agr-Mir-1994-P1_3p,Cte-Mir-1994_3p,Eba-Mir-1994-P1_3p,Esc-Mir-1994-P1_3p,Esc-Mir-1994-P2_3p,Hru-Mir-1994-P1_3p,Hru-Mir-1994-P2_3p,Lan-Mir-1994-o2a_3p,Lan-Mir-1994-o2b_3p,Lgi-Mir-1994-P1_3p,Lgi-Mir-1994-P2_3p,Lhy-Mir-1994-P1_3p,Llo-Mir-1994_3p,Mgi-Mir-1994-P1_3p,Mgi-Mir-1994-P2_3p,Mom-Mir-1994-P1_3p,Npo-Mir-1994-P1_3p,Npo-Mir-1994-P2_3p,Obi-Mir-1994-P1_3p,Obi-Mir-1994-P2_3p,Ofu-Mir-1994-P10_3p,Ofu…	3120	1766	681	3689	5616	644	3012	2429	5330	401.475	327.526	144.849	609.387	988.113	172.131	439.984	370.965	1484.15
gl1638	TTATTGCTTGAGAATACACG	UYJE01001207.1:45720-45739;UYJE01006745.1:137096-137077	20=;20=	1	mga-miR-137-P11_3p	Aae-Mir-137-P11_3p,Aae-Mir-137-P12_3p,Aga-Mir-137_3p,Agr-Mir-137_3p,Bfl-Mir-137_3p,Bge-Mir-137-P13-v1_3p,Bge-Mir-137-P14-v1_3p,Bla-Mir-137-P15a_3p,Bla-Mir-137-P15b_3p,Bla-Mir-137-P15c_3p,Csc-Mir-137-P21_3p,Csc-Mir-137-P22_3p,Cte-Mir-137_3p,Dan-Mir-137_3p,Dgr-Mir-137_3p,Dma-Mir-137_3p,Dme-Mir-137_3p,Dmo-Mir-137_3p,Dpu-Mir-137_3p,Dsi-Mir-137_3p,Dya-Mir-137_3p,Eba-Mir-137_3p,Efe-Mir-137-P4_3p,Efe-Mi…	3097	1483	1569	2600	1980	1266	3310	2630	873	398.515	275.04	333.726	429.495	348.373	338.381	483.515	401.663	243.089
gl357	TATTGCACTTGTCCCGGCCTTC	UYJE01000597.1:31830-31809	22=	1	mga-miR-92-P3_3p	Aae-Mir-92-P3_3p,Aca-Mir-92-P1a_3p,Aca-Mir-92-P1c_3p,Aga-Mir-92-P3_3p,Agr-Mir-92-o109_3p,Ami-Mir-92-P1a_3p,Ami-Mir-92-P1c_3p,Bfl-Mir-92-o1_3p,Bfl-Mir-92-o2_3p,Bge-Mir-92-P3_3p,Bla-Mir-92-o1_3p,Bla-Mir-92-o2_3p,Bta-Mir-92-P1a_3p,Bta-Mir-92-P1c_3p,Cfa-Mir-92-P1a_3p,Cfa-Mir-92-P1c_3p,Cin-Mir-92-o69_3p,Cja-Mir-92-P1a_3p,Cja-Mir-92-P1c_3p,Cli-Mir-92-P1a_3p,Cli-Mir-92-P1c_3p,Cmi-Mir-92-P1a_3p,Cmi-Mir-9…	2580	1075	777	1622	1025	618	1594	1150	692	331.989	199.372	165.268	267.939	180.345	165.181	232.847	175.632	192.689
gl781	TAGCACCATTTGAAATCAGTGC	UYJE01006404.1:116979-117000	22=	1	mga-miR-29-P1b-v1_3p	Aca-Mir-29-P1b-v1_3p,Agr-Mir-29-P1_3p,Bfl-Mir-29-P1_3p,Bge-Mir-29-P1k_3p,Bge-Mir-29-P1l_3p,Cte-Mir-29-P1_3p,Eba-Mir-29-P1_3p,Hru-Mir-29-P1_3p,Lan-Mir-29-P1g_3p,Lan-Mir-29-P1h_3p,Llo-Mir-29-P1_3p,Mgi-Mir-29-P1_3p,Mom-Mir-29-P1_3p,Pau-Mir-29-P1_3p,Pca-Mir-29-o6_3p,Pve-Mir-29-P1_3p,Rph-Mir-29-P1_3p,Snu-Mir-29-P1_3p,War-Mir-29-P1_3p,bbe-miR-29b-3p,bfl-miR-29b-3p	2564	1463	1919	2886	1439	2299	1899	1849	2729	329.93	271.331	408.171	476.74	253.186	614.485	277.4	282.386	759.898
gl277	AATTGCACTCGTCCCGGCCTGCC	UYJE01000597.1:13583-13561;UYJE01000597.1:14140-14118	23=;23=	1	mga-miR-92-P4_3p	Dlo-Mir-92-P4_3p,Dma-Mir-92-P4_3p,Dpu-Mir-92-P4_3p,Esc-Mir-92_3p,Hru-Mir-92-o92_3p,Hru-Mir-92-o95_3p,Lan-Mir-92-o79a_3p,Lan-Mir-92-o79b_3p,Lan-Mir-92-o80a_3p,Lan-Mir-92-o80b_3p,Lan-Mir-92-o81_3p,Lhy-Mir-92-o106_3p,Lhy-Mir-92-o107_3p,Lhy-Mir-92-o108_3p,Llo-Mir-92-o126_3p,Llo-Mir-92-o127_5p,Llo-Mir-92-o128_3p,Llo-Mir-92-o129_3p,Llo-Mir-92-o131_3p,Mom-Mir-92-o114_3p,Mom-Mir-92-o115_3p,Npo-Mir-92-o50…	2466	759	662	840	955	407	2319	919	341	317.32	140.766	140.807	138.76	168.029	108.784	338.752	140.353	94.9524
gl1775	CGGGACTACGTCAACTACT	UYJE01002389.1:36258-36276;UYJE01009854.1:45120-45102	19=;19=	1	mga-miR-1990-P2_3p	Hru-Mir-1990-P2_3p,Lgi-Mir-1990-P2_3p,Mgi-Mir-1990-P2_3p,Rph-Mir-1990-P2_3p	2344	1209	904	1476	1612	564	2456	1785	536	301.621	224.224	192.281	243.821	283.625	150.748	358.765	272.611	149.251
gl834	TTCTCGTTTCACAGGGTATAT	UYJE01000551.1:39309-39329	21=	1	mga-miR-10-P6_5p	Mom-Mir-10-P6_5p,Pve-Mir-10-P6_3p,Rph-Mir-10-P6_3p	2271	1891	1564	3557	2713	1523	2358	2991	1299	292.227	350.709	332.663	587.582	477.342	407.073	344.449	456.796	361.71
gl1133	CAAGTTACTAGCCGAGATTA	UYJE01000058.1:98158-98177;UYJE01005590.1:16567-16548	20=;20=	1	mga-miR-216-P2d_3p	Lhy-Mir-216-P2d_3p,Mom-Mir-216-P2c_3p,Obi-Mir-216-P2d_3p,Ovu-Mir-216-P2d_3p,Pve-Mir-216-P2d_3p,obi-miR-216-P2d-3p,ovu-miR-216-P2d-3p	1897	1152	1162	1538	1196	703	1981	1638	594	244.102	213.652	247.157	254.063	210.432	187.9	289.378	250.161	165.401
gl1728	AAGCGGTGATTCTTTTGTCTCGC	UYJE01010128.1:56621-56643	23=	1	mga-denovo-13-5p		1847	852	676	2400	982	772	1285	1353	832	237.668	158.014	143.785	396.457	172.779	206.343	187.709	206.635	231.673
gl284	TTGGTCCCCTTCAACCAGCTG	UYJE01006951.1:73248-73268	21=	1	mga-miR-133_3p	Aae-Mir-133_3p,Aca-Mir-133-P1-v1_3p,Aca-Mir-133-P3-v1_3p,Aca-Mir-133-P4-v1_3p,Aga-Mir-133_3p,Ami-Mir-133-P1-v1_3p,Ami-Mir-133-P2-v1_3p,Ami-Mir-133-P3-v1_3p,Ami-Mir-133-P4-v1_3p,Asu-Mir-133_3p,Bfl-Mir-133-v1_3p,Bge-Mir-133_3p,Bla-Mir-133-v1_3p,Bta-Mir-133-P1-v1_3p,Bta-Mir-133-P2-v1_3p,Bta-Mir-133-P3-v1_3p,Cfa-Mir-133-P1-v1_3p,Cfa-Mir-133-P2-v1_3p,Cfa-Mir-133-P3-v1_3p,Cin-Mir-133_3p,Cja-Mir-133-P1_…	1839	1222	417	1949	1517	405	1065	734	2059	236.639	226.635	88.6959	321.956	266.91	108.25	155.572	112.099	573.334
gl2052	TTTCGGACATTATTCCTGATAG	UYJE01001309.1:203518-203497	22=	1	mga-denovo-2-5p		1805	1268	1175	2894	1392	1303	1206	1966	1624	232.263	235.166	249.922	478.061	244.917	348.27	176.169	300.254	452.207
gl1430	AGTGGAGAGGGTTTTATCTCATC	UYJE01009482.1:620214-620236	23=	1	mga-miR-1175-5p	Snu-Mir-1175_5p	1667	1624	510	1899	1322	348	764	1205	725	214.506	301.191	108.477	313.697	232.601	93.0146	111.603	184.032	201.878
gl2352	TGAGATTCAACTCCTCCAACTGC	UYJE01009482.1:620251-620273	23=	1	mga-miR-1175_3p	Agr-Mir-1175_3p,Bge-Mir-1175_3p,Cte-Mir-1175_3p,Dgr-Mir-1175_3p,Dlo-Mir-1175_3p,Eba-Mir-1175_3p,Efe-Mir-1175-P2_3p,Hme-Mir-1175_3p,Hru-Mir-1175_3p,Isc-Mir-1175_3p,Lan-Mir-1175_3p,Lgi-Mir-1175_3p,Llo-Mir-1175_3p,Lpo-Mir-1175-P6_3p,Lpo-Mir-1175-P7_3p,Mgi-Mir-1175_3p,Mom-Mir-1175_3p,Npo-Mir-1175_3p,Ofu-Mir-1175_3p,Pau-Mir-1175_3p,Pca-Mir-1175_3p,Pdu-Mir-1175_3p,Pve-Mir-1175_3p,Rph-Mir-1175_3p,Snu-Mi…	1633	1152	329	1869	790	272	595	612	672	210.131	213.652	69.9783	308.741	138.997	72.7011	86.9158	93.4668	187.12
gl1571	TGAGACAGTGTGTCCTCCCTAA	UYJE01003527.1:24960-24981	22=	1	mga-miR-1994-P2_3p	Mgi-Mir-1994-P2_3p,Pve-Mir-1994-P2a_3p	1554	876	314	2331	2407	295	1732	1064	3034	199.965	162.465	66.7878	385.059	423.502	78.8486	253.005	162.498	844.826
gl1306	AATTGCACCTGTCCCGGCCTGC	UYJE01000597.1:14608-14587	22=	1	mga-miR-92-o140_3p	Dgr-Mir-92-o140_3p,Dlo-Mir-92-P14_3p,Mgi-Mir-92-o34_3p	1389	563	379	614	532	369	884	546	364	178.733	104.415	80.6133	101.427	93.6033	98.6276	129.132	83.387	101.357
gl2176	TAATATCAGCTGGTAATCCTGAG	UYJE01000058.1:97608-97630;UYJE01005590.1:17051-17029	23=;23=	1	mga-miR-216-P1_5p	Esc-Mir-216-P1_5p,Hru-Mir-216-P1_5p,Lgi-Mir-216-P1_5p,Lhy-Mir-216-P1_5p,Mgi-Mir-216-P1_5p,Rph-Mir-216-P1_5p,esc-miR-216-P1_5p,lgi-miR-216b	1348	800	294	1191	554	248	567	643	637	173.458	148.37	62.5338	196.742	97.4741	66.2863	82.8256	98.2012	177.374
gl1059	TATCACAGCCAGCTTTGATGAGCT	UYJE01004174.1:105337-105360;UYJE01008245.1:144372-144395;UYJE01008245.1:144571-144594;UYJE01008245.1:144877-144900	24=;24=;24=;24=	1	mga-miR-2-P4-v1_3p	Aga-Mir-2-P4-v1_3p,Dan-Mir-2-P4a-v1_3p,Dan-Mir-2-P4b-v1_3p,Dgr-Mir-2-o37_3p,Dme-Mir-2-P4a-v1_3p,Dme-Mir-2-P4b-v1_3p,Dmo-Mir-2-P4a-v1_3p,Dmo-Mir-2-P4b-v1_3p,Dsi-Mir-2-P4a-v1_3p,Dsi-Mir-2-P4b-v1_3p,Dya-Mir-2-P4a-v1_3p,Dya-Mir-2-P4b-v1_3p,Gpa-Mir-2-P4a-v1_3p,Gpa-Mir-2-P4b-v1_3p,Hru-Mir-2-o51_3p,Hru-Mir-2-o52_3p,Hru-Mir-2-o53_3p,Mgi-Mir-2-o57_3p,Mgi-Mir-2-o60_3p,Npo-Mir-2-o48b_3p,aae-miR-2b,npo-miR-2…	1336	1034	591	1304	989	602	1043	1051	525	171.914	191.768	125.706	215.408	174.011	160.905	152.358	160.512	146.188
gl1254	TGATTGTCCAAACGCAATTC	UYJE01004021.1:66404-66423;UYJE01008328.1:217123-217104	20=;20=	1	mga-miR-219_5p	Aae-Mir-219_5p,Aca-Mir-219-P2_5p,Aca-Mir-219-P3_5p,Ami-Mir-219-P2_5p,Ami-Mir-219-P3_5p,Bfl-Mir-219_5p,Bge-Mir-219_5p,Bla-Mir-219_5p,Bta-Mir-219-P2_5p,Bta-Mir-219-P3_5p,Cfa-Mir-219-P2_5p,Cfa-Mir-219-P3_5p,Cja-Mir-219-P2_5p,Cja-Mir-219-P3_5p,Cli-Mir-219-P2_5p,Cmi-Mir-219-P2_5p,Cpi-Mir-219-P2_5p,Cpi-Mir-219-P3_5p,Cpo-Mir-219-P2_5p,Cpo-Mir-219-P3_5p,Csc-Mir-219_5p,Cte-Mir-219_5p,Dan-Mir-219_5p,Dlo-Mi…	1272	289	423	1107	346	327	821	547	334	163.678	53.5986	89.9721	182.866	60.8773	87.4017	119.929	83.5398	93.0032
gl256	TCAGCAGTTGTACCACTGATT	UYJE01004055.1:66385-66405	21=	1	mga-miR-1992_3p	Agr-Mir-1992_3p,Cte-Mir-1992_3p,Dgr-Mir-1992_3p,Eba-Mir-1992_3p,Efe-Mir-1992-P4_3p,Esc-Mir-1992_3p,Hru-Mir-1992_3p,Lan-Mir-1992_3p,Lgi-Mir-1992-P1_3p,Lgi-Mir-1992-P2_3p,Llo-Mir-1992_3p,Mgi-Mir-1992_3p,Mom-Mir-1992_3p,Npo-Mir-1992_3p,Obi-Mir-1992_3p,Ofu-Mir-1992_3p,Ovu-Mir-1992_3p,Pau-Mir-1992_3p,Pcr-Mir-1992_3p,Pdu-Mir-1992_3p,Pve-Mir-1992_3p,Rph-Mir-1992_3p,Snu-Mir-1992_3p,War-Mir-1992_3p,cla-mi…	1217	787	595	1932	902	528	1107	1176	782	156.601	145.959	126.556	319.148	158.703	141.126	161.707	179.603	217.75
gl1777	ACTTGCCAACGGGTTAGATAG	UYJE01002032.1:112854-112874;UYJE01003421.1:32455-32475	21=;21=	1	mga-denovo-3-3p		1205	718	475	1176	998	891	1247	1235	614	155.057	133.162	101.032	194.264	175.594	238.15	182.158	188.614	170.97
gl21	TTTGTGACCGTTATAATGGGCA	UYJE01006490.1:42359-42380;UYJE01006490.1:42870-42891;UYJE01006490.1:44128-44149	22=;22=;22=	1	mga-miR-2001_5p	Agr-Mir-2001_5p,Cte-Mir-2001-v1_5p,Dgr-Mir-2001_5p,Hru-Mir-2001_5p,Lan-Mir-2001-P3_5p,Lan-Mir-2001-P4_5p,Lgi-Mir-2001_5p,Lpo-Mir-2001_5p,Mgi-Mir-2001_5p,Mom-Mir-2001_5p,Ofu-Mir-2001_5p,Pfl-Mir-2001_5p,Pve-Mir-2001_5p,Sko-Mir-2001_5p,Snu-Mir-2001_5p,Xbo-Mir-2001_5p,cte-miR-2001,lgi-miR-2001,sko-miR-2001	1154	470	78	691	588	123	319	427	193	148.494	87.1672	16.5906	114.147	103.456	32.8759	46.5986	65.2129	53.7414
gl963	TCACAGCCAGCTTTGATGAGCC	UYJE01008245.1:143747-143768	22=	1	mga-miR-2-o36_3p	Dgr-Mir-2-o36_3p,Esc-Mir-2-o45-v1_3p,Lhy-Mir-2-o80_3p,Llo-Mir-2-o114-v1_3p,Mom-Mir-2-o85-v1_3p,Npo-Mir-2-o45_3p,Obi-Mir-2-o45-v1_3p,Ofu-Mir-2-o154_3p,Ovu-Mir-2-o45-v1_3p,Pau-Mir-2-o109_3p,Rph-Mir-2-o64_3p,esc-miR-2-o45-v1_3p,npo-miR-2-o45-3p,obi-miR-2-o45-v1-3p,ovu-miR-2-o45-v1-3p	1029	567	540	616	680	378	813	681	364	132.409	105.157	114.858	101.757	119.643	101.033	118.761	104.005	101.357
gl1391	TTTGGCACATTTTGTATGCTGGC	UYJE01007129.1:42140-42118;UYJE01007129.1:70367-70345	23=;23=	1	mga-denovo-14-5p		936	712	315	783	505	463	775	738	396	120.442	132.049	67.0005	129.344	88.8528	123.752	113.21	112.71	110.267
gl1460	TTTGTTCGTTCGGCTCGCGTTA	UYJE01008751.1:125082-125103	22=	1	mga-miR-375_3p	Aca-Mir-375_3p,Agr-Mir-375_3p,Ami-Mir-375_3p,Bfl-Mir-375_3p,Bla-Mir-375_3p,Bta-Mir-375_3p,Cfa-Mir-375_3p,Cja-Mir-375_3p,Cli-Mir-375_3p,Cpi-Mir-375_3p,Cpo-Mir-375_3p,Dno-Mir-375_3p,Dre-Mir-375-P1_3p,Dre-Mir-375-P2_3p,Eba-Mir-375_3p,Ebu-Mir-375_3p,Eca-Mir-375_3p,Efe-Mir-375_3p,Esc-Mir-375_3p,Ete-Mir-375_3p,Gga-Mir-375_3p,Gja-Mir-375_3p,Gmo-Mir-375-P2_3p,Hru-Mir-375_3p,Hsa-Mir-375_3p,Laf-Mir-375_3p,…	772	211	210	830	584	210	419	471	377	99.3393	39.1325	44.667	137.108	102.753	56.1295	61.2063	71.9328	104.977
gl2049	TATCACAGCCAGCTTTGATGA	UYJE01004174.1:105337-105357;UYJE01008245.1:143745-143765;UYJE01008245.1:144372-144392;UYJE01008245.1:144571-144591;UYJE01008245.1:144877-144897;UYJE01008245.1:145212-145232	21=;21=;21=;21=;21=;21=	1	mga-miR-2-P1-v1_3p	Aae-Mir-2-P1-v1_3p,Aae-Mir-2-P3_3p,Aae-Mir-2-P4-v1_3p,Aga-Mir-2-P1-v1_3p,Aga-Mir-2-P3_3p,Aga-Mir-2-P4-v1_3p,Agr-Mir-2-o85_3p,Asu-Mir-2-o7a_3p,Asu-Mir-2-o7b_3p,Bge-Mir-2-P1-v1_3p,Bge-Mir-2-P3-v1_3p,Bge-Mir-2-P4-v1_3p,Cbr-Mir-2-o3_3p,Cel-Mir-2-o3_3p,Csc-Mir-2-P3n_3p,Csc-Mir-2-P3o_3p,Csc-Mir-2-P4n_3p,Csc-Mir-2-P4o_3p,Cte-Mir-2-o14_3p,Dan-Mir-2-P3b_3p,Dan-Mir-2-P4a-v1_3p,Dan-Mir-2-P4b-v1_3p,Dgr-Mir-2…	729	516	366	1015	572	349	559	561	548	93.8061	95.6985	77.8482	167.668	100.641	93.2819	81.657	85.6779	152.592
gl1446	ATTATACACCGGTGCCAAGTAA	UYJE01006198.1:110997-111018	22=	1	mga-miR-96-P1i-3p	Ovu-Mir-96-P1i_3p	622	298	328	430	291	245	714	456	245	80.0376	55.2677	69.7656	71.0319	51.2003	65.4844	104.299	69.6419	68.2209
gl1358	TCAGCTGTCATGATGCCTTCT	UYJE01005099.1:60083-60103	21=	1	mga-miR-1989_5p	Cte-Mir-1989_5p,Hru-Mir-1989-P4a_5p,Hru-Mir-1989-P4b_5p,Lan-Mir-1989-P1_5p,Lan-Mir-1989-P2_5p,Lan-Mir-1989-P3_5p,Lgi-Mir-1989_5p,Snu-Mir-1989_5p,cte-miR-1989,lgi-miR-1989	605	305	178	1451	1185	235	281	266	253	77.8501	56.566	37.8606	239.691	208.496	62.8116	41.0476	40.6245	70.4486
gl483	CTTGGCACTGGCGGAATGATCAC	UYJE01006110.1:31685-31663	23=	1	mga-miR-96-P1_5p	Lan-Mir-96-P1_5p	525	396	328	603	497	297	381	702	209	67.5559	73.443	69.7656	99.6098	87.4452	79.3832	55.6553	107.212	58.1966
gl516	CTTACCCTGTTAATCGGAGAAG	UYJE01000551.1:39269-39290	22=	1	mga-miR-10-P6_5p	Hru-Mir-10-P6_5p,hru-miR-1991	511	251	176	584	391	246	460	343	205	65.7544	46.551	37.4352	96.4712	68.7949	65.7517	67.1954	52.3842	57.0828
gl1917	TAATCTCAGCTGGTAAATCTGA	UYJE01000058.1:98121-98142;UYJE01005590.1:16604-16583	22=;22=	1	mga-miR-216-P2c_5p	Npo-Mir-216-P2c_5p,npo-miR-216-P2c-5p	488	183	154	512	183	149	344	302	178	62.7948	33.9396	32.7558	84.5775	32.1981	39.8252	50.2505	46.1225	49.5646
gl2372	GTGCATTGTAGTTGCATTGCA	UYJE01006615.1:114119-114139	21=	1	mga-miR-33-P1_5p	Aca-Mir-33-P1_5p,Aca-Mir-33-P3_5p,Ami-Mir-33-P1_5p,Ami-Mir-33-P3_5p,Bfl-Mir-33-P6_5p,Bfl-Mir-33-P7_5p,Bge-Mir-33_5p,Bla-Mir-33-P6_5p,Bta-Mir-33-P3_5p,Cfa-Mir-33-P3_5p,Cja-Mir-33-P3_5p,Cli-Mir-33-P1_5p,Cli-Mir-33-P3_5p,Cmi-Mir-33-P1_5p,Cmi-Mir-33-P3_5p,Cpi-Mir-33-P1_5p,Cpi-Mir-33-P3_5p,Cpo-Mir-33-P3_5p,Csc-Mir-33_5p,Cte-Mir-33_5p,Dgr-Mir-33_5p,Dno-Mir-33-P3_5p,Ebu-Mir-33_5p,Eca-Mir-33-P3_5p,Efe-Mi…	386	130	90	513	235	180	311	296	146	49.6696	24.1101	19.143	84.7427	41.3473	48.111	45.4299	45.2062	40.6541
gl1693	TATTATGCTGTTATTCACGAGA	UYJE01004685.1:15109-15088	22=	1	mga-miR-1993_3p	Esc-Mir-1993_3p,Llo-Mir-1993_3p,Mgi-Mir-1993_3p,Npo-Mir-1993_3p,Obi-Mir-1993_3p,Ovu-Mir-1993_3p,Pdu-Mir-1993_3p,esc-miR-1993_3p,npo-miR-1993-3p,obi-miR-1993-3p,ovu-miR-1993-3p	346	143	30	349	87	43	151	96	162	44.5225	26.5211	6.381	57.6515	15.3073	11.4932	22.0576	14.6615	45.1094
gl236	AAATGCCATGAGGTGAAACAG	UYJE01002582.1:57869-57889;UYJE01002582.1:68615-68595;UYJE01003312.1:6954-6974;UYJE01006281.1:123853-123833;UYJE01008852.1:67103-67083	21=;21=;21=;21=;21=	1	mga-nov-18		341	121	326	210	96	121	202	120	195	43.8791	22.4409	69.3402	34.69	16.8908	32.3413	29.5075	18.3268	54.2983
gl2059	TTACCCTGTAGAACCGAGCGAG	UYJE01002347.1:15549-15528	22=	1	mga-miR-10-P5_5p	Agr-Mir-10-P5_5p,Mgi-Mir-10-P5_5p,Mom-Mir-10-P5_5p,Ofu-Mir-10-P5_5p,Pdu-Mir-10-P5_5p,Pve-Mir-10-P5_5p	311	144	126	95	162	57	193	124	40	40.0188	26.7066	26.8002	15.6931	28.5033	15.2352	28.1929	18.9377	11.1381
gl1012	CCATACTTCTTTATTATCCCATA	UYJE01006951.1:57938-57960	23=	1	mga-miR-1-P27-5p	Pve-Mir-1-P27_5p	298	202	91	272	137	59	88	108	118	38.346	37.4634	19.3557	44.9318	24.1046	15.7697	12.8548	16.4941	32.8574
gl1627	TAACACTTTATACTGACCGAAC	UYJE01005833.1:16068-16047	22=	1	mga-nov-20		298	306	304	220	228	97	346	278	83	38.346	56.7514	64.6608	36.3419	40.1157	25.9265	50.5426	42.4571	23.1116
gl1732	ATAGATAAATTGTATTCAGC	UYJE01002275.1:447090-447071;UYJE01002498.1:69821-69840;UYJE01002540.1:80921-80940;UYJE01003392.1:3918-3937;UYJE01006792.1:286599-286580;UYJE01006961.1:24244-24263;UYJE01010243.1:69315-69296	20=;20=;20=;20=;20=;20=;20=	1	mga-denovo-4-5p		273	365	97	115	79	83	15	484	37	35.129	67.6937	20.6319	18.9969	13.8997	22.1845	2.19115	73.9182	10.3028
gl944	TGTCATGGAGTTGCTCTCTTTA	UYJE01003750.1:354408-354429	22=	1	mga-miR-281_3p	Asu-Mir-281_3p,Bfl-Mir-281_3p,Cin-Mir-281_3p,Cmi-Mir-281-v1_3p,Cte-Mir-281_3p,Dgr-Mir-281_3p,Dlo-Mir-281_3p,Eba-Mir-281_3p,Ebu-Mir-281_3p,Efe-Mir-281-P5_3p,Efe-Mir-281-P7_3p,Lan-Mir-281-P10_3p,Lan-Mir-281-P11_3p,Lgi-Mir-281-P8_3p,Lgi-Mir-281-P9_3p,Lhy-Mir-281_3p,Llo-Mir-281_3p,Mgi-Mir-281_3p,Mom-Mir-281_3p,Ofu-Mir-281_3p,Pdu-Mir-281_3p,Pfl-Mir-281_3p,Pma-Mir-281-P13_3p,Pve-Mir-281-P19_3p,Pve-Mir-…	230	68	2	86	72	29	46	52	11	29.5959	12.6114	0.4254	14.2064	12.6681	7.75122	6.71954	7.94162	3.06298
gl292	AATGGCACTGGTAGAATTCACGG	UYJE01001798.1:65616-65594;UYJE01007209.1:160993-161015	23=;23=	1	mga-miR-96-P3_5p	Cte-Mir-96-P3_5p,Eba-Mir-96-P3_5p,Hru-Mir-96-P3_5p,Lan-Mir-96-P3_5p,Lgi-Mir-96-P3_5p,Lhy-Mir-96-P3_5p,Llo-Mir-96-P3_5p,Mgi-Mir-96-P3_5p,Pau-Mir-96-P3g_5p,Pdu-Mir-96-P3_5p,Pve-Mir-96-P3_5p,Rph-Mir-96-P3_5p,Snu-Mir-96-P3_5p,lgi-miR-183	190	75	25	21	72	4	25	49	3	24.4488	13.9097	5.3175	3.469	12.6681	1.06913	3.65192	7.48345	0.835358
gl2617	AGCCTTATCTTCCAATCACTGC	UYJE01000044.1:184309-184288	22=	1	mga-nov-22		169	110	114	116	140	32	93	135	52	21.7466	20.4008	24.2478	19.1621	24.6325	8.55307	13.5852	20.6177	14.4795
gl1585	TAAATGCATAATCTGGTATGTGA	UYJE01010133.1:68029-68051	23=	1	mga-miR-277_3p	Eba-Mir-277_3p,Mgi-Mir-277_3p,Pca-Mir-277_3p,Pve-Mir-277_3p,Rph-Mir-277_3p	167	119	32	180	131	53	113	170	76	21.4892	22.07	6.8064	29.7343	23.0489	14.166	16.5067	25.963	21.1624
gl2239	TGAGACAGTGTGTCCTCCCTTG	UYJE01003527.1:24660-24681	22=	1	mga-miR-1994-P1_3p	Agr-Mir-1994-P1_3p,Eba-Mir-1994-P1_3p,Esc-Mir-1994-P1_3p,Hru-Mir-1994-P1_3p,Lgi-Mir-1994-P1_3p,Mgi-Mir-1994-P1_3p,Mom-Mir-1994-P1_3p,Npo-Mir-1994-P1_3p,Obi-Mir-1994-P1_3p,Ovu-Mir-1994-P1_3p,Pau-Mir-1994-o4_3p,Pve-Mir-1994-P1_3p,Pve-Mir-1994-P2b_3p,War-Mir-1994-P1_3p,esc-miR-1994-P1_3p,lgi-miR-1994a,npo-miR-1994-P1-3p,obi-miR-1994-P1-3p,ovu-miR-1994-P1-3p	160	67	26	207	233	31	157	99	291	20.5885	12.426	5.5302	34.1944	40.9954	8.28579	22.9341	15.1196	81.0298
gl1760	GAACTCTGAGGAAACACAACTC	UYJE01005398.1:119873-119852	22=	1	mga-nov-21		159	168	101	312	92	46	339	158	67	20.4598	31.1576	21.4827	51.5394	16.187	12.295	49.5201	24.1303	18.6563
gl1437	GCACCATTTGAAATCAGTT	UYJE01006404.1:121322-121340;UYJE01009184.1:368475-368493	19=;19=	1	mga-miR-29-P2_3p	Agr-Mir-29-P2_3p,Cte-Mir-29-P2_3p,Eba-Mir-29-P2_3p,Ebu-Mir-29-P2e_3p,Esc-Mir-29-P2_3p,Hru-Mir-29-P2_3p,Lan-Mir-29-P2i_3p,Lan-Mir-29-P2j_3p,Lgi-Mir-29-P2_3p,Lhy-Mir-29-P2_3p,Llo-Mir-29-P2_3p,Mgi-Mir-29-P2_3p,Mom-Mir-29-P2_3p,Npo-Mir-29-P2_3p,Obi-Mir-29-P2_3p,Ofu-Mir-29-P2_3p,Ovu-Mir-29-P2_3p,Pdu-Mir-29-P2_3p,Pma-Mir-29-P1o1_3p,Pve-Mir-29-P2_3p,Snu-Mir-29-P2q_3p,War-Mir-29-P2_3p,cte-miR-29a,esc-miR…	123	76	82	104	40	59	93	82	58	15.8274	14.0951	17.4414	17.1798	7.03784	15.7697	13.5852	12.5233	16.1503
gl1304	TAAAACTGATCATTGACTGGGC	UYJE01001690.1:219109-219088;UYJE01004218.1:77518-77497;UYJE01005898.1:211260-211239;UYJE01005985.1:33790-33769	22=;22=;22=;22=	1	mga-nov-30		106	24	29	14	19	27	25	25	18	13.6398	4.45109	6.1683	2.31267	3.34298	7.21665	3.65192	3.81809	5.01215
gl235	TAAATGCTACCCCAACACTGGGA	UYJE01007946.1:340671-340693;UYJE01008113.1:163652-163630	23=;23=	1	mga-nov-27		88	25	11	52	18	11	18	24	20	11.3236	4.63655	2.3397	8.5899	3.16703	2.94012	2.62939	3.66536	5.56906
gl800	TAATGCAATTTTATTTGGTAA	UYJE01005244.1:54630-54650;UYJE01005503.1:35598-35578	21=;21=	1	mga-nov-24		67	73	67	111	114	38	76	116	29	8.62141	13.5387	14.2509	18.3361	20.0579	10.1568	11.1018	17.7159	8.07513
gl2534	TCAGTGTTGTAGTAGTGTTACA	UYJE01007946.1:340635-340656;UYJE01008113.1:163688-163667	22=;22=	1	mga-nov-32		65	27	7	43	32	10	24	24	15	8.36406	5.00748	1.4889	7.10319	5.63027	2.67283	3.50585	3.66536	4.17679
gl238	TGAGTATTTATTTTTTCTTAACC	UYJE01003536.1:9943-9921;UYJE01009052.1:734860-734838	23=;23=	1	mga-nov-38		52	10	4	22	12	9	15	34	8	6.69125	1.85462	0.8508	3.63419	2.11135	2.40555	2.19115	5.1926	2.22762
gl448	TTGCGTAGGTGTTGTGCACAG	UYJE01007160.1:727586-727606	21=	1	mga-miR-242_5p	Cte-Mir-242_5p,cte-miR-242	46	2	7	4	0	5	4	10	9	5.91918	0.370924	1.4889	0.660762	0	1.33642	0.584308	1.52724	2.50608
gl333	AACTGTACTTGCAAGGTTTAAGG	UYJE01001949.1:147850-147872	23=	1	mga-nov-28		44	17	23	47	17	16	59	35	19	5.66182	3.15286	4.8921	7.76395	2.99108	4.27653	8.61854	5.34532	5.2906
gl685	TCCGGGAAGTGATCAGGTTTTGA	UYJE01001690.1:219146-219124;UYJE01004218.1:77555-77533;UYJE01005898.1:211297-211275;UYJE01005985.1:33827-33805	23=;23=;23=;23=	1	mga-nov-29		36	14	24	62	21	12	27	10	19	4.6324	2.59647	5.1048	10.2418	3.69487	3.2074	3.94408	1.52724	5.2906
gl54	CCTAGATACTTTTAGCTTTGA	UYJE01004767.1:5420-5400;UYJE01005523.1:95557-95577;UYJE01006179.1:19406-19386;UYJE01006528.1:106029-106049	21=;21=;21=;21=	1	mga-nov-34		33	19	0	61	27	5	4	18	12	4.24637	3.52378	0	10.0766	4.75054	1.33642	0.584308	2.74902	3.34143
gl2129	CAAAAGTTATAAGTCAATATA	UYJE01006914.1:124167-124187	21=	1	mga-nov-26		31	22	18	44	19	16	9	36	20	3.98901	4.08017	3.8286	7.26838	3.34298	4.27653	1.31469	5.49805	5.56906
gl2066	TGCTGCACTTTTCTCAATCCAC	UYJE01006739.1:24824-24845;UYJE01006846.1:39011-38990;UYJE01007566.1:78950-78971;UYJE01008717.1:50605-50584;UYJE01009756.1:102978-102957	22=;22=;22=;22=;22=	1	mga-nov-37		30	29	12	22	16	6	38	20	9	3.86033	5.3784	2.5524	3.63419	2.81514	1.6037	5.55092	3.05447	2.50608
gl1028	AAAACGGATCATTGCCTGGG	UYJE01005602.1:134177-134158;UYJE01005995.1:64925-64906;UYJE01006132.1:23167-23148	20=;20=;20=	1	mga-nov-31		29	26	34	33	26	17	9	18	17	3.73166	4.82202	7.2318	5.45128	4.5746	4.54382	1.31469	2.74902	4.7337
gl2476	CTGGCCTGCAAAATCCCAAA	UYJE01009282.1:74479-74498;UYJE01009915.1:166719-166700	20=;20=	1	mga-miR-193-P1_3p	Mgi-Mir-193-P1_3p,Npo-Mir-193-P1_3p,Pve-Mir-193-P1_3p,npo-miR-193-P1-3p	28	8	5	20	8	6	18	8	3	3.60298	1.4837	1.0635	3.30381	1.40757	1.6037	2.62939	1.22179	0.835358
gl1229	TCTGGTTTTAACATATGGATACA	UYJE01005013.1:28514-28536;UYJE01005013.1:29214-29236;UYJE01005013.1:31633-31655;UYJE01005013.1:32509-32531	23=;23=;23=;23=	1	mga-nov-33		27	25	8	41	12	18	21	21	12	3.4743	4.63655	1.7016	6.77281	2.11135	4.8111	3.06762	3.20719	3.34143
gl1196	ACTGGGGACTTTATATGTGTTGA	UYJE01000480.1:6882-6860;UYJE01004741.1:39693-39715;UYJE01006675.1:149240-149218;UYJE01007034.1:133559-133581	23=;23=;23=;23=	1	mga-denovo-1-5p		24	7	28	127	13	8	8	23	10	3.08827	1.29824	5.9556	20.9792	2.2873	2.13827	1.16862	3.51264	2.78453
gl1583	TGGTGGTCAGTGCAGCGGTAGA	UYJE01002879.1:127864-127885	22=	1	mga-denovo-6-5p		22	4	14	4	7	2	21	14	2	2.83091	0.741849	2.9778	0.660762	1.23162	0.534567	3.06762	2.13813	0.556906
gl768	TTAACTTTGTGATTATTTTCGG	UYJE01001949.1:147889-147910	22=	1	mga-nov-41		21	12	12	13	9	6	20	9	5	2.70223	2.22555	2.5524	2.14748	1.58351	1.6037	2.92154	1.37451	1.39226
gl2490	ATCTGACTGGACACTGCAGTGTG	UYJE01008323.1:74359-74337	23=	1	mga-denovo-10-5p		20	6	21	2	0	75	5	17	6	2.57356	1.11277	4.4667	0.330381	0	20.0463	0.730385	2.5963	1.67072
gl2589	AATTGCAACTTGGTCAGAATTT	UYJE01002705.1:42305-42284;UYJE01004006.1:87619-87598;UYJE01007127.1:145648-145669;UYJE01010540.1:184342-184321	22=;22=;22=;22=	1	mga-nov-44		19	5	6	13	4	2	10	8	3	2.44488	0.927311	1.2762	2.14748	0.703784	0.534567	1.46077	1.22179	0.835358
gl1751	TTTGCTTTGAGCTAAGTTCAT	UYJE01009839.1:69858-69878	21=	1	mga-nov-25		18	19	30	105	28	1	2	62	25	2.3162	3.52378	6.381	17.345	4.92649	0.267283	0.292154	9.46886	6.96132
gl2019	GATAGAAACATTGAAGTGCACT	UYJE01006786.1:16700-16679	22=	1	mga-nov-51		17	13	0	15	3	3	0	5	1	2.18752	2.41101	0	2.47786	0.527838	0.80185	0	0.763618	0.278453
gl1862	TAGCACTAGTGTATATTTAAAA	UYJE01000811.1:62823-62802;UYJE01000811.1:93239-93218;UYJE01002247.1:99723-99702;UYJE01003498.1:294113-294134;UYJE01003612.1:30118-30139;UYJE01003793.1:316096-316075;UYJE01006485.1:28216-28195;UYJE01006485.1:29711-29690;UYJE01006661.1:61938-61917;UYJE01008350.1:3337-3316;UYJE01008463.1:45820-45841	22=;22=;22=;22=;22=;22=;22=;22=;22=;22=;22=	1	mga-denovo-7-3p		16	14	10	30	13	5	8	9	11	2.05885	2.59647	2.127	4.95571	2.2873	1.33642	1.16862	1.37451	3.06298
gl480	CACCATTTGAAATCAGTT	UYJE01000527.1:11481-11464;UYJE01006404.1:121323-121340;UYJE01009184.1:368476-368493	18=;18=;18=	1	mga-miR-29-P2_3p	Agr-Mir-29-P2_3p,Cte-Mir-29-P2_3p,Eba-Mir-29-P2_3p,Ebu-Mir-29-P2e_3p,Esc-Mir-29-P2_3p,Hru-Mir-29-P2_3p,Lan-Mir-29-P2i_3p,Lan-Mir-29-P2j_3p,Lgi-Mir-29-P2_3p,Lhy-Mir-29-P2_3p,Llo-Mir-29-P2_3p,Mgi-Mir-29-P2_3p,Mom-Mir-29-P2_3p,Npo-Mir-29-P2_3p,Obi-Mir-29-P2_3p,Ofu-Mir-29-P2_3p,Ovu-Mir-29-P2_3p,Pdu-Mir-29-P2_3p,Pma-Mir-29-P1o1_3p,Pve-Mir-29-P2_3p,Snu-Mir-29-P2q_3p,War-Mir-29-P2_3p,cte-miR-29a,esc-miR…	15	9	2	18	5	2	16	10	3	1.93017	1.66916	0.4254	2.97343	0.87973	0.534567	2.33723	1.52724	0.835358
gl2202	TTGGTTACTATTTATGTGTTGC	UYJE01000685.1:46104-46125;UYJE01002027.1:179322-179301;UYJE01003390.1:31211-31190;UYJE01009047.1:12198-12219;UYJE01009273.1:218404-218383	22=;22=;22=;22=;22=	1	mga-denovo-9-5p		14	6	14	13	8	3	13	16	5	1.80149	1.11277	2.9778	2.14748	1.40757	0.80185	1.899	2.44358	1.39226
gl2477	CATTTTATTAAGTACTTGGAC	UYJE01004296.1:549950-549970;UYJE01009762.1:17055-17035;UYJE01009869.1:49788-49768	21=;21=;21=	1	mga-nov-49		14	2	16	3	5	0	4	5	2	1.80149	0.370924	3.4032	0.495571	0.87973	0	0.584308	0.763618	0.556906
gl22	TGCCGTCTCCCTGACTTCCTT	UYJE01002879.1:127898-127918	21=	1	mga-denovo-6-3p		11	2	7	13	10	0	13	8	2	1.41546	0.370924	1.4889	2.14748	1.75946	0	1.899	1.22179	0.556906
gl331	AGACTCAGCTACTTGACAAGG	UYJE01000100.1:125047-125067	21=	1	mga-denovo-5-5p		10	17	16	12	10	20	25	5	2	1.28678	3.15286	3.4032	1.98228	1.75946	5.34567	3.65192	0.763618	0.556906
gl1650	AATGTAAAGAAGTATGTA	UYJE01001297.1:44029-44012;UYJE01006951.1:57981-57998	18=;18=	1	mga-miR-1-P1_3p	Aca-Mir-1-P1_3p,Aca-Mir-1-P3_3p,Agr-Mir-1_3p,Ami-Mir-1-P1_3p,Ami-Mir-1-P3_3p,Asu-Mir-1_3p,Bfl-Mir-1_3p,Bla-Mir-1_3p,Bta-Mir-1-P1_3p,Bta-Mir-1-P3_3p,Cbr-Mir-1_3p,Cel-Mir-1_3p,Cfa-Mir-1-P1_3p,Cfa-Mir-1-P3_3p,Cja-Mir-1-P1_3p,Cja-Mir-1-P3_3p,Cli-Mir-1-P1_3p,Cli-Mir-1-P3_3p,Cmi-Mir-1-P1_3p,Cmi-Mir-1-P3_3p,Cmi-Mir-1-P4_3p,Cpi-Mir-1-P1_3p,Cpi-Mir-1-P3_3p,Cpo-Mir-1-P1_3p,Cte-Mir-1_3p,Dno-Mir-1-P1_3p,Dno-…	9	4	6	16	4	1	3	5	3	1.1581	0.741849	1.2762	2.64305	0.703784	0.267283	0.438231	0.763618	0.835358
gl1644	ATTTGGCACTTGTGGAATA	UYJE01000789.1:31438-31456;UYJE01006198.1:110961-110979	19=;19=	1	mga-miR-96-P1i_5p	Esc-Mir-96-P1i_5p,Hru-Mir-96-P1i_5p,Lgi-Mir-96-P1i_5p,Mgi-Mir-96-P1i_5p,Pve-Mir-96-P1i_5p,Rph-Mir-96-P1i_5p,esc-miR-96-P1i_5p,lgi-miR-96b	8	4	6	5	4	7	3	5	5	1.02942	0.741849	1.2762	0.825952	0.703784	1.87098	0.438231	0.763618	1.39226
gl402	TAAACCTACAAATTTCAGCAGA	UYJE01002613.1:274434-274413	22=	1	mga-denovo-12-3p		7	6	2	9	3	3	6	3	0	0.900745	1.11277	0.4254	1.48671	0.527838	0.80185	0.876462	0.458171	0
gl2221	TAGCACCATTTGAAATCA	UYJE01000597.1:199834-199817;UYJE01006404.1:116979-116996;UYJE01006404.1:121320-121337	18=;18=;18=	1	mga-miR-29-P1b-v1_3p	Aca-Mir-29-P1b-v1_3p,Aca-Mir-29-P1d-v1_3p,Agr-Mir-29-P1_3p,Agr-Mir-29-P2_3p,Ami-Mir-29-P1b-v1_3p,Ami-Mir-29-P1d-v1_3p,Bfl-Mir-29-P1_3p,Bge-Mir-29-P1k_3p,Bge-Mir-29-P1l_3p,Bta-Mir-29-P1b-v1_3p,Bta-Mir-29-P1d7-v1_3p,Bta-Mir-29-P1d8-v1_3p,Cfa-Mir-29-P1b-v1_3p,Cfa-Mir-29-P1d-v1_3p,Cja-Mir-29-P1b-v1_3p,Cja-Mir-29-P1d-v1_3p,Cli-Mir-29-P1b-v1_3p,Cli-Mir-29-P1d-v1_3p,Cmi-Mir-29-P1b_3p,Cmi-Mir-29-P1d_3p,C…	7	4	10	7	6	5	6	8	9	0.900745	0.741849	2.127	1.15633	1.05568	1.33642	0.876462	1.22179	2.50608
gl1093	TCTGTTATCTCACTTGTAGTTCC	UYJE01009682.1:18036-18058	23=	1	mga-nov-50		5	1	10	5	2	2	7	4	2	0.643389	0.185462	2.127	0.825952	0.351892	0.534567	1.02254	0.610894	0.556906
gl2083	TTTGATTTGAGCTCAGTTCAT	UYJE01005447.1:18642-18622;UYJE01009574.1:60621-60641	21=;21=	1	mga-nov-52		4	3	0	0	0	5	0	33	0	0.514711	0.556387	0	0	0	1.33642	0	5.03988	0
gl346	TGGATTTCCCAAGATCCGTGA	UYJE01002389.1:36608-36628;UYJE01009854.1:44773-44753	21=;21=	1	mga-miR-1986-P1_3p	Hru-Mir-1986-P1_3p,Hru-Mir-1986-P2_3p,Lgi-Mir-1986_3p,Lhy-Mir-1986_3p,Mgi-Mir-1986_3p,Npo-Mir-1986_3p,Obi-Mir-1986_3p,Ovu-Mir-1986_3p,Pve-Mir-1986-P3_3p,Rph-Mir-1986_3p,hru-miR-1986,lgi-miR-1986,npo-miR-1986-3p,obi-miR-1986-3p,ovu-miR-1986-3p	3	9	2	10	6	0	11	7	6	0.386033	1.66916	0.4254	1.6519	1.05568	0	1.60685	1.06906	1.67072
gl1844	TAACACTGGCTATTGCTTGAA	UYJE01001917.1:55191-55171;UYJE01006040.1:38634-38654	21=;21=	1	mga-nov-46		1	2	2	5	3	4	3	10	2	0.128678	0.370924	0.4254	0.825952	0.527838	1.06913	0.438231	1.52724	0.556906
gl142	TGACTATCCAGCGTAACGGAGA	UYJE01004889.1:115165-115186	22=	1	mga-nov-42		0	7	0	1	0	4	9	8	5	0	1.29824	0	0.16519	0	1.06913	1.31469	1.22179	1.39226
gl585	TGCACCAATATGATGCCAGAGGGA	UYJE01000932.1:412386-412363	24=	1	mga-Novel-4_3p	Mgi-Novel-4_3p	0	7	0	0	0	0	4	17	3	0	1.29824	0	0	0	0	0.584308	2.5963	0.835358

## Sheet: novel miRNAs
Dataset 4. Identification of bona fide novel miRNAs in M. galloprovincialis
consensus mature sequence	miRNA ID	provisional id	miRDeep2 score	total read count	mature read count	star read count	Star sequence	Star mature?	Sample	Hairpin precursor	Both arms expressed	5' homogeneity	2nt offset	bona fide?	miRGeneDB
ATCTGACTGGACACTGCAGTGTG	mga-denovo-10-5p	UYJE01008323.1_17563	46	88	82	6	ACAACCATGTCTAGTCAGAA	FALSE	2R2	✔	✔	✔	✔	✔
TTTCGGACCGCTCTGGACCT	mga-denovo-11-5p	UYJE01004688.1_15408	8500	16725	16715	10	GACCGGTGAGGTCCGGAAAC	FALSE	1H1	✔	✔	✔	✔	✔
TTTCGGACCGCTCTGGACCT	mga-denovo-11-5p	UYJE01004688.1_17920	3600	7165	7158	7	GACCGGTGAGGTCCGGAAAC	FALSE	1R2	✔	✔	✔	✔	✔
TTTCGGACCGCTCTGGACCT	mga-denovo-11-5p	UYJE01004688.1_21160	6200	12275	12261	14	GACCGGTGAGGTCCGGAAAC	FALSE	1R1	✔	✔	✔	✔	✔
TTTCGGACCGCTCTGGACCT	mga-denovo-11-5p	UYJE01004688.1_9060	9500	18724	18715		GACCGGTGAGGTCCGGAAAC	FALSE	1N1	✔	✔	✔	✔	✔
TAAACCTACAAATTTCAGCAGA	mga-denovo-12-3p	UYJE01002613.1_12102	12	22	12	10	AGCTGAAATTCGTAGCGGTTATC	FALSE	1R1	✔	✔	✔	✔	✔
AAGCGGTGATTCTTTTGTCTCGC	mga-denovo-13-5p	UYJE01010128.1_19288	1000	2070	1862	208	AGGGCAGAATTGTCACCGACCAC	FALSE	1N1	✔	✔	✔	✔	✔
AAGCGGTGATTCTTTTGTCTCGC	mga-denovo-13-5p	UYJE01010128.1_20866	400	791	695	96	AGGGCAGAATTGTCACCGACCAC	FALSE	2N2	✔	✔	✔	✔	✔
AAGCGGTGATTCTTTTGTCTCGC	mga-denovo-13-5p	UYJE01010128.1_21410	430	861	784	77	AGGGCAGAATTGTCACCGACCAC	FALSE	2R2	✔	✔	✔	✔	✔
AAGCGGTGATTCTTTTGTCTCGC	mga-denovo-13-5p	UYJE01010128.1_32570	450	885	839	46	AGGGCAGAATTGTCACCGACCAC	FALSE	2H2	✔	✔	✔	✔	✔
AAGCGGTGATTCTTTTGTCTCGC	mga-denovo-13-5p	UYJE01010128.1_33182	740	1466	1298	168	AGGGCAGAATTGTCACCGACCAC	FALSE	1H1	✔	✔	✔	✔	✔
AAGCGGTGATTCTTTTGTCTCGC	mga-denovo-13-5p	UYJE01010128.1_38710	560	1098	992	106	AGGGCAGAATTGTCACCGACCAC	FALSE	1R2	✔	✔	✔	✔	✔
AAGCGGTGATTCTTTTGTCTCGC	mga-denovo-13-5p	UYJE01010128.1_39188	480	941	861	80	AGGGCAGAATTGTCACCGACCAC	FALSE	1N2	✔	✔	✔	✔	✔
AAGCGGTGATTCTTTTGTCTCGC	mga-denovo-13-5p	UYJE01010128.1_45516	1300	2619	2436	183	AGGGCAGAATTGTCACCGACCAC	FALSE	1R1	✔	✔	✔	✔	✔
AAGCGGTGATTCTTTTGTCTCGC	mga-denovo-13-5p	UYJE01010128.1_45860	770	1518	1373	145	AGGGCAGAATTGTCACCGACCAC	FALSE	1H2	✔	✔	✔	✔	✔
TTTGGCACATTTTGTATGCTGGC	mga-denovo-14-5p	UYJE01007129.1_27115	370	727	721	6	CAGCATCTCAGTGTGTCAATGCA	FALSE	1N2	✔	✔	✔	✔	✔
ACTGGGGACTTTATATGTGTTGA	mga-denovo-1-5p	UYJE01000480.1_1101	21	43	34	9	AACACTATCAAGTTCTTGGAT	FALSE	2N2	✔	✔	✔	✔	✔
ACTGGGGACTTTATATGTGTTGA	mga-denovo-1-5p	UYJE01000480.1_1115	11	23	10	13	AACACTATCAAGTTCTTGGA	FALSE	2R2	✔	✔	✔	✔	✔
ACTGGGGACTTTATATGTGTTGA	mga-denovo-1-5p	UYJE01000480.1_2301	81	160	141	19	AACACTATCAAGTTCTTGGAT	FALSE	1R1	✔	✔	✔	✔	✔
ACTGGGGACTTTATATGTGTTGA	mga-denovo-1-5p	UYJE01000480.1_2327	30	60	41	19	AACACTATCAAGTTCTTGGAT	FALSE	1H2	✔	✔	✔	✔	✔
ACTGGGGACTTTATATGTGTTGA	mga-denovo-1-5p	UYJE01000480.1_891	23	47	28	19	AACACTATCAAGTTCTTGGAT	FALSE	1N1	✔	✔	✔	✔	✔
ACTGGGGACTTTATATGTGTTGA	mga-denovo-1-5p	UYJE01004741.1_21348	81	160	141	19	AACACTATCAAGTTCTTGGAT	FALSE	1R1	✔	✔	✔	✔	✔
ACTGGGGACTTTATATGTGTTGA	mga-denovo-1-5p	UYJE01004741.1_21446	30	60	41	19	AACACTATCAAGTTCTTGGAT	FALSE	1H2	✔	✔	✔	✔	✔
ACTGGGGACTTTATATGTGTTGA	mga-denovo-1-5p	UYJE01004741.1_9130	23	47	28	19	AACACTATCAAGTTCTTGGAT	FALSE	1N1	✔	✔	✔	✔	✔
ACTGGGGACTTTATATGTGTTGA	mga-denovo-1-5p	UYJE01004741.1_9672	21	43	34	9	AACACTATCAAGTTCTTGGAT	FALSE	2N2	✔	✔	✔	✔	✔
ACTGGGGACTTTATATGTGTTGA	mga-denovo-1-5p	UYJE01004741.1_9942	11	23	10	13	AACACTATCAAGTTCTTGGA	FALSE	2R2	✔	✔	✔	✔	✔
ACTGGGGACTTTATATGTGTTGA	mga-denovo-1-5p	UYJE01006675.1_12747	23	47	28	19	AACACTATCAAGTTCTTGGAT	FALSE	1N1	✔	✔	✔	✔	✔
ACTGGGGACTTTATATGTGTTGA	mga-denovo-1-5p	UYJE01006675.1_13579	21	43	34	9	AACACTATCAAGTTCTTGGAT	FALSE	2N2	✔	✔	✔	✔	✔
ACTGGGGACTTTATATGTGTTGA	mga-denovo-1-5p	UYJE01006675.1_13999	11	23	10	13	AACACTATCAAGTTCTTGGA	FALSE	2R2	✔	✔	✔	✔	✔
ACTGGGGACTTTATATGTGTTGA	mga-denovo-1-5p	UYJE01006675.1_29927	81	160	141	19	AACACTATCAAGTTCTTGGAT	FALSE	1R1	✔	✔	✔	✔	✔
ACTGGGGACTTTATATGTGTTGA	mga-denovo-1-5p	UYJE01006675.1_29977	30	60	41	19	AACACTATCAAGTTCTTGGAT	FALSE	1H2	✔	✔	✔	✔	✔
ACTGGGGACTTTATATGTGTTGA	mga-denovo-1-5p	UYJE01007034.1_13446	23	47	28	19	AACACTATCAAGTTCTTGGAT	FALSE	1N1	✔	✔	✔	✔	✔
ACTGGGGACTTTATATGTGTTGA	mga-denovo-1-5p	UYJE01007034.1_14282	21	43	34	9	AACACTATCAAGTTCTTGGAT	FALSE	2N2	✔	✔	✔	✔	✔
ACTGGGGACTTTATATGTGTTGA	mga-denovo-1-5p	UYJE01007034.1_14742	11	23	10	13	AACACTATCAAGTTCTTGGA	FALSE	2R2	✔	✔	✔	✔	✔
ACTGGGGACTTTATATGTGTTGA	mga-denovo-1-5p	UYJE01007034.1_31410	81	160	141	19	AACACTATCAAGTTCTTGGAT	FALSE	1R1	✔	✔	✔	✔	✔
ACTGGGGACTTTATATGTGTTGA	mga-denovo-1-5p	UYJE01007034.1_31584	30	60	41	19	AACACTATCAAGTTCTTGGAT	FALSE	1H2	✔	✔	✔	✔	✔
TTTCGGACATTATTCCTGATAG	mga-denovo-2-5p	UYJE01001309.1_2413	980	1928	1834	94	GTCGGTAATAGTGTCCGAAA	FALSE	1N1	✔	✔	✔	✔	✔
TTTCGGACATTATTCCTGATAG	mga-denovo-2-5p	UYJE01001309.1_2681	620	1225	1193	32	GTCGGTAATAGTGTCCGAAA	FALSE	2N2	✔	✔	✔	✔	✔
TTTCGGACATTATTCCTGATAG	mga-denovo-2-5p	UYJE01001309.1_2705	680	1343	1320	23	GTCGGTAATAGTGTCCGAAA	FALSE	2R2	✔	✔	✔	✔	✔
TTTCGGACATTATTCCTGATAG	mga-denovo-2-5p	UYJE01001309.1_3865	840	1658	1645	13	GTCGGTAATAGTGTCCGAAA	FALSE	2H2	✔	✔	✔	✔	✔
TTTCGGACATTATTCCTGATAG	mga-denovo-2-5p	UYJE01001309.1_4273	650	1285	1224	61	GTCGGTAATAGTGTCCGAAA	FALSE	1H1	✔	✔	✔	✔	✔
TTTCGGACATTATTCCTGATAG	mga-denovo-2-5p	UYJE01001309.1_4907	670	1316	1286	30	GTCGGTAATAGTGTCCGAAA	FALSE	1N2	✔	✔	✔	✔	✔
TTTCGGACATTATTCCTGATAG	mga-denovo-2-5p	UYJE01001309.1_4925	730	1445	1409	36	GTCGGTAATAGTGTCCGAAA	FALSE	1R2	✔	✔	✔	✔	✔
TTTCGGACATTATTCCTGATAG	mga-denovo-2-5p	UYJE01001309.1_5871	1000	2103	1993	110	GTCGGTAATAGTGTCCGAAATA	FALSE	1H2	✔	✔	✔	✔	✔
TTTCGGACATTATTCCTGATAG	mga-denovo-2-5p	UYJE01001309.1_5959	1500	3057	2929	128	GTCGGTAATAGTGTCCGAAA	FALSE	1R1	✔	✔	✔	✔	✔
ACTTGCCAACGGGTTAGATAG	mga-denovo-3-3p	UYJE01002032.1_3987	640	1265	1241	24	TGTCTAACTTTTTGTGCATGC	FALSE	1N1	✔	✔	✔	✔	✔
ACTTGCCAACGGGTTAGATAG	mga-denovo-3-3p	UYJE01002032.1_4321	480	954	935	19	TGTCTAACTTTTTGTGCATGC	FALSE	2R2	✔	✔	✔	✔	✔
ACTTGCCAACGGGTTAGATAG	mga-denovo-3-3p	UYJE01002032.1_6365	330	652	642	10	TGTCTAACTTTTTGTGCATGC	FALSE	2H2	✔	✔	✔	✔	✔
ACTTGCCAACGGGTTAGATAG	mga-denovo-3-3p	UYJE01002032.1_6843	660	1297	1278	19	TGTCTAACTTTTTGTGCATGC	FALSE	1H1	✔	✔	✔	✔	✔
ACTTGCCAACGGGTTAGATAG	mga-denovo-3-3p	UYJE01002032.1_7815	390	770	756	14	TGTCTAACTTTTTGTGCATGC	FALSE	1N2	✔	✔	✔	✔	✔
ACTTGCCAACGGGTTAGATAG	mga-denovo-3-3p	UYJE01002032.1_7849	520	1034	1021	13	TGTCTAACTTTTTGTGCATGC	FALSE	1R2	✔	✔	✔	✔	✔
ACTTGCCAACGGGTTAGATAG	mga-denovo-3-3p	UYJE01002032.1_9399	650	1293	1268	25	TGTCTAACTTTTTGTGCATGC	FALSE	1H2	✔	✔	✔	✔	✔
ACTTGCCAACGGGTTAGATAG	mga-denovo-3-3p	UYJE01002032.1_9531	630	1238	1223	15	TGTCTAACTTTTTGTGCATGC	FALSE	1R1	✔	✔	✔	✔	✔
ACTTGCCAACGGGTTAGATAG	mga-denovo-3-3p	UYJE01003421.1_10923	330	652	642	10	TGTCTAACTTTTTGTGCATGC	FALSE	2H2	✔	✔	✔	✔	✔
ACTTGCCAACGGGTTAGATAG	mga-denovo-3-3p	UYJE01003421.1_11179	660	1297	1278	19	TGTCTAACTTTTTGTGCATGC	FALSE	1H1	✔	✔	✔	✔	✔
ACTTGCCAACGGGTTAGATAG	mga-denovo-3-3p	UYJE01003421.1_12915	390	770	756	14	TGTCTAACTTTTTGTGCATGC	FALSE	1N2	✔	✔	✔	✔	✔
ACTTGCCAACGGGTTAGATAG	mga-denovo-3-3p	UYJE01003421.1_13027	520	1034	1021	13	TGTCTAACTTTTTGTGCATGC	FALSE	1R2	✔	✔	✔	✔	✔
ACTTGCCAACGGGTTAGATAG	mga-denovo-3-3p	UYJE01003421.1_15403	650	1293	1268	25	TGTCTAACTTTTTGTGCATGC	FALSE	1H2	✔	✔	✔	✔	✔
ACTTGCCAACGGGTTAGATAG	mga-denovo-3-3p	UYJE01003421.1_15467	630	1238	1223	15	TGTCTAACTTTTTGTGCATGC	FALSE	1R1	✔	✔	✔	✔	✔
ACTTGCCAACGGGTTAGATAG	mga-denovo-3-3p	UYJE01003421.1_6605	640	1265	1241	24	TGTCTAACTTTTTGTGCATGC	FALSE	1N1	✔	✔	✔	✔	✔
ACTTGCCAACGGGTTAGATAG	mga-denovo-3-3p	UYJE01003421.1_7171	480	954	935	19	TGTCTAACTTTTTGTGCATGC	FALSE	2R2	✔	✔	✔	✔	✔
ATAGATAAATTGTATTCAGC	mga-denovo-4-5p	UYJE01002275.1_10382	270	545	530	15	TGAATGCAGTTTCTCTGGCAC	FALSE	1H2	✔	✔	✔	✔	✔
ATAGATAAATTGTATTCAGC	mga-denovo-4-5p	UYJE01002540.1_11664	280	568	553	15	TGAATGCAGTTTCTCTGGCAC	FALSE	1H2	✔	✔	✔	✔	✔
ATAGATAAATTGTATTCAGC	mga-denovo-4-5p	UYJE01003392.1_15326	280	568	553	15	TGAATGCAGTTTCTCTGGCAC	FALSE	1H2	✔	✔	✔	✔	✔
ATAGATAAATTGTATTCAGC	mga-denovo-4-5p	UYJE01010243.1_46409	280	568	553	15	TGAATGCAGTTTCTCTGGCAC	FALSE	1H2	✔	✔	✔	✔	✔
AGACTCAGCTACTTGACAAGG	mga-denovo-5-5p	UYJE01000100.1_292	13	26	16	10	CTTGCCATTTTAGCTTAATCTG	FALSE	2N2	✔	✔	✔	✔	✔
AGACTCAGCTACTTGACAAGG	mga-denovo-5-5p	UYJE01000100.1_458	19	39	25	14	CTTGCCATTTTAGCTTAATCTG	FALSE	1H1	✔	✔	✔	✔	✔
AGACTCAGCTACTTGACAAGG	mga-denovo-5-5p	UYJE01000100.1_522	14	29	19	10	CTTGCCATTTTAGCTTAATCTG	FALSE	1N2	✔	✔	✔	✔	✔
TGCCGTCTCCCTGACTTCCTT	mga-denovo-6-3p	UYJE01002879.1_11045	12	24	12	12	TGGTGGTCAGTGCAGCGGTAGA	TRUE	1R2	✔	✔	✔	✔	✔
TGCCGTCTCCCTGACTTCCTT	mga-denovo-6-3p	UYJE01002879.1_13199	13	26	17	9	TGGTGGTCAGTGCAGCGGTAGA	TRUE	1R1	✔	✔	✔	✔	✔
TGGTGGTCAGTGCAGCGGTAGA	mga-denovo-6-5p	UYJE01002879.1_10948	6.5	11	5	6	TGCCGTCTCCCTGACTTCCTTT	FALSE	1N2	✔	✔	✔	✔	✔
TGGTGGTCAGTGCAGCGGTAGA	mga-denovo-6-5p	UYJE01002879.1_13110	19	36	24	12	TGCCGTCTCCCTGACTTCCTT	TRUE	1H2	✔	✔	✔	✔	✔
TGGTGGTCAGTGCAGCGGTAGA	mga-denovo-6-5p	UYJE01002879.1_5590	25	49	31	18	TGCCGTCTCCCTGACTTCCTT	TRUE	1N1	✔	✔	✔	✔	✔
TGGTGGTCAGTGCAGCGGTAGA	mga-denovo-6-5p	UYJE01002879.1_5948	14	27	20	7	TGCCGTCTCCCTGACTTCCTT	TRUE	2N2	✔	✔	✔	✔	✔
TGGTGGTCAGTGCAGCGGTAGA	mga-denovo-6-5p	UYJE01002879.1_9566	21	41	25	16	TGCCGTCTCCCTGACTTCCTT	TRUE	1H1	✔	✔	✔	✔	✔
TAGCACTAGTGTATATTTAAAA	mga-denovo-7-3p	UYJE01000811.1_2459	10	23	15	8	TTGAATATGCACAAAGTGCAAA	FALSE	2H2	✔	✔	✔	✔	✔
TAGCACTAGTGTATATTTAAAA	mga-denovo-7-3p	UYJE01000811.1_2725	7.9	17	11	6	TTTGAATATGCACAAAGTGCAA	FALSE	1H1	✔	✔	✔	✔	✔
TAGCACTAGTGTATATTTAAAA	mga-denovo-7-3p	UYJE01000811.1_3855	27	55	48	7	TTTGAATATGCACAAAGTGCAA	FALSE	1R1	✔	✔	✔	✔	✔
TAGCACTAGTGTATATTTAAAA	mga-denovo-7-3p	UYJE01003498.1_11122	10	23	15	8	TTGAATATGCACAAAGTGCAAA	FALSE	2H2	✔	✔	✔	✔	✔
TAGCACTAGTGTATATTTAAAA	mga-denovo-7-3p	UYJE01003498.1_11452	7.9	17	11	6	TTTGAATATGCACAAAGTGCAA	FALSE	1H1	✔	✔	✔	✔	✔
TAGCACTAGTGTATATTTAAAA	mga-denovo-7-3p	UYJE01003498.1_15850	27	55	48	7	TTTGAATATGCACAAAGTGCAA	FALSE	1R1	✔	✔	✔	✔	✔
TAGCACTAGTGTATATTTAAAA	mga-denovo-7-3p	UYJE01003793.1_12359	9.7	21	13	8	TTGAATATGCACAAAGTGCAAA	FALSE	2H2	✔	✔	✔	✔	✔
TAGCACTAGTGTATATTTAAAA	mga-denovo-7-3p	UYJE01003793.1_12661	7.6	17	11	6	TTTGAATATGCACAAAGTGCAA	FALSE	1H1	✔	✔	✔	✔	✔
TAGCACTAGTGTATATTTAAAA	mga-denovo-7-3p	UYJE01003793.1_17479	27	55	48	7	TTTGAATATGCACAAAGTGCAA	FALSE	1R1	✔	✔	✔	✔	✔
TAGCACTAGTGTATATTTAAAA	mga-denovo-7-3p	UYJE01006661.1_21135	10	23	15	8	TTGAATATGCACAAAGTGCAAA	FALSE	2H2	✔	✔	✔	✔	✔
TAGCACTAGTGTATATTTAAAA	mga-denovo-7-3p	UYJE01006661.1_21685	7.9	17	11	6	TTTGAATATGCACAAAGTGCAA	FALSE	1H1	✔	✔	✔	✔	✔
TAGCACTAGTGTATATTTAAAA	mga-denovo-7-3p	UYJE01006661.1_29855	27	55	48	7	TTTGAATATGCACAAAGTGCAA	FALSE	1R1	✔	✔	✔	✔	✔
TAGCACTAGTGTATATTTAAAA	mga-denovo-7-3p	UYJE01008463.1_26852	10	23	15	8	TTGAATATGCACAAAGTGCAAA	FALSE	2H2	✔	✔	✔	✔	✔
TAGCACTAGTGTATATTTAAAA	mga-denovo-7-3p	UYJE01008463.1_27590	7.9	17	11	6	TTTGAATATGCACAAAGTGCAA	FALSE	1H1	✔	✔	✔	✔	✔
TAGCACTAGTGTATATTTAAAA	mga-denovo-7-3p	UYJE01008463.1_37936	27	55	48	7	TTTGAATATGCACAAAGTGCAA	FALSE	1R1	✔	✔	✔	✔	✔
TCGCTGAGACAAAGAATTCTAC	mga-denovo-8-5p	UYJE01005027.1_10228	42000	83294	80961	2333	AGAGTCCTCTGGCTCGACGAGA	FALSE	2N2	✔	✔	✔	✔	✔
TCGCTGAGACAAAGAATTCTAC	mga-denovo-8-5p	UYJE01005027.1_10514	25000	50823	48780	2043	AGAGTCCTCTGGCTCGACGAGA	FALSE	2R2	✔	✔	✔	✔	✔
TCGCTGAGACAAAGAATTCTAC	mga-denovo-8-5p	UYJE01005027.1_15934	24000	48713	47196	1517	AGAGTCCTCTGGCTCGACGAGA	FALSE	2H2	✔	✔	✔	✔	✔
TCGCTGAGACAAAGAATTCTAC	mga-denovo-8-5p	UYJE01005027.1_16400	57000	113526	110276	3250	AGAGTCCTCTGGCTCGACGAGA	FALSE	1H1	✔	✔	✔	✔	✔
TCGCTGAGACAAAGAATTCTAC	mga-denovo-8-5p	UYJE01005027.1_19106	43000	84619	81610	3009	AGAGTCCTCTGGCTCGACGAGA	FALSE	1R2	✔	✔	✔	✔	✔
TCGCTGAGACAAAGAATTCTAC	mga-denovo-8-5p	UYJE01005027.1_19198	45000	89234	86412	2822	AGAGTCCTCTGGCTCGACGAGA	FALSE	1N2	✔	✔	✔	✔	✔
TCGCTGAGACAAAGAATTCTAC	mga-denovo-8-5p	UYJE01005027.1_22626	64000	126287	123690	2597	AGAGTCCTCTGGCTCGACGAGA	FALSE	1R1	✔	✔	✔	✔	✔
TCGCTGAGACAAAGAATTCTAC	mga-denovo-8-5p	UYJE01005027.1_22802	65000	128368	125139	3229	AGAGTCCTCTGGCTCGACGAGA	FALSE	1H2	✔	✔	✔	✔	✔
TCGCTGAGACAAAGAATTCTAC	mga-denovo-8-5p	UYJE01005027.1_9602	82000	162792	159034	3758	AGAGTCCTCTGGCTCGACGAGA	FALSE	1N1	✔	✔	✔	✔	✔
TTGGTTACTATTTATGTGTTGC	mga-denovo-9-5p	UYJE01009047.1_41068	16	35	21	14	TTACACTTTATAGTGACTGAAC	FALSE	1H2	✔	✔	✔	✔	✔
CAGTGCCGATGGGAATGGCATA	mga-nov-10	UYJE01000044.1_197	10000	20267	12826	7440	TGCCATTTTTATCAGTCACTG	FALSE	1R2	❌	✔	✔	❌	❌
AAATGCCATGAGGTGAAACAG	mga-nov-18	UYJE01002582.1_11829	170	351	245	106	TGTTTTAGCTCTTGTGCATTG	FALSE	1H2	❌	✔	✔	❌	❌
AAATGCCATGAGGTGAAACAG	mga-nov-18	UYJE01002582.1_11832	170	351	245	106	TGTTTTAGCTCTTGTGCATTG	FALSE	1H2	❌	✔	✔	❌	❌
AAATGCCATGAGGTGAAACAG	mga-nov-18	UYJE01002582.1_11983	210	413	289	124	TGTTTTAGCTCTTGTGCATTG	FALSE	1R1	❌	✔	✔	❌	❌
AAATGCCATGAGGTGAAACAG	mga-nov-18	UYJE01002582.1_11986	200	413	289	124	TGTTTTAGCTCTTGTGCATTG	FALSE	1R1	❌	✔	✔	❌	❌
AAATGCCATGAGGTGAAACAG	mga-nov-18	UYJE01002582.1_5037	240	484	383	101	TGTTTTAGCTCTTGTGCATTG	FALSE	1N1	❌	✔	✔	❌	❌
AAATGCCATGAGGTGAAACAG	mga-nov-18	UYJE01002582.1_5040	240	484	383	101	TGTTTTAGCTCTTGTGCATTG	FALSE	1N1	✔	✔	✔	❌	❌
AAATGCCATGAGGTGAAACAG	mga-nov-18	UYJE01002582.1_5327	220	437	363	74	TGTTTTAGCTCTTGTGCATTG	FALSE	2N2	❌	✔	✔	❌	❌
AAATGCCATGAGGTGAAACAG	mga-nov-18	UYJE01002582.1_5330	220	437	363	74	TGTTTTAGCTCTTGTGCATTG	FALSE	2N2	❌	✔	✔	❌	❌
AAATGCCATGAGGTGAAACAG	mga-nov-18	UYJE01002582.1_5351	100	207	147	60	TGTTTTAGCTCTTGTGCATTG	FALSE	2R2	❌	✔	✔	❌	❌
AAATGCCATGAGGTGAAACAG	mga-nov-18	UYJE01002582.1_5354	100	207	147	60	TGTTTTAGCTCTTGTGCATTG	FALSE	2R2	❌	✔	✔	❌	❌
AAATGCCATGAGGTGAAACAG	mga-nov-18	UYJE01002582.1_7999	170	336	285	51	TGTTTTAGCTCTTGTGCATTG	FALSE	2H2	❌	✔	✔	❌	❌
AAATGCCATGAGGTGAAACAG	mga-nov-18	UYJE01002582.1_8002	170	336	285	51	TGTTTTAGCTCTTGTGCATTG	FALSE	2H2	❌	✔	✔	❌	❌
AAATGCCATGAGGTGAAACAG	mga-nov-18	UYJE01002582.1_9883	150	314	228	86	TGTTTTAGCTCTTGTGCATTG	FALSE	1N2	❌	✔	✔	❌	❌
AAATGCCATGAGGTGAAACAG	mga-nov-18	UYJE01002582.1_9888	150	314	228	86	TGTTTTAGCTCTTGTGCATTG	FALSE	1N2	❌	✔	✔	❌	❌
AAATGCCATGAGGTGAAACAG	mga-nov-18	UYJE01002582.1_9893	130	257	137	120	TGTTTTAGCTCTTGTGCATTG	FALSE	1R2	❌	✔	✔	❌	❌
AAATGCCATGAGGTGAAACAG	mga-nov-18	UYJE01002582.1_9900	130	257	137	120	TGTTTTAGCTCTTGTGCATTG	FALSE	1R2	❌	✔	✔	❌	❌
AAATGCCATGAGGTGAAACAG	mga-nov-18	UYJE01003312.1_10645	170	336	285	51	TGTTTTAGCTCTTGTGCATTG	FALSE	2H2	❌	✔	✔	❌	❌
AAATGCCATGAGGTGAAACAG	mga-nov-18	UYJE01003312.1_12579	150	314	228	86	TGTTTTAGCTCTTGTGCATTG	FALSE	1N2	❌	✔	✔	❌	❌
AAATGCCATGAGGTGAAACAG	mga-nov-18	UYJE01003312.1_12735	130	257	137	120	TGTTTTAGCTCTTGTGCATTG	FALSE	1R2	❌	✔	✔	❌	❌
AAATGCCATGAGGTGAAACAG	mga-nov-18	UYJE01003312.1_15015	170	351	245	106	TGTTTTAGCTCTTGTGCATTG	FALSE	1H2	❌	✔	✔	❌	❌
AAATGCCATGAGGTGAAACAG	mga-nov-18	UYJE01003312.1_15127	210	413	289	124	TGTTTTAGCTCTTGTGCATTG	FALSE	1R1	❌	✔	✔	❌	❌
AAATGCCATGAGGTGAAACAG	mga-nov-18	UYJE01003312.1_6445	240	484	383	101	TGTTTTAGCTCTTGTGCATTG	FALSE	1N1	❌	✔	✔	❌	❌
AAATGCCATGAGGTGAAACAG	mga-nov-18	UYJE01003312.1_6845	220	437	363	74	TGTTTTAGCTCTTGTGCATTG	FALSE	2N2	❌	✔	✔	❌	❌
AAATGCCATGAGGTGAAACAG	mga-nov-18	UYJE01003312.1_6999	100	207	147	60	TGTTTTAGCTCTTGTGCATTG	FALSE	2R2	❌	✔	✔	❌	❌
AAATGCCATGAGGTGAAACAG	mga-nov-18	UYJE01006281.1_12082	240	484	383	101	TGTTTTAGCTCTTGTGCATTG	FALSE	1N1	❌	✔	✔	❌	❌
AAATGCCATGAGGTGAAACAG	mga-nov-18	UYJE01006281.1_12888	220	437	363	74	TGTTTTAGCTCTTGTGCATTG	FALSE	2N2	❌	✔	✔	❌	❌
AAATGCCATGAGGTGAAACAG	mga-nov-18	UYJE01006281.1_13322	100	207	147	60	TGTTTTAGCTCTTGTGCATTG	FALSE	2R2	❌	✔	✔	❌	❌
AAATGCCATGAGGTGAAACAG	mga-nov-18	UYJE01006281.1_20088	170	336	285	51	TGTTTTAGCTCTTGTGCATTG	FALSE	2H2	❌	✔	✔	❌	❌
AAATGCCATGAGGTGAAACAG	mga-nov-18	UYJE01006281.1_24160	130	257	137	120	TGTTTTAGCTCTTGTGCATTG	FALSE	1R2	❌	✔	✔	❌	❌
AAATGCCATGAGGTGAAACAG	mga-nov-18	UYJE01006281.1_24194	150	314	228	86	TGTTTTAGCTCTTGTGCATTG	FALSE	1N2	❌	✔	✔	❌	❌
AAATGCCATGAGGTGAAACAG	mga-nov-18	UYJE01006281.1_28348	210	413	289	124	TGTTTTAGCTCTTGTGCATTG	FALSE	1R1	❌	✔	✔	❌	❌
AAATGCCATGAGGTGAAACAG	mga-nov-18	UYJE01006281.1_28446	170	351	245	106	TGTTTTAGCTCTTGTGCATTG	FALSE	1H2	❌	✔	✔	❌	❌
AAATGCCATGAGGTGAAACAG	mga-nov-18	UYJE01008852.1_16900	240	484	383	101	TGTTTTAGCTCTTGTGCATTG	FALSE	1N1	❌	✔	✔	❌	❌
AAATGCCATGAGGTGAAACAG	mga-nov-18	UYJE01008852.1_18338	220	437	363	74	TGTTTTAGCTCTTGTGCATTG	FALSE	2N2	❌	✔	✔	❌	❌
AAATGCCATGAGGTGAAACAG	mga-nov-18	UYJE01008852.1_18736	100	207	147	60	TGTTTTAGCTCTTGTGCATTG	FALSE	2R2	❌	✔	✔	❌	❌
AAATGCCATGAGGTGAAACAG	mga-nov-18	UYJE01008852.1_28302	170	336	285	51	TGTTTTAGCTCTTGTGCATTG	FALSE	2H2	❌	✔	✔	❌	❌
AAATGCCATGAGGTGAAACAG	mga-nov-18	UYJE01008852.1_33800	130	257	137	120	TGTTTTAGCTCTTGTGCATTG	FALSE	1R2	❌	✔	✔	❌	❌
AAATGCCATGAGGTGAAACAG	mga-nov-18	UYJE01008852.1_34002	150	314	228	86	TGTTTTAGCTCTTGTGCATTG	FALSE	1N2	❌	✔	✔	❌	❌
AAATGCCATGAGGTGAAACAG	mga-nov-18	UYJE01008852.1_39844	210	413	289	124	TGTTTTAGCTCTTGTGCATTG	FALSE	1R1	❌	✔	✔	❌	❌
AAATGCCATGAGGTGAAACAG	mga-nov-18	UYJE01008852.1_40156	170	351	245	106	TGTTTTAGCTCTTGTGCATTG	FALSE	1H2	❌	✔	✔	❌	❌
TAACACTTTATACTGACCGAAC	mga-nov-20	UYJE01005833.1_11232	380	756	308	448	TTGGTCACTATTTATGTGTTGC	FALSE	1N1	—	✔	✔	1nt	❌
TAACACTTTATACTGACCGAAC	mga-nov-20	UYJE01005833.1_11890	250	495	309	186	TTGGTCACTATTTATGTGTTGC	FALSE	2N2	—	✔	✔	1nt	❌
TAACACTTTATACTGACCGAAC	mga-nov-20	UYJE01005833.1_19104	340	687	360	327	TTGGTCACTATTTATGTGTTGCG	FALSE	1H1	—	✔	✔	1nt	❌
TAACACTTTATACTGACCGAAC	mga-nov-20	UYJE01005833.1_22332	260	526	239	287	TTGGTCACTATTTATGTGTTGC	FALSE	1R2	—	✔	✔	1nt	❌
TAACACTTTATACTGACCGAAC	mga-nov-20	UYJE01005833.1_22424	320	635	314	321	TTGGTCACTATTTATGTGTTGC	FALSE	1N2	—	✔	✔	1nt	❌
TAACACTTTATACTGACCGAAC	mga-nov-20	UYJE01005833.1_26510	330	650	290	360	TTGGTCACTATTTATGTGTTGC	FALSE	1H2	—	✔	✔	1nt	❌
GAACTCTGAGGAAACACAACTC	mga-nov-21	UYJE01005398.1_10321	90	174	167	7	AGTTGTATTTCCCAAGGGTTG	FALSE	1N1	✔	✔	✔	1nt	—
GAACTCTGAGGAAACACAACTC	mga-nov-21	UYJE01005398.1_17593	200	390	356	34	AGTTGTATTTCCCAAGGGTTG	FALSE	1H1	✔	✔	✔	1nt	—
GAACTCTGAGGAAACACAACTC	mga-nov-21	UYJE01005398.1_24353	170	343	326	17	AGTTGTATTTCCCAAGGGTTG	FALSE	1R1	✔	✔	✔	1nt	—
GAACTCTGAGGAAACACAACTC	mga-nov-21	UYJE01005398.1_24499	97	189	170	19	AGTTGTATTTCCCAAGGGTTG	FALSE	1H2	✔	✔	✔	1nt	—
AGCCTTATCTTCCAATCACTGC	mga-nov-22	UYJE01000044.1_155	64	125	118	7	AGCGACTGACGGATAGGGCACA	FALSE	2N2	❌	✔	✔	✔	❌
AGCCTTATCTTCCAATCACTGC	mga-nov-22	UYJE01000044.1_241	79	154	144	10	AGCGACTGACGGATAGGGCACA	FALSE	1R2	❌	✔	✔	✔	❌
AGCCTTATCTTCCAATCACTGC	mga-nov-22	UYJE01000044.1_249	61	119	111	8	AGCGACTGACGGATAGGGCACA	FALSE	1N2	❌	✔	✔	✔	❌
AGCCTTATCTTCCAATCACTGC	mga-nov-22	UYJE01000044.1_271	81	157	138	19	AGCGACTGACGGATAGGGCACA	FALSE	1H2	❌	✔	✔	✔	❌
AGCCTTATCTTCCAATCACTGC	mga-nov-22	UYJE01000044.1_315	64	125	117	8	AGCGACTGACGGATAGGGCACA	FALSE	1R1	❌	✔	✔	✔	❌
TAATGCAATTTTATTTGGTAA	mga-nov-24	UYJE01005503.1_21032	150	303	121	182	TTATCCAAATATCTCTGCATTA	FALSE	1R2	❌	✔	✔	1nt	❌
TAATGCAATTTTATTTGGTAA	mga-nov-24	UYJE01005503.1_21144	100	212	82	130	TTATCCAAATATCTCTGCATTA	FALSE	1N2	❌	✔	✔	1nt	❌
TAATGCAATTTTATTTGGTAA	mga-nov-24	UYJE01005503.1_24888	160	319	131	187	TATCCAAATATCTCTGCATTA	FALSE	1R1	❌	✔	✔	1nt	❌
TAATGCAATTTTATTTGGTAA	mga-nov-24	UYJE01005503.1_25042	120	255	122	133	TATCCAAATATCTCTGCATTA	FALSE	1H2	❌	✔	✔	1nt	❌
TTTGCTTTGAGCTAAGTTCAT	mga-nov-25	UYJE01009839.1_44501	390	781	771	10	TGGATTTAGCTCTTTGTCTAAG	FALSE	1H2	✔	✔	✔	1nt	—
CAAAAGTTATAAGTCAATATA	mga-nov-26	UYJE01006914.1_13254	49	99	35	64	TATACTGACTTCAAACTTTTG	FALSE	1N1	—	✔	✔	❌	❌
TAAATGCTACCCCAACACTGGGA	mga-nov-27	UYJE01007946.1_15255	90	177	100	77	TCAGTGTTGTAGTAGTGTTACA	TRUE	1N1	❌	✔	✔	✔	❌
TAAATGCTACCCCAACACTGGGA	mga-nov-27	UYJE01007946.1_16381	9.1	18	11	7	TCAGTGTTGTAGTAGTGTTACA	TRUE	2N2	❌	✔	✔	✔	❌
TAAATGCTACCCCAACACTGGGA	mga-nov-27	UYJE01007946.1_16837	11	22	12	10	TCAGTGTTGTAGTAGTGTTACA	TRUE	2R2	❌	✔	✔	✔	❌
TAAATGCTACCCCAACACTGGGA	mga-nov-27	UYJE01007946.1_25329	17	35	20	15	TCAGTGTTGTAGTAGTGTTACA	TRUE	2H2	❌	✔	✔	✔	❌
TAAATGCTACCCCAACACTGGGA	mga-nov-27	UYJE01007946.1_35683	52	103	58	45	TCAGTGTTGTAGTAGTGTTACA	TRUE	1R1	❌	✔	✔	✔	❌
TAAATGCTACCCCAACACTGGGA	mga-nov-27	UYJE01007946.1_36033	25	51	25	26	TCAGTGTTGTAGTAGTGTTACA	TRUE	1H2	❌	✔	✔	✔	❌
TAAATGCTACCCCAACACTGGGA	mga-nov-27	UYJE01008113.1_15566	90	177	100	77	TCAGTGTTGTAGTAGTGTTACA	TRUE	1N1	❌	✔	✔	✔	❌
TAAATGCTACCCCAACACTGGGA	mga-nov-27	UYJE01008113.1_16760	9.1	18	11	7	TCAGTGTTGTAGTAGTGTTACA	TRUE	2N2	❌	✔	✔	✔	❌
TAAATGCTACCCCAACACTGGGA	mga-nov-27	UYJE01008113.1_17208	11	22	12	10	TCAGTGTTGTAGTAGTGTTACA	TRUE	2R2	❌	✔	✔	✔	❌
TAAATGCTACCCCAACACTGGGA	mga-nov-27	UYJE01008113.1_25846	17	35	20	15	TCAGTGTTGTAGTAGTGTTACA	TRUE	2H2	❌	✔	✔	✔	❌
TAAATGCTACCCCAACACTGGGA	mga-nov-27	UYJE01008113.1_36572	52	103	58	45	TCAGTGTTGTAGTAGTGTTACA	TRUE	1R1	❌	✔	✔	✔	❌
AACTGTACTTGCAAGGTTTAAGG	mga-nov-28	UYJE01001949.1_4082	21	42	26	16	TTAACTTTGTGATTATTTTCGG	TRUE	2N2	✔	✔	✔	1nt	—
AACTGTACTTGCAAGGTTTAAGG	mga-nov-28	UYJE01001949.1_4138	11	22	16	6	TTAACTTTGTGATTATTTTCGG	TRUE	2R2	✔	✔	✔	1nt	—
AACTGTACTTGCAAGGTTTAAGG	mga-nov-28	UYJE01001949.1_6050	15	30	23	7	TTAACTTTGTGATTATTTTCGG	TRUE	2H2	✔	✔	✔	1nt	—
AACTGTACTTGCAAGGTTTAAGG	mga-nov-28	UYJE01001949.1_6522	46	90	63	27	TTAACTTTGTGATTATTTTCGG	TRUE	1H1	✔	✔	✔	1nt	—
AACTGTACTTGCAAGGTTTAAGG	mga-nov-28	UYJE01001949.1_8928	24	47	35	12	TTAACTTTGTGATTATTTTCGG	TRUE	1H2	❌	✔	✔	✔	—
AACTGTACTTGCAAGGTTTAAGG	mga-nov-28	UYJE01001949.1_9122	35	68	49	19	TTAACTTTGTGATTATTTTCGG	TRUE	1R1	✔	✔	✔	1nt	—
TCCGGGAAGTGATCAGGTTTTGA	mga-nov-29	UYJE01001690.1_6496	29	57	31	26	TAAAACTGATCATTGACTGGG	FALSE	1R2	✔	✔	✔	1nt	—
TCCGGGAAGTGATCAGGTTTTGA	mga-nov-29	UYJE01001690.1_7877	28	55	27	28	TAAAACTGATCATTGACTGGG	FALSE	1R1	✔	✔	✔	1nt	—
TCCGGGAAGTGATCAGGTTTTGA	mga-nov-29	UYJE01004218.1_16150	29	57	31	26	TAAAACTGATCATTGACTGGG	FALSE	1R2	✔	✔	✔	1nt	—
TCCGGGAAGTGATCAGGTTTTGA	mga-nov-29	UYJE01004218.1_19233	28	55	27	28	TAAAACTGATCATTGACTGGG	FALSE	1R1	✔	✔	✔	1nt	—
TCCGGGAAGTGATCAGGTTTTGA	mga-nov-29	UYJE01005898.1_22564	29	57	31	26	TAAAACTGATCATTGACTGGG	FALSE	1R2	✔	✔	✔	1nt	—
TCCGGGAAGTGATCAGGTTTTGA	mga-nov-29	UYJE01005898.1_26573	28	55	27	28	TAAAACTGATCATTGACTGGG	FALSE	1R1	✔	✔	✔	1nt	—
TCCGGGAAGTGATCAGGTTTTGA	mga-nov-29	UYJE01005985.1_22962	29	57	31	26	TAAAACTGATCATTGACTGGG	FALSE	1R2	✔	✔	✔	1nt	—
TCCGGGAAGTGATCAGGTTTTGA	mga-nov-29	UYJE01005985.1_27095	28	55	27	28	TAAAACTGATCATTGACTGGG	FALSE	1R1	✔	✔	✔	1nt	—
TCCGGGAAGTGATCAGGTTTTGA	mga-nov-29	UYJE01001690.1_3445	29	56	24	32	TAAAACTGATCATTGACTGGGC	TRUE	2N2	✔	✔	✔	1nt	—
TCCGGGAAGTGATCAGGTTTTGA	mga-nov-29	UYJE01001690.1_5611	28	55	27	28	TAAAACTGATCATTGACTGGGC	TRUE	1H1	✔	✔	✔	1nt	—
TCCGGGAAGTGATCAGGTTTTGA	mga-nov-29	UYJE01004218.1_13412	21	41	21	20	TAAAACTGATCATTGACTGGGC	TRUE	2H2	✔	✔	✔	1nt	—
TCCGGGAAGTGATCAGGTTTTGA	mga-nov-29	UYJE01004218.1_13969	28	55	27	28	TAAAACTGATCATTGACTGGGC	TRUE	1H1	✔	✔	✔	1nt	—
TCCGGGAAGTGATCAGGTTTTGA	mga-nov-29	UYJE01004218.1_8705	29	56	24	32	TAAAACTGATCATTGACTGGGC	TRUE	2N2	✔	✔	✔	1nt	—
TCCGGGAAGTGATCAGGTTTTGA	mga-nov-29	UYJE01005898.1_12007	29	56	24	32	TAAAACTGATCATTGACTGGGC	TRUE	2N2	✔	✔	✔	1nt	—
TCCGGGAAGTGATCAGGTTTTGA	mga-nov-29	UYJE01005898.1_19301	28	55	27	28	TAAAACTGATCATTGACTGGGC	TRUE	1H1	✔	✔	✔	1nt	—
TCCGGGAAGTGATCAGGTTTTGA	mga-nov-29	UYJE01005985.1_12249	29	56	24	32	TAAAACTGATCATTGACTGGGC	TRUE	2N2	✔	✔	✔	1nt	—
TCCGGGAAGTGATCAGGTTTTGA	mga-nov-29	UYJE01005985.1_19144	21	41	21	20	TAAAACTGATCATTGACTGGGC	TRUE	2H2	✔	✔	✔	1nt	—
TCCGGGAAGTGATCAGGTTTTGA	mga-nov-29	UYJE01005985.1_19695	28	55	27	28	TAAAACTGATCATTGACTGGGC	TRUE	1H1	✔	✔	✔	1nt	—
ACAAACTCTGTTCGGGTACACG	mga-nov-3	UYJE01007891.1_15117	20000	39567	24589	14978	TGTACCAGATCAGAGTTGTTA	FALSE	1N1	—	✔	✔	✔	❌
ACAAACTCTGTTCGGGTACACG	mga-nov-3	UYJE01007891.1_16237	12000	23728	15310	8418	TGTACCAGATCAGAGTTGTTA	FALSE	2N2	—	✔	✔	✔	❌
ACAAACTCTGTTCGGGTACACG	mga-nov-3	UYJE01007891.1_16681	10000	19858	14029	5829	TGTACCAGATCAGAGTTGTTA	FALSE	2R2	—	✔	✔	✔	❌
ACAAACTCTGTTCGGGTACACG	mga-nov-3	UYJE01007891.1_25107	11000	22219	16256	5963	TGTACCAGATCAGAGTTGTTA	FALSE	2H2	—	✔	✔	✔	❌
ACAAACTCTGTTCGGGTACACG	mga-nov-3	UYJE01007891.1_25741	20000	39629	24895	14734	TGTACCAGATCAGAGTTGTTA	FALSE	1H1	—	✔	✔	✔	❌
ACAAACTCTGTTCGGGTACACG	mga-nov-3	UYJE01007891.1_30063	17000	34088	23152	10936	TGTACCAGATCAGAGTTGTTA	FALSE	1R2	—	✔	✔	✔	❌
ACAAACTCTGTTCGGGTACACG	mga-nov-3	UYJE01007891.1_30369	16000	31558	22749	8809	TGTACCAGATCAGAGTTGTTA	FALSE	1N2	—	✔	✔	✔	❌
ACAAACTCTGTTCGGGTACACG	mga-nov-3	UYJE01007891.1_35401	23000	46839	34254	12585	TGTACCAGATCAGAGTTGTTA	FALSE	1R1	—	✔	✔	✔	❌
ACAAACTCTGTTCGGGTACACG	mga-nov-3	UYJE01007891.1_35761	22000	44126	29802	14324	TGTACCAGATCAGAGTTGTTA	FALSE	1H2	—	✔	✔	✔	❌
TAAAACTGATCATTGACTGGGC	mga-nov-30	UYJE01001690.1_3189	72	140	119	21	TCCGGGAAGTGATCAGGTTTTGA	TRUE	1N1	✔	✔	✔	1nt	—
TAAAACTGATCATTGACTGGGC	mga-nov-30	UYJE01001690.1_5136	21	41	20	21	TCCGGGAAGTGATCAGGTTTTGA	TRUE	2H2	✔	✔	✔	1nt	—
TAAAACTGATCATTGACTGGGC	mga-nov-30	UYJE01001690.1_6416	22	43	28	15	TCCGGGAAGTGATCAGGTTTTGA	TRUE	1N2	✔	✔	✔	1nt	—
TAAAACTGATCATTGACTGGGC	mga-nov-30	UYJE01004218.1_16156	22	43	28	15	TCCGGGAAGTGATCAGGTTTTGA	TRUE	1N2	✔	✔	✔	1nt	—
TAAAACTGATCATTGACTGGGC	mga-nov-30	UYJE01004218.1_8199	72	140	119	21	TCCGGGAAGTGATCAGGTTTTGA	TRUE	1N1	✔	✔	✔	1nt	—
TAAAACTGATCATTGACTGGGC	mga-nov-30	UYJE01005898.1_11335	72	140	119	21	TCCGGGAAGTGATCAGGTTTTGA	TRUE	1N1	✔	✔	✔	1nt	—
TAAAACTGATCATTGACTGGGC	mga-nov-30	UYJE01005898.1_18766	21	41	20	21	TCCGGGAAGTGATCAGGTTTTGA	TRUE	2H2	✔	✔	✔	1nt	—
TAAAACTGATCATTGACTGGGC	mga-nov-30	UYJE01005898.1_22654	22	43	28	15	TCCGGGAAGTGATCAGGTTTTGA	TRUE	1N2	✔	✔	✔	1nt	—
TAAAACTGATCATTGACTGGGC	mga-nov-30	UYJE01005985.1_11519	72	140	119	21	TCCGGGAAGTGATCAGGTTTTGA	TRUE	1N1	✔	✔	✔	1nt	—
TAAAACTGATCATTGACTGGGC	mga-nov-30	UYJE01005985.1_23082	22	43	28	15	TCCGGGAAGTGATCAGGTTTTGA	TRUE	1N2	✔	✔	✔	1nt	—
AAAACGGATCATTGCCTGGG	mga-nov-31	UYJE01005995.1_19174	24	46	40	6	CTGGGAAATGGTCATGTTTTGA	FALSE	2H2	❌	✔	✔	✔	❌
AAAACGGATCATTGCCTGGG	mga-nov-31	UYJE01005995.1_27162	55	107	88	19	CTGGGAAATGGTCATGTTTTGA	FALSE	1R1	❌	✔	✔	✔	❌
TCAGTGTTGTAGTAGTGTTACA	mga-nov-32	UYJE01007946.1_25982	23	47	27	20	TAAATGCTACCCCAACACTGGGA	TRUE	1H1	❌	✔	✔	❌	❌
TCAGTGTTGTAGTAGTGTTACA	mga-nov-32	UYJE01007946.1_30300	26	53	34	19	TAAATGCTACCCCAACACTGGGA	TRUE	1R2	❌	✔	✔	❌	❌
TCAGTGTTGTAGTAGTGTTACA	mga-nov-32	UYJE01007946.1_30626	27	55	29	26	TAAATGCTACCCCAACACTGGGA	TRUE	1N2	❌	✔	✔	❌	❌
TCAGTGTTGTAGTAGTGTTACA	mga-nov-32	UYJE01008113.1_26619	24	47	27	20	TAAATGCTACCCCAACACTGGGA	TRUE	1H1	❌	✔	✔	❌	❌
TCAGTGTTGTAGTAGTGTTACA	mga-nov-32	UYJE01008113.1_31049	27	53	34	19	TAAATGCTACCCCAACACTGGGA	TRUE	1R2	❌	✔	✔	❌	❌
TCAGTGTTGTAGTAGTGTTACA	mga-nov-32	UYJE01008113.1_31347	28	55	29	26	TAAATGCTACCCCAACACTGGGA	TRUE	1N2	❌	✔	✔	❌	❌
TCAGTGTTGTAGTAGTGTTACA	mga-nov-32	UYJE01008113.1_36872	25	51	26	25	TAAATGCTACCCCAACACTGGGA	TRUE	1H2	❌	✔	✔	❌	❌
TCTGGTTTTAACATATGGATACA	mga-nov-33	UYJE01005013.1_22391	44	91	77	14	TCTCCATGTGATAACTACCTG	FALSE	1R1	❌	✔	✔	❌	❌
TCTGGTTTTAACATATGGATACA	mga-nov-33	UYJE01005013.1_22401	37	75	61	14	TCTCCATGTGATAACTACCTG	FALSE	1R1	❌	✔	✔	❌	❌
TCTGGTTTTAACATATGGATACA	mga-nov-33	UYJE01005013.1_9501	18	39	33	6	TCTCCATGTGATAACTACCTG	FALSE	1N1	❌	✔	✔	❌	❌
CCTAGATACTTTTAGCTTTGA	mga-nov-34	UYJE01005523.1_21120	15	34	28	6	AAATCTGAAAGTAGCTTTGGG	FALSE	1R2	✔	✔	✔	1nt	—
CCTAGATACTTTTAGCTTTGA	mga-nov-34	UYJE01005523.1_21230	17	39	20	19	TAAATCTGAAAGTAGCTTTGGG	FALSE	1N2	✔	✔	✔	1nt	—
CCTAGATACTTTTAGCTTTGA	mga-nov-34	UYJE01005523.1_24980	34	71	64	7	TAAATCTGAAAGTAGCTTTGGG	FALSE	1R1	✔	✔	✔	1nt	—
CCTAGATACTTTTAGCTTTGA	mga-nov-34	UYJE01005523.1_25146	16	36	18	18	TAAATCTGAAAGTAGCTTTGGG	FALSE	1H2	✔	✔	✔	1nt	—
CCTAGATACTTTTAGCTTTGA	mga-nov-34	UYJE01006179.1_23801	12	34	28	6	AAATCTGAAAGTAGCTTTGGG	FALSE	1R2	✔	✔	✔	1nt	—
CCTAGATACTTTTAGCTTTGA	mga-nov-34	UYJE01006179.1_23887	15	39	20	19	TAAATCTGAAAGTAGCTTTGGG	FALSE	1N2	✔	✔	✔	1nt	—
CCTAGATACTTTTAGCTTTGA	mga-nov-34	UYJE01006179.1_28001	31	71	64	7	TAAATCTGAAAGTAGCTTTGGG	FALSE	1R1	✔	✔	✔	1nt	—
CCTAGATACTTTTAGCTTTGA	mga-nov-34	UYJE01006179.1_28091	13	36	18	18	TAAATCTGAAAGTAGCTTTGGG	FALSE	1H2	✔	✔	✔	1nt	—
TGCTGCACTTTTCTCAATCCAC	mga-nov-37	UYJE01006739.1_14131	12	25	8	17	GTTTGAGCATGGTGACAGTCAGC	FALSE	2R2	—	✔	✔	✔	—
TGCTGCACTTTTCTCAATCCAC	mga-nov-37	UYJE01006739.1_30161	21	43	32	11	GTTTGAGCATGGTGACAGTCAGCA	FALSE	1R1	—	✔	✔	✔	—
TGCTGCACTTTTCTCAATCCAC	mga-nov-37	UYJE01006846.1_14362	11	25	8	17	GTTTGAGCATGGTGACAGTCAGC	FALSE	2R2	—	✔	✔	✔	—
TGCTGCACTTTTCTCAATCCAC	mga-nov-37	UYJE01006846.1_26244	21	45	34	11	GGTTTGAGCATGGTGACAGTCAGC	FALSE	1N2	—	✔	✔	✔	—
TGCTGCACTTTTCTCAATCCAC	mga-nov-37	UYJE01006846.1_30644	20	43	32	11	GTTTGAGCATGGTGACAGTCAGCA	FALSE	1R1	—	✔	✔	✔	—
TGCTGCACTTTTCTCAATCCAC	mga-nov-37	UYJE01007566.1_15929	12	25	8	17	GTTTGAGCATGGTGACAGTCAGC	FALSE	2R2	—	✔	✔	✔	—
TGCTGCACTTTTCTCAATCCAC	mga-nov-37	UYJE01007566.1_28965	22	45	34	11	GGTTTGAGCATGGTGACAGTCAGC	FALSE	1N2	—	✔	✔	✔	—
TGCTGCACTTTTCTCAATCCAC	mga-nov-37	UYJE01007566.1_33751	21	43	32	11	GTTTGAGCATGGTGACAGTCAGCA	FALSE	1R1	—	✔	✔	✔	—
TGCTGCACTTTTCTCAATCCAC	mga-nov-37	UYJE01008717.1_18508	12	25	8	17	GTTTGAGCATGGTGACAGTCAGC	FALSE	2R2	—	✔	✔	✔	—
TGCTGCACTTTTCTCAATCCAC	mga-nov-37	UYJE01008717.1_33518	22	45	34	11	GGTTTGAGCATGGTGACAGTCAGC	FALSE	1N2	—	✔	✔	✔	—
TGCTGCACTTTTCTCAATCCAC	mga-nov-37	UYJE01008717.1_39240	21	43	32	11	GTTTGAGCATGGTGACAGTCAGCA	FALSE	1R1	—	✔	✔	✔	—
TGCTGCACTTTTCTCAATCCAC	mga-nov-37	UYJE01009756.1_20600	12	25	8	17	GTTTGAGCATGGTGACAGTCAGC	FALSE	2R2	—	✔	✔	✔	—
TGCTGCACTTTTCTCAATCCAC	mga-nov-37	UYJE01009756.1_37646	22	45	34	11	GGTTTGAGCATGGTGACAGTCAGC	FALSE	1N2	—	✔	✔	✔	—
TGCTGCACTTTTCTCAATCCAC	mga-nov-37	UYJE01009756.1_43836	21	43	32	11	GTTTGAGCATGGTGACAGTCAGCA	FALSE	1R1	—	✔	✔	✔	—
TGAGTATTTATTTTTTCTTAACC	mga-nov-38	UYJE01003536.1_16264	18	42	34	8	TCGGGAAAATATATAGTACTTG	FALSE	1H2	✔	✔	✔	❌	❌
TGAGTATTTATTTTTTCTTAACC	mga-nov-38	UYJE01003536.1_7038	29	63	54	9	TCGGGAAAATATATAGTACTTG	FALSE	1N1	✔	✔	✔	❌	❌
TGAGTATTTATTTTTTCTTAACC	mga-nov-38	UYJE01009052.1_17320	29	63	54	9	TCGGGAAAATATATAGTACTTG	FALSE	1N1	✔	✔	✔	❌	❌
TGAGTATTTATTTTTTCTTAACC	mga-nov-38	UYJE01009052.1_41102	18	42	34	8	TCGGGAAAATATATAGTACTTG	FALSE	1H2	✔	✔	✔	❌	❌
TTAACTTTGTGATTATTTTCGG	mga-nov-41	UYJE01001949.1_7439	16	31	13	18	AACTGTACTTGCAAGGTTTAAGG	TRUE	1N2	✔	✔	✔	1nt	—
TGACTATCCAGCGTAACGGAGA	mga-nov-42	UYJE01004889.1_10185	8	13	5	8	TCCTTTACGTTAGATAGTCA	FALSE	2R2	—	✔	✔	❌	❌
AATTGCAACTTGGTCAGAATTT	mga-nov-44	UYJE01007127.1_13559	32	61	46	15	ATTCTGACCAGTTGAACAGTT	FALSE	1N1	✔	✔	✔	—	❌
AATTGCAACTTGGTCAGAATTT	mga-nov-44	UYJE01007127.1_14405	8.3	14	8	6	ATTCTGACCAGTTGAACAGTT	FALSE	2N2	✔	✔	✔	—	❌
AATTGCAACTTGGTCAGAATTT	mga-nov-44	UYJE01010540.1_34552	16	30	12	18	ATTTCTGACCAGTTGAACAGTT	FALSE	1H1	✔	✔	✔	—	❌
AATTGCAACTTGGTCAGAATTT	mga-nov-44	UYJE01010540.1_40784	8.9	15	7	8	ATTTCTGACCAGTTGAACAGTT	FALSE	1N2	✔	✔	✔	—	❌
AATTGCAACTTGGTCAGAATTT	mga-nov-44	UYJE01010540.1_47362	42	80	61	19	TTTCTGACCAGTTGAACAGTT	FALSE	1R1	✔	✔	✔	—	❌
TAACACTGGCTATTGCTTGAA	mga-nov-46	UYJE01001917.1_8816	6.1	16	10	6	TTGAGAAATGACCATGTGTTGA	FALSE	1H2	❌	✔	✔	1nt	❌
TAACACTGGCTATTGCTTGAA	mga-nov-46	UYJE01006040.1_27499	6.1	16	10	6	TTGAGAAATGACCATGTGTTGA	FALSE	1H2	❌	✔	✔	1nt	❌
CATTTTATTAAGTACTTGGAC	mga-nov-49	UYJE01004296.1_8845	8.9	23	16	7	CCCAGTTACTTTATATTTGC	FALSE	2N2	❌	✔	✔	3nt	❌
CATTTTATTAAGTACTTGGAC	mga-nov-49	UYJE01009762.1_20150	8.5	23	16	7	CCCAGTTACTTTATATTTGC	FALSE	2N2	❌	✔	✔	3nt	❌
TCTGTTATCTCACTTGTAGTTCC	mga-nov-50	UYJE01009682.1_19969	12	22	16	6	AACTTTAGGTGAGATAATAGA	FALSE	2N2	❌	✔	✔	❌	❌
TCTGTTATCTCACTTGTAGTTCC	mga-nov-50	UYJE01009682.1_31645	10	17	11	6	AACTTTAGGTGAGATAATAGA	FALSE	1H1	❌	✔	✔	❌	❌
GATAGAAACATTGAAGTGCACT	mga-nov-51	UYJE01006786.1_13009	25	54	32	22	TCATTTCTGTGTTTCTCTCAC	FALSE	1N1	❌	✔	✔	✔	❌
GATAGAAACATTGAAGTGCACT	mga-nov-51	UYJE01006786.1_26061	15	36	28	8	GTCATTTCTGTGTTTCTCTCAC	FALSE	1N2	❌	✔	✔	✔	❌
GATAGAAACATTGAAGTGCACT	mga-nov-51	UYJE01006786.1_30443	33	71	49	22	GTCATTTCTGTGTTTCTCTCAC	FALSE	1R1	❌	✔	✔	✔	❌
TTTGATTTGAGCTCAGTTCAT	mga-nov-52	UYJE01005447.1_24812	360	730	724	6	TGGATTTAGCTCTTTGTCTAAG	FALSE	1H2	❌	✔	✔	1nt	—
ATACCACATACATCACATTTA	mga-nov-6	UYJE01008593.1_16403	4400	8673	8651	22	AATGTGATGATTGTGGAGGGATAT	FALSE	1N1	❌	✔	✔	❌	❌
ATACCACATACATCACATTTA	mga-nov-6	UYJE01008593.1_17677	2000	4028	4020	8	AATGTGATGATTGTGGAGGGATAT	FALSE	2N2	❌	✔	✔	❌	❌
ATACCACATACATCACATTTA	mga-nov-6	UYJE01008593.1_27987	3400	6678	6668	10	AATGTGATGATTGTGGAGGGATAT	FALSE	1H1	❌	✔	✔	❌	❌
ATACCACATACATCACATTTA	mga-nov-6	UYJE01008593.1_32737	1900	3849	3839	10	AATGTGATGATTGTGGAGGGATAT	FALSE	1R2	❌	✔	✔	❌	❌
ATACCACATACATCACATTTA	mga-nov-6	UYJE01008593.1_32989	1900	3811	3800	11	AATGTGATGATTGTGGAGGGATATTG	FALSE	1N2	❌	✔	✔	❌	❌
ATACCACATACATCACATTTA	mga-nov-6	UYJE01008593.1_38477	3700	7377	7365	12	AATGTGATGATTGTGGAGGGATAT	FALSE	1R1	❌	✔	✔	❌	❌
ATACCACATACATCACATTTA	mga-nov-6	UYJE01008593.1_38855	2600	5180	5173	7	AATGTGATGATTGTGGAGGGATAT	FALSE	1H2	❌	✔	✔	❌	❌
GAATGCCCCTTGAAATCCTGTA	mga-nov-7	UYJE01001349.1_2510	10000	21418	21288	130	CGGGATTTCAATTGGACATTACC	FALSE	1N1	✔	✔	✔	1nt	—
GAATGCCCCTTGAAATCCTGTA	mga-nov-7	UYJE01001349.1_2758	3900	7736	7703	33	CGGGATTTCAATTGGACATTACC	FALSE	2N2	✔	✔	✔	❌	—
GAATGCCCCTTGAAATCCTGTA	mga-nov-7	UYJE01001349.1_2782	1000	2109	2103	6	CGGGATTTCAATTGGACATTACC	FALSE	2R2	✔	✔	✔	❌	—
GAATGCCCCTTGAAATCCTGTA	mga-nov-7	UYJE01001349.1_3996	1500	3003	2993	10	CGGGATTTCAATTGGACATTACC	FALSE	2H2	✔	✔	✔	❌	—
GAATGCCCCTTGAAATCCTGTA	mga-nov-7	UYJE01001349.1_4426	4400	8668	8641	27	CGGGATTTCAATTGGACATTACC	FALSE	1H1	✔	✔	✔	1nt	—
GAATGCCCCTTGAAATCCTGTA	mga-nov-7	UYJE01001349.1_5058	4700	9318	9242	76	CGGGATTTCAATTGGACATTACC	FALSE	1N2	✔	✔	✔	❌	—
GAATGCCCCTTGAAATCCTGTA	mga-nov-7	UYJE01001349.1_5088	3500	6904	6841	63	CGGGATTTCAATTGGACATTACC	FALSE	1R2	✔	✔	✔	❌	—
GAATGCCCCTTGAAATCCTGTA	mga-nov-7	UYJE01001349.1_6036	5300	10583	10546	37	CGGGATTTCAATTGGACATTACC	FALSE	1H2	✔	✔	✔	❌	—
GAATGCCCCTTGAAATCCTGTA	mga-nov-7	UYJE01001349.1_6150	5400	10614	10540	74	CGGGATTTCAATTGGACATTACC	FALSE	1R1	✔	✔	✔	❌	—
AAATGCCCCCAAAAATCCTAAA		UYJE01006321.1_12152	2900	5819	5669	150	TTGGGATTTTTAGGTGGCATTATT	FALSE	1N1						Mgi-Mir-193-P2_3p
AAATGCCCCCAAAAATCCTAAA		UYJE01006321.1_12944	410	816	797	19	TTGGGATTTTTAGGTGGCATTATT	FALSE	2N2						Mgi-Mir-193-P2_3p
AAATGCCCCCAAAAATCCTAAA		UYJE01006321.1_13376	170	339	333	6	TTGGGATTTTTAGGTGGCATTATT	FALSE	2R2						Mgi-Mir-193-P2_3p
AAATGCCCCCAAAAATCCTAAA		UYJE01006321.1_20198	300	588	576	12	TTGGGATTTTTAGGTGGCATTAT	FALSE	2H2						Mgi-Mir-193-P2_3p
AAATGCCCCCAAAAATCCTAAA		UYJE01006321.1_20698	620	1229	1205	24	TTGGGATTTTTAGGTGGCATTATT	FALSE	1H1						Mgi-Mir-193-P2_3p
AAATGCCCCCAAAAATCCTAAA		UYJE01006321.1_24302	280	564	539	25	TTGGGATTTTTAGGTGGCATTATT	FALSE	1R2						Mgi-Mir-193-P2_3p
AAATGCCCCCAAAAATCCTAAA		UYJE01006321.1_24330	900	1779	1719	60	TTGGGATTTTTAGGTGGCATTATT	FALSE	1N2						Mgi-Mir-193-P2_3p
AAATGCCCCCAAAAATCCTAAA		UYJE01006321.1_28538	1200	2388	2334	54	TTGGGATTTTTAGGTGGCATTATT	FALSE	1R1						Mgi-Mir-193-P2_3p
AAATGCCCCCAAAAATCCTAAA		UYJE01006321.1_28596	770	1511	1428	83	TTGGGATTTTTAGGTGGCATTATT	FALSE	1H2						Mgi-Mir-193-P2_3p
AGTGGAGAGGGTTTTATCTCATC		UYJE01009482.1_19614	430	860	523	337	TGAGATTCAACTCCTCCAACTGC	FALSE	2N2						Snu-Mir-1175_5p*
AGTGGAGAGGGTTTTATCTCATC		UYJE01009482.1_20076	320	631	356	275	TGAGATTCAACTCCTCCAACTGC	FALSE	2R2						Snu-Mir-1175_5p*
AGTGGAGAGGGTTTTATCTCATC		UYJE01009482.1_30984	700	1379	776	603	TGAGATTCAACTCCTCCAACTGC	FALSE	1H1						Snu-Mir-1175_5p*
AGTGGAGAGGGTTTTATCTCATC		UYJE01009482.1_36166	1000	2145	1338	807	TGAGATTCAACTCCTCCAACTGC	FALSE	1R2						Snu-Mir-1175_5p*
AGTGGAGAGGGTTTTATCTCATC		UYJE01009482.1_36622	1400	2806	1636	1170	TGAGATTCAACTCCTCCAACTGC	FALSE	1N2						Snu-Mir-1175_5p*
AGTGGAGAGGGTTTTATCTCATC		UYJE01009482.1_42946	940	1854	1224	630	TGAGATTCAACTCCTCCAACTGC	FALSE	1H2						Snu-Mir-1175_5p*
ATTATACACCGGTGCCAAGTAA		UYJE01006198.1_11959	330	662	649	13	ATTTGGCACTTGTGGAATAATCA	FALSE	1N1						Ovu-Mir-96-P1i_3p
ATTATACACCGGTGCCAAGTAA		UYJE01006198.1_12713	180	364	340	24	ATTTGGCACTTGTGGAATAATCA	FALSE	2N2						Ovu-Mir-96-P1i_3p
ATTATACACCGGTGCCAAGTAA		UYJE01006198.1_13189	130	264	251	13	ATTTGGCACTTGTGGAATAATCA	FALSE	2R2						Ovu-Mir-96-P1i_3p
ATTATACACCGGTGCCAAGTAA		UYJE01006198.1_19839	130	266	252	14	ATTTGGCACTTGTGGAATAATCA	FALSE	2H2						Ovu-Mir-96-P1i_3p
ATTATACACCGGTGCCAAGTAA		UYJE01006198.1_20369	390	765	735	30	ATTTGGCACTTGTGGAATAATCA	FALSE	1H1						Ovu-Mir-96-P1i_3p
ATTATACACCGGTGCCAAGTAA		UYJE01006198.1_23829	160	327	299	28	ATTTGGCACTTGTGGAATAATCA	FALSE	1R2						Ovu-Mir-96-P1i_3p
ATTATACACCGGTGCCAAGTAA		UYJE01006198.1_23935	160	314	301	13	ATTTGGCACTTGTGGAATAATCA	FALSE	1N2						Ovu-Mir-96-P1i_3p
ATTATACACCGGTGCCAAGTAA		UYJE01006198.1_28065	230	452	436	16	ATTTGGCACTTGTGGAATAATCA	FALSE	1R1						Ovu-Mir-96-P1i_3p
ATTATACACCGGTGCCAAGTAA		UYJE01006198.1_28141	240	487	463	24	ATTTGGCACTTGTGGAATAATCA	FALSE	1H2						Ovu-Mir-96-P1i_3p
CCATACTTCTTTATTATCCCATA		UYJE01006951.1_13302	310	625	312	313	TGGAATGTAAAGAAGTATGTA	FALSE	1N1						Pve-Mir-1-P27_5p*
CCATACTTCTTTATTATCCCATA		UYJE01006951.1_14108	100	202	93	109	TGGAATGTAAAGAAGTATGTA	FALSE	2N2						Pve-Mir-1-P27_5p*
CCATACTTCTTTATTATCCCATA		UYJE01006951.1_14564	66	131	61	70	TGGAATGTAAAGAAGTATGTA	FALSE	2R2						Pve-Mir-1-P27_5p*
CCATACTTCTTTATTATCCCATA		UYJE01006951.1_21932	150	307	122	185	TGGAATGTAAAGAAGTATGTA	FALSE	2H2						Pve-Mir-1-P27_5p*
CCATACTTCTTTATTATCCCATA		UYJE01006951.1_26376	140	276	139	137	TGGAATGTAAAGAAGTATGTA	FALSE	1R2						Pve-Mir-1-P27_5p*
CCATACTTCTTTATTATCCCATA		UYJE01006951.1_26600	180	369	207	162	TGGAATGTAAAGAAGTATGTA	FALSE	1N2						Pve-Mir-1-P27_5p*
CCATACTTCTTTATTATCCCATA		UYJE01006951.1_31080	290	577	285	292	TGGAATGTAAAGAAGTATGTA	FALSE	1R1						Pve-Mir-1-P27_5p*
CCATACTTCTTTATTATCCCATA		UYJE01006951.1_31240	160	330	116	214	TGGAATGTAAAGAAGTATGTA	FALSE	1H2						Pve-Mir-1-P27_5p*
TATCACAGTCTGCTATGATGAGC		UYJE01007273.1_13857	7300	14497	14465	32	CCATTGTAGCGGCTGTTGATG	FALSE	1N1						War-Mir-2-o99_3p
TATCACAGTCTGCTATGATGAGC		UYJE01007273.1_14751	3600	7206	7185	21	CCATTGTAGCGGCTGTTGATG	FALSE	2N2						War-Mir-2-o99_3p
TATCACAGTCTGCTATGATGAGC		UYJE01007273.1_15147	3500	6987	6975	12	CCATTGTAGCGGCTGTTGATG	FALSE	2R2						War-Mir-2-o99_3p
TATCACAGTCTGCTATGATGAGC		UYJE01007273.1_22881	2400	4725	4719	6	CCATTGTAGCGGCTGTTGATG	FALSE	2H2						War-Mir-2-o99_3p
TATCACAGTCTGCTATGATGAGC		UYJE01007273.1_23569	6000	11895	11872	23	CCATTGTAGCGGCTGTTGATG	FALSE	1H1						War-Mir-2-o99_3p
TATCACAGTCTGCTATGATGAGC		UYJE01007273.1_27501	5100	10029	10002	27	CCATTGTAGCGGCTGTTGATG	FALSE	1R2						War-Mir-2-o99_3p
TATCACAGTCTGCTATGATGAGC		UYJE01007273.1_27659	5800	11379	11360	19	CCATTGTAGCGGCTGTTGATG	FALSE	1N2						War-Mir-2-o99_3p
TATCACAGTCTGCTATGATGAGC		UYJE01007273.1_32397	6800	13346	13322	24	CCATTGTAGCGGCTGTTGATG	FALSE	1R1						War-Mir-2-o99_3p
TATCACAGTCTGCTATGATGAGC		UYJE01007273.1_32623	5800	11399	11370	29	CCATTGTAGCGGCTGTTGATG	FALSE	1H2						War-Mir-2-o99_3p
TCACAACCTCCTTGAATGAGAT		UYJE01005908.1_11367	58000	114016	112984	1032	CCTTATTCAAACTGGTTGTGT	FALSE	1N1						Mgi-Mir-67-P5-3p
TCACAACCTCCTTGAATGAGAT		UYJE01005908.1_12041	14000	27828	27572	256	CCTTATTCAAACTGGTTGTGT	FALSE	2N2						Mgi-Mir-67-P5-3p
TCACAACCTCCTTGAATGAGAT		UYJE01005908.1_12499	15000	30165	29985	180	CCTTATTCAAACTGGTTGTGT	FALSE	2R2						Mgi-Mir-67-P5-3p
TCACAACCTCCTTGAATGAGAT		UYJE01005908.1_18829	24000	47196	47057	139	CCTTATTCAAACTGGTTGTGT	FALSE	2H2						Mgi-Mir-67-P5-3p
TCACAACCTCCTTGAATGAGAT		UYJE01005908.1_19353	22000	44539	44238	301	CCTTATTCAAACTGGTTGTGT	FALSE	1H1						Mgi-Mir-67-P5-3p
TCACAACCTCCTTGAATGAGAT		UYJE01005908.1_22613	25000	49625	49153	472	CCTTATTCAAACTGGTTGTGT	FALSE	1R2						Mgi-Mir-67-P5-3p
TCACAACCTCCTTGAATGAGAT		UYJE01005908.1_22705	50000	98867	98243	624	CCTTATTCAAACTGGTTGTGT	FALSE	1N2						Mgi-Mir-67-P5-3p
TCACAACCTCCTTGAATGAGAT		UYJE01005908.1_26631	61000	120653	120004	649	CCTTATTCAAACTGGTTGTGT	FALSE	1R1						Mgi-Mir-67-P5-3p
TCACAACCTCCTTGAATGAGAT		UYJE01005908.1_26817	30000	60315	60005	310	CCTTATTCAAACTGGTTGTGT	FALSE	1H2						Mgi-Mir-67-P5-3p
TGCACCAATATGATGCCAGAGGGA		UYJE01000932.1_4212	14	25	18	7	CCTGGTATCATGTTGTGTGAAGG	FALSE	1H2						Mgi-Novel-4_3p
TTAAGTACTAGTGCCGCGGGAA		UYJE01006490.1_12386	6400	12695	12675	20	CTCGTGGATCTAGTACCTAA	FALSE	1N1						Mgi-Mir-252-P2_5p
TTAAGTACTAGTGCCGCGGGAA		UYJE01006490.1_20614	930	1825	1817	8	CTCGTGGATCTAGTACCTAATA	FALSE	2H2						Mgi-Mir-252-P2_5p
TTAAGTACTAGTGCCGCGGGAA		UYJE01006490.1_21122	3000	6074	6067	7	CTCGTGGATCTAGTACCTAATA	FALSE	1H1						Mgi-Mir-252-P2_5p
TTAAGTACTAGTGCCGCGGGAA		UYJE01006490.1_24760	3100	6195	6189	6	TCGTGGATCTAGTACCTAA	FALSE	1R2						Mgi-Mir-252-P2_5p
TTAAGTACTAGTGCCGCGGGAA		UYJE01006490.1_29068	2200	4399	4386	13	CTCGTGGATCTAGTACCTAATA	FALSE	1R1						Mgi-Mir-252-P2_5p
TTAAGTACTAGTGCCGCGGGAA		UYJE01006490.1_29176	3200	6302	6295	7	CTCGTGGATCTAGTACCTAA	FALSE	1H2						Mgi-Mir-252-P2_5p
TTAAGTAGTGGTGCCGCGGGTA		UYJE01006490.1_12382	1800	3649	3643	6	CCAGCGTATCACTACTTTGTA	FALSE	1N1						Ovu-Mir-252-P1_5p
